# Supplementary material for: Systematic Review of Antimicrobial Combination Options for Pandrug-Resistant Acinetobacter baumannii
Source: MDPI journal article supplement (doi:10.3390/antibiotics10111344), 2021-11-03
Supplement: s1 [file s1]

## Supplementary Materials

### File S1: Table of Contents

|          |                                                                                                                      |           |
|----------|----------------------------------------------------------------------------------------------------------------------|-----------|
| <b>1</b> | <b>Abbreviations .....</b>                                                                                           | <b>3</b>  |
| <b>2</b> | <b>Summary of reviewed studies .....</b>                                                                             | <b>5</b>  |
| 2.1      | Summary and characteristics of reviewed studies .....                                                                | 5         |
| 2.2      | Distribution of studies by year of publication .....                                                                 | 12        |
| 2.3      | Distribution of studies by country and WHO regions .....                                                             | 13        |
| 2.4      | Number of eligible isolates per study .....                                                                          | 14        |
| 2.5      | Number of studies with single-centre vs multicentre design.....                                                      | 14        |
| <b>3</b> | <b>Overview of number of studies and eligible isolate for each combinations evaluated....</b>                        | <b>15</b> |
| 3.1      | Summary table; Number of studies and eligible isolates per combination and method used                               | 15        |
| 3.2      | Few studies available for each combination .....                                                                     | 28        |
| 3.3      | Number of studies per combination (only double combinations shown) .....                                             | 29        |
| 3.4      | Number of eligible isolates per combination (only double combinations shown).....                                    | 31        |
| 3.5      | Number of studies per combinations (only double combinations shown) tested by checkerboard method.....               | 33        |
| 3.6      | Number of eligible isolates per combination (only double combinations are shown) tested by checkerboard method ..... | 35        |
| 3.7      | Number of eligible studies (only double combinations shown) tested by TKA.....                                       | 37        |
| 3.8      | Number of eligible isolates (only double combinations shown) tested by TKA .....                                     | 39        |
| 3.9      | Number of eligible studies tested by gradient methods .....                                                          | 41        |
| 3.10     | Number of eligible isolates tested by gradient methods.....                                                          | 41        |
| 3.11     | Number of eligible studies tested by disk methods.....                                                               | 42        |
| 3.12     | Number of eligible isolates tested by disk methods .....                                                             | 42        |
| 3.13     | Number of eligible studies tested by agar dilution method .....                                                      | 43        |
| 3.14     | Number of eligible isolates tested by agar dilution method.....                                                      | 43        |
| 3.15     | Number of eligible studies (only double combinations shown) tested by dynamic in vitro PK/PD models .....            | 44        |

|          |                                                                                                                                                       |            |
|----------|-------------------------------------------------------------------------------------------------------------------------------------------------------|------------|
| 3.16     | Number of eligible isolates (only double combinations shown) tested by dynamic in vitro PK/PD models .....                                            | 44         |
| 3.17     | Number of eligible studies (only double combinations shown) tested by animal models .....                                                             | 46         |
| 3.18     | Number of eligible isolates (only double combinations shown) tested by animal models.....                                                             | 46         |
| <b>4</b> | <b>Assessment of clinical relevance of observed synergy .....</b>                                                                                     | <b>48</b>  |
| 4.1      | Summary Table (sum of all studies): Proportion of synergy and clinically relevant synergy in checkerboard (CHBD) and time-kill assay (TKA) .....      | 48         |
| 4.2      | Summary Table (sum of all studies): Proportion of synergy and clinically relevant synergy in gradient- and disk-based methods .....                   | 60         |
| 4.3      | Summary Table (sum of all studies): Proportion of synergy and clinically relevant synergy in agar dilution and dynamic in vitro PK/PD models.....     | 64         |
| 4.4      | Proportion of synergy and assessment of clinical relevance of observed synergy in checkerboard assays (study level data).....                         | 67         |
| 4.5      | Proportion of synergy and assessment of clinical relevance of observed synergy in time-kill assays (study level data) .....                           | 79         |
| 4.6      | Proportion of synergy and assessment of clinical relevance of observed synergy in studies using dynamic in vitro PK/PD models (study level data)..... | 88         |
| 4.7      | Proportion of synergy and assessment of clinical relevance of observed synergy in studies using animal models (study level data) .....                | 89         |
| 4.8      | Proportion of synergy and assessment of clinical relevance of observed synergy in other methods (study level data) .....                              | 92         |
| <b>5</b> | <b>Explanations for articles excluded as irrelevant.....</b>                                                                                          | <b>98</b>  |
| <b>6</b> | <b>List of non-English articles excluded .....</b>                                                                                                    | <b>99</b>  |
| <b>7</b> | <b>References.....</b>                                                                                                                                | <b>101</b> |

# 1 Abbreviations

**AMK**= amikacin,

**ATM**= aztreonam,

**AVI**= avibactam

**AZM**= azithromycin,

**CAZ**=ceftazidime,

**CFS**= cefoperazone/sulbactam,

**CHBD**= checkerboard assay

**CHL**= chloramphenicol,

**CIP**= ciprofloxacin,

**CRO**= ceftriaxone,

**CST**= colistin,

**CZA**= ceftazidime/avibactam,

**DAP**= daptomycin,

**DDST**= double-disk synergy test,

**DOR**= doripenem,

**ERV**= eravacycline,

**FA**= fusidic acid, **FEP**= cefepime,

**FICI**= fractional inhibitory concentration index,

**FOF**= fosfomycin,

**GEN**= gentamicin,

**HFIM**= hollow-fiber infection model,

**IMP**= imipenem,

**LVX**=levofloxacin,

**LZD**= linezolid,

**MCBT**= multiple-combination bactericidal test,

**MIN**= minocycline,  
**MEM**= meropenem,  
**MXF**= moxifloxacin,  
**NR**= not reported,  
**PK/PD**= pharmacokinetic/pharmacodynamic study,  
**PLZ**= plazomicin,  
**PMB**= polymyxin-B,  
**RFB**= rifabutin,  
**RIF**= rifampicin,  
**SAM**= ampicillin/sulbactam,  
**SUL**= sulbactam,  
**SXT**= trimethoprim/sulfamethoxazole,  
**TEC**= teicoplanin,  
**TIM**= ticarcillin-clavulanic acid,  
**TGC**= tigecycline,  
**TKA**= time-kill assay,  
**TMP**= trimethoprim,  
**TOB**= tobramycin,  
**TZB**= tazobactam,  
**TZP**= piperacillin/tazobactam,  
**VAN**= vancomycin

## 2 Summary of reviewed studies

### 2.1 Summary and characteristics of reviewed studies

| Author-Year                                            | Country (number of institutions from which the isolates were collected)                                   | Methods for evaluation of synergy                         | Antimicrobial combinations tested (synergy present/number of eligible <sup>1</sup> strains)                                                                                                                                                                                                                                                                                                              |
|--------------------------------------------------------|-----------------------------------------------------------------------------------------------------------|-----------------------------------------------------------|----------------------------------------------------------------------------------------------------------------------------------------------------------------------------------------------------------------------------------------------------------------------------------------------------------------------------------------------------------------------------------------------------------|
| Cebrero-Cangueiro T, 2021 [1] and Nordmann P, 2020 [2] | Barhein, Brazil, Colombia, France, Saudi Arabia, Switzerland, and Turkey (Unclear number of institutions) | CHBD, intraperitoneal infection mouse model               | MEM/IMP (CHBD 6/21, animal model 2/2)                                                                                                                                                                                                                                                                                                                                                                    |
| Cheng J 2021 [3]                                       | USA (NR)                                                                                                  | CHBD                                                      | CST/RIF (2/2), CST/RBT (3/3)                                                                                                                                                                                                                                                                                                                                                                             |
| Nwabor OF 2021 [4]                                     | Thailand (4)                                                                                              | CHBD, TKA                                                 | FOF/IMP (CHBD 0/2), FOF/MEM (CHBD 0/1), FOF/DOR (CHBD 3/3, TKA 0/1), FOF/GEN (CHBD 2/2), FOF/TOB (CHBD 1/2), FOF/CIP (CHBD 1/2, TKA 0/1), FOF/LVX (CHBD 0/1), FOF/TGC (CHBD 3/4, TKA 1/1)                                                                                                                                                                                                                |
| Armengol E, 2020 [5]                                   | Spain (1)                                                                                                 | CHBD                                                      | RIF/LZD (0/3)                                                                                                                                                                                                                                                                                                                                                                                            |
| Li J, 2020 [6]                                         | China (1)                                                                                                 | CHBD, TKA                                                 | CST/MEM (CHBD 4/5, TKA 1/1), CST/LVX (CHBD 1/1, TKA 1/1)                                                                                                                                                                                                                                                                                                                                                 |
| Limsrivanichakorn S, 2020 [7]                          | Thailand (1)                                                                                              | CHBD, E-test                                              | CFS/MXF (CHBD 4/80, E-test 2/80)                                                                                                                                                                                                                                                                                                                                                                         |
| Mohd Sazlly Lim S 2020 [8], 2021 [9], 2021 [10]        | Saudi Arabia, United Arab Emirates, Oman, Kuwait, Qatar, Bahrain (7)                                      | CHBD, TKA, semi-mechanistic PK/PD, Monte-Carlo simulation | <u>CHBD</u> : FOF/SUL (37/50), MEM/SUL (28/50), FOF/MEM (14/50), FOF/RIF (12/50), MEM/RIF (10/50), RIF/SUL (10/50).<br><u>TKA</u> : FOF/SUL (3/4)<br><u>semi-mechanistic PK/PD</u> : FOF/SUL (based on TKA for 2 isolates synergy was achievable at clinically relevant concentration).<br><u>PK/PD modelling and Monte-Carlo simulations</u> : FOF/MEM (proposed breakpoints: MEM 8 mg/L, FOF 128 mg/L) |
| Rodriguez CH, 2020 [11]                                | South America (6 countries, 15 hospitals)                                                                 | Agar dilution, TKA                                        | SUL/AVI (agar dilution 35/38, TKA 1/1)                                                                                                                                                                                                                                                                                                                                                                   |
| Gaudereto JJ, 2019                                     | Brazil (1)                                                                                                | DDST, TKA                                                 | CZA/MEM (DDST 2/11,                                                                                                                                                                                                                                                                                                                                                                                      |

| Author-Year                      | Country (number of institutions from which the isolates were collected) | Methods for evaluation of synergy          | Antimicrobial combinations tested (synergy present/number of eligible <sup>1</sup> strains)                                                       |
|----------------------------------|-------------------------------------------------------------------------|--------------------------------------------|---------------------------------------------------------------------------------------------------------------------------------------------------|
| [12]                             |                                                                         |                                            | TKA 0/11)                                                                                                                                         |
| Ghaith D, 2019 [13]              | Egypt (NR)                                                              | CHBD                                       | CST/RIF (14/23)                                                                                                                                   |
| Mataraci Kara E, 2019 [14]       | Turkey (1)                                                              | TKA                                        | CST/CZA (2/2), CZA/LVX (3/4), CZA/TGC (3/4), CZA/TOB (1/2), CZA/MEM (3/4)                                                                         |
| Mengucci TC 2019 [15], 2016 [16] | Brazil (2)                                                              | CHBD                                       | PMB/MEM (3/3), PMB/SUL (2/3), PMB/FOF (0/3), MEM/FOF (1/6), MEM/SUL (6), PMB/MEM/FOF (3), PMB/MEM/SUL (3/3)                                       |
| Oliva A, 2019 [17]               | Italy (1)                                                               | CHBD, TKA                                  | CST/VAN (CHBD 2/2, TKA 2/2), CST/RIF (CHBD 2/2, TKA 2/2), CST/MEM (CHBD 1/2, TKA 2/2s)                                                            |
| Ozger HS, 2019 [18]              | Turkey (NR)                                                             | CHBD                                       | CST/ERV (1/3)                                                                                                                                     |
| Phee LM, 2015 [19] and 2019 [20] | UK (1)                                                                  | CHBD, TKA, PK/PD modelling                 | CST/FA (CHBD 3/3, TKA 1/1)                                                                                                                        |
| Poulakou G, 2019 [21]            | Greece (1)                                                              | TKA, Intraperitoneal infection mouse model | CST/DAP (1/1)                                                                                                                                     |
| Shinohara DR, 2019 [22]          | Brazil (2)                                                              | CHBD, TKA, agar/disk, agar/gradient        | PMB/VAN (CHBD 3/3, TKA 2/3, agar/disk 2/3, agar/gradient 3/3)                                                                                     |
| Wang J, 2019 [23]                | China (4)                                                               | CHBD, TKA                                  | CHBD: MEM/VAN (3/5), MEM/SAM (2/5), MEM/TZB (2/5), MEM/CST (4/5)<br>TKA: MEM/CST (2/2)                                                            |
| Chen F, 2018 [24]                | China (1)                                                               | CHBD                                       | AMK/CIP (4/34), AMK/MEM (12/34), MEM/CIP (3/34)                                                                                                   |
| Singham-In U, 2018 [25]          | Thailand (1)                                                            | CHBD, TKA                                  | MEM/AMK (CHBD 2/2), MEM/FOF (CHBD 0/22), IMP/AMK (CHBD 1/2), IMP/FOF (CHBD 15/23, TKA 8/9)                                                        |
| Zhu W, 2018 [26]                 | China (1)                                                               | CHBD                                       | CST/IMP (2/3), CST/DOR (0/2), CST/FOF (0/3), CST/CFS (0/3), IMP/CFS (11/16), IMP/FOF (11/20)                                                      |
| Lenhard JR, 2017 [27,28]         | Thailand (1)                                                            | TKA, HFIM                                  | TKA:<br>PMB/MEM (0/2), PMB/SAM (0/2), MEM/SAM (0/2), PMB/MEM/SAM (2/2)<br>HFIM:<br>PMB/MEM (0/1), PMB/SAM (0/1), MEM/SAM (0/1), PMB/MEM/SAM (1/1) |
| Madadi-Goli N,                   | Iran (1)                                                                | Fixed ratio E-test                         | LVX/SAM (7/7), LVX/TGC (0/7), TGC/SAM                                                                                                             |

| Author-Year           | Country (number of institutions from which the isolates were collected) | Methods for evaluation of synergy                            | Antimicrobial combinations tested (synergy present/number of eligible <sup>1</sup> strains)                                                                                                                                                                                                                                                                                                                                                                                                                                                                                                                                                                                                                                                                                                                                                   |
|-----------------------|-------------------------------------------------------------------------|--------------------------------------------------------------|-----------------------------------------------------------------------------------------------------------------------------------------------------------------------------------------------------------------------------------------------------------------------------------------------------------------------------------------------------------------------------------------------------------------------------------------------------------------------------------------------------------------------------------------------------------------------------------------------------------------------------------------------------------------------------------------------------------------------------------------------------------------------------------------------------------------------------------------------|
| 2017 [29]             |                                                                         | method                                                       | (0/7)                                                                                                                                                                                                                                                                                                                                                                                                                                                                                                                                                                                                                                                                                                                                                                                                                                         |
| Wei W, 2017 [30]      | China (1)                                                               | CHBD, TKA, G. mellonella model                               | CST/LVX (CHBD 0/1, TKA 0/1, G. mellonella 0/1)                                                                                                                                                                                                                                                                                                                                                                                                                                                                                                                                                                                                                                                                                                                                                                                                |
| Wei WJ, 2017 [31]     | China (unclear)                                                         | CHBD, TKA                                                    | CST/CHL (CHBD 2/2, TKA 0/1)                                                                                                                                                                                                                                                                                                                                                                                                                                                                                                                                                                                                                                                                                                                                                                                                                   |
| Bae S, 2016 [32]      | South Korea (1)                                                         | MCBT, CHBD (only the CST-based combinations)                 | MCBT for all possible combinations of: CST, SAM, AMK, AZM, ATM, MEM, RIF, TGC, SXT, VAN, TEC. Synergy shown only for the following: SAM/RIF (1/8), SAM/SXT (1/7), SAM/TEC (1/8), AMK/CAZ (1/6), AMK/SXT (1/6), AZM/CAZ (1/9), AZM/SXT (1/7), AZM/TEC (1/8), ATM/CAZ (1/9), ATM/SXT (1/7), ATM/TEC (1/9), CAZ/MEM (1/9), CAZ/RIF (1/9), CAZ/TGC (1/9), CAZ/SXT (1/7), CAZ/VAN (1/9), MEM/RIF (1/9), MEM/SXT (1/7), MEM/TEC (1/9), RIF/SXT (1/7), SXT/VAN (1/7), AMK/RIF (2/6), CAZ/TEC (2/9), CST/RIF (9/9), CST/TEC (9/9), CST/VAN (8/9), CST/MEM (8/9), CST/ATM (8/9), CST/CAZ (6/9), CST/SAM (5/8), CST/SXT (3/7), CST/AMK (4/6), CST/AZM (4/8), CST/TGC (0/9)<br>CHBD: CST/RIF (9/9), CST/TEC (4/9), CST/VAN (7/9), CST/MEM (3/9), CST/ATM (4/9), CST/CAZ (4/9), CST/SAM (0/8), CST/SXT (1/7), CST/AMK (2/6), CST/AZM (1/8), CST/TGC (0/9) |
| Bowler SL, 2016 [33]  | USA (1)                                                                 | CHBD, TKA                                                    | CHBD: CST/FA (3/3), TKA: CST/FA (1/3), CST/VAN (1/3), CST/DOR (1/3)                                                                                                                                                                                                                                                                                                                                                                                                                                                                                                                                                                                                                                                                                                                                                                           |
| Hong DJ, 2016 [34]    | South Korea (1)                                                         | Fixed ratio E-test method                                    | CST/MEM (41), CST/IMP (41), CST/RIF (41)                                                                                                                                                                                                                                                                                                                                                                                                                                                                                                                                                                                                                                                                                                                                                                                                      |
| Laishram S, 2016 [35] | India (1)                                                               | CHBD, TKA                                                    | MEM/SUL (CHBD: 16/50, TKA: 29/50)                                                                                                                                                                                                                                                                                                                                                                                                                                                                                                                                                                                                                                                                                                                                                                                                             |
| Leite GC, 2016 [36]   | Brazil (unclear)                                                        | CHBD, (TKA data were excluded because reported data were not | CST/RIF (4/4), CST/VAN (7/7), CST/MEM (7/7), CST/IMP (7/7), CST/TGC (0/1), CST/FOF (0/6), CST/GEN (0/1), FOF/GEN (10/11), FOF/AMK (26/27)                                                                                                                                                                                                                                                                                                                                                                                                                                                                                                                                                                                                                                                                                                     |

| Author-Year                  | Country (number of institutions from which the isolates were collected) | Methods for evaluation of synergy        | Antimicrobial combinations tested (synergy present/number of eligible <sup>1</sup> strains)                                     |
|------------------------------|-------------------------------------------------------------------------|------------------------------------------|---------------------------------------------------------------------------------------------------------------------------------|
|                              |                                                                         | sufficient to allow accurate extraction) |                                                                                                                                 |
| Park GC, 2016 [37]           | South Korea (1***)                                                      | TKA                                      | CST/DOR (10/17), CST/TGC (7/12), TGC/DOR (5/45)                                                                                 |
| Yang H, 2016 [38]            | China (1)                                                               | CHBD, TKA, G. mellonella model           | CST/VAN (1/1)                                                                                                                   |
| Yang YS, 2016 [39]           | Taiwan (3)                                                              | CHBD, TKA                                | MEM/MIN (0/3), MEM/CFS (CHBD 0/2, TKA 1/2)                                                                                      |
| Yavaş S, 2016 [40]           | Turkey (1)                                                              | Fixed ratio E-test method                | MEM/SUL (1/7)                                                                                                                   |
| Córdoba J, 2015 [41]         | Spain (2)                                                               | Dynamic in-vitro PK/PD model             | IMP/ETP (0/3), CST/DAP (1/1), CST/IMP (0/1)                                                                                     |
| García-Salguero C, 2015 [42] | Spain (1)                                                               | Disk diffusion, CHBD, TKA                | AMK/IMP (CHBD 2/2), AMK/MEM (CHBD 2/2), AMK/FOF (CHBD 0/2), PLZ/IMP (CHBD 6/8), PLZ/MEM (CHBD 2/4), PLZ/FOF (CHBD 1/9, TKA 1/2) |
| Marie MA, 2015 [43]          | Saudi Arabia (1)                                                        | CHBD, E-test/agar method                 | MEM/SUL (CHBD 24/54, E-test 22/54), MEM/TZB (CHBD 22/54, E-test 19/54)                                                          |
| Rodriguez CH, 2015 [44]      | Argentina (1)                                                           | TKA                                      | IMP/MIN (0/1), MIN/RIF (0/1)                                                                                                    |
| Vourli S, 2015 [45]          | Greece (1)                                                              | CHBD                                     | CST/MEM (2/2), CST/SAM (0/2), MEM/SAM (0/5)                                                                                     |
| Galani I, 2014 [46]          | Greece (2)                                                              | E-test/agar dilution. TKA                | CST/DAP (0/4)                                                                                                                   |
| Majewski P, 2014 [47]        | Poland (1)                                                              | CHBD                                     | IMP/RIF (4/10)                                                                                                                  |
| Nastro M, 2014 [48]          | Argentina (unclear)                                                     | E-test/agar, TKA                         | CST/RIF (E-test/agar 4/4, TKA 4/4)                                                                                              |
| Oleksium LM, 2014 [49]       | USA (1)                                                                 | TKA                                      | CST/DOR (5/6), CST/SUL (2/6), CST/DOR/SUL (6/6), DOR/SUL (4/17)                                                                 |
| Percin D, 2014 [50]          | Turkey (3)                                                              | CHBD, TKA                                | CST/VAN (CHBD 9/10, TKA 10/10)                                                                                                  |
| Sun Y, 2014 [51]             | China (1)                                                               | CHBD                                     | MEM/CFS (0/11), MEM/AMK (0/9), MEM/CIP (1/11), MEM/AZM (0/12)                                                                   |
| Wang Y, 2014 [52]            | China (9)                                                               | CHBD, disk diffusion combination         | IMP/RIF (12/18)                                                                                                                 |
| Cetin ES, 2013 [53]          | Turkey (1)                                                              | CHBD, Perpendicular E-                   | RIF/SAM (7/7), RIF/CFS (2/7)                                                                                                    |

| Author-Year                    | Country (number of institutions from which the isolates were collected) | Methods for evaluation of synergy                    | Antimicrobial combinations tested (synergy present/number of eligible <sup>1</sup> strains)                                                                                                                                                      |
|--------------------------------|-------------------------------------------------------------------------|------------------------------------------------------|--------------------------------------------------------------------------------------------------------------------------------------------------------------------------------------------------------------------------------------------------|
|                                |                                                                         | test method                                          |                                                                                                                                                                                                                                                  |
| Housman ST, 2013 [54]          | USA (1)                                                                 | Dynamic in-vitro PK/PD model                         | <b>DOR/SAM</b> (0/3), <b>DOR/TGC</b> (0/2), <b>SAM/TGC</b> (0/1)                                                                                                                                                                                 |
| Lee HJ, 2013 [55]              | USA (1)                                                                 | Dynamic in-vitro PK/PD model                         | <b>CST/RIF</b> (1/1)                                                                                                                                                                                                                             |
| O'Hara JA, 2013 [56]           | USA (1)                                                                 | CHBD, TKA, <i>G. mellonella</i> infection model      | <b>CST/DOR</b> (CHBD 2/3, TKA 3/3, <i>G. mellonella</i> 0/3), <b>CST/VAN</b> (CHBD 3/3, TKA 2/3, <i>G. mellonella</i> 0/3), <b>VAN/DOR</b> (CHBD 0/3, TKA 0/3, <i>G. mellonella</i> 3/3), <b>CST/DOR/VAN</b> (TKA 3/3, <i>G. mellonella</i> 3/3) |
| Principe L, 2013 [57]          | Italy (7)                                                               | CHBD, (TKA also conducted, but no eligible isolates) | <b>DOR/TGC</b> (3/3), <b>DOR/AMK</b> (1/4), <b>DOR/CST</b> (0/1), <b>DOR/SAM</b> (0/1), <b>DOR/RIF</b> (0/1)                                                                                                                                     |
| Queenan AM, 2013 [58]          | USA (1)                                                                 | TKA, intraperitoneal infection mouse model           | <b>DOR/CIP</b> (TKA 0/1, mouse model 0/1), <b>DOR/ LVX</b> (TKA 0/1, mouse model 1/1)                                                                                                                                                            |
| Deveci A, 2012 [59]            | Turkey (1)                                                              | CHBD                                                 | <b>SUL/CAZ</b> (7/10), <b>SUL/MEM</b> (0/9), <b>SUL/CRO</b> (4/10), <b>SUL/CIP</b> (8/10), <b>SUL/GEN</b> (8/10), <b>SUL/FEP</b> (4/10)                                                                                                          |
| Peck KR, 2012 [60]             | South Korea (4)                                                         | TKA                                                  | <b>CST/RIF</b> (1/1), <b>CST/IMP</b> (0/2), <b>IMP/SAM</b> (6/6)                                                                                                                                                                                 |
| Vidaillac C, 2012 [61]         | France (1)                                                              | CHBD, TKA                                            | <b>CST/VAN</b> (CHBD 1/1, TKA 0.25xMIC 1/1, TKA 0.5xMIC 1/1), <b>CST/TMP</b> (CHBD 1/1, TKA 0.25xMIC 0/1, TKA 0.5xMIC 1/1), <b>CST/SXT</b> (CHBD 1/1, TKA 0.25xMIC 0/1, TKA 0.5xMIC 1/1)                                                         |
| Santimaleeworagun W, 2011 [62] | Thailand (1)                                                            | CHBD, TKA                                            | <b>SUL/FOF</b> (CHBD 5/6, TKA 5/6), <b>SUL/IMP</b> (CHBD 0/6)                                                                                                                                                                                    |
| Pachón-Ibáñez ME, 2011 [63]    | Spain (1)                                                               | TKA, pneumonia mouse models                          | <b>RIF/IMP</b> (TKA 2/2, animal model 0/2), <b>RIF/SUL</b> (TKA 2/2, animal model 1/2)                                                                                                                                                           |
| Tan TY, 2011 [64]              | Singapore (4)                                                           | CHBD, perpendicular E-test method, TKA               | <b>PMB/RIF</b> (CHBD 3/3, E-test 1/3, TKA 1/3), <b>PMB/TGC</b> (CHBD 3/4, E-test 0/4, TKA 0/4), <b>TGC/RIF</b> (CHBD 1/3, E-test 1/3, TKA 0/3)                                                                                                   |
| Kiratisin P, 2010 [65]         | Thailand (1)                                                            | Perpendicular E-test method                          | <b>DOR/CFS</b> (4/19), <b>DOR/DOX</b> (0/21), <b>DOR/RIF</b> (0/17), <b>DOR/NET</b> (0/21), <b>DOR/MXF</b> (0/21), <b>IMP/CFS</b> (9/19), <b>IMP/DOX</b> (0/21), <b>IMP/RIF</b> (0/17), <b>IMP/NET</b>                                           |

| Author-Year                             | Country (number of institutions from which the isolates were collected) | Methods for evaluation of synergy                           | Antimicrobial combinations tested (synergy present/number of eligible <sup>1</sup> strains)                                                            |
|-----------------------------------------|-------------------------------------------------------------------------|-------------------------------------------------------------|--------------------------------------------------------------------------------------------------------------------------------------------------------|
|                                         |                                                                         |                                                             | (0/21), IMP/MXF (1/21), MEM/CFS (10/19), MEM/DOX (0/21), MEM/RIF (0/17), MEM/NET (0/21), MEM/MXF (0/21)                                                |
| Pachón-Ibáñez ME, 2010 [66]             | Spain (1)                                                               | TKA, mouse pneumonia and meningitis model                   | SUL/IMP (TKA: 2/4, model 1/1), RIF/IMP (TKA 2/4, model 0/1), RIF/SUL (TKA 1/4, model 0/1)                                                              |
| Pankuch GA, 2010 [67]                   | Germany (1)                                                             | TKA                                                         | DOR/LVX (3/5), DOR/AMK (2/2), DOR/CST (4/4)                                                                                                            |
| Rodríguez CH, 2010 [68]                 | Argentina (1)                                                           | TKA                                                         | IMP/RIF (0/4), IMP/GEN (0/2)                                                                                                                           |
| Urban C, 2010 [69]                      | USA (1)                                                                 | TKA                                                         | DOR/RIF (2/5)                                                                                                                                          |
| Yuan Z, 2010 [70] and Lim TP, 2008 [71] | USA (1)                                                                 | TKA (interactive index method), HFIM, mouse pneumonia model | AMK/FEP (TKA 1/1, HFIM 0/1, mouse model 0/1), FEP/LVX (TKA 1/1, mouse model 1/1), AMK/LVX (TKA 0/1, HFIM 0/1, mouse model 0/1)                         |
| Lim TP, 2009 [72]                       | Singapore (1)                                                           | TKA                                                         | MEM/RIF (2/2), TGC/MEM (0/1), TGC/RIF (1/1)                                                                                                            |
| Principe L, 2009 [73]                   | Italy (5)                                                               | CHBD, TKA                                                   | TGC/LVX (CHBD 4/18, TKA 0/2), TGC/TZP (CHBD 0/18), TGC/AMK (CHBD 2/14, TKA 1/1), TGC/IMP (CHBD 1/12, TKA 0/1), TGC/RIF (CHBD 0/13), TGC/SAM (CHBD 0/6) |
| Song YC, 2009 [74]                      | South Korea (1)                                                         | Pneumonia mouse model                                       | IMP/RIF (3/3), RIF/AMK (0/1), IMP/AMK (0/1)                                                                                                            |
| Lee CH, 2008 [75]                       | Taiwan (1)                                                              | TKA                                                         | MEM/SUL (1/2)                                                                                                                                          |
| Lee NY, 2007 [76]                       | Taiwan (3)                                                              | Agar dilution, CHBD                                         | IMP/SUL (agar 4/4, CHBD 0/4), MEM/SUL (agar 4/4, CHBD 0/4)                                                                                             |
| Sader HS, 2005 [77]                     | USA (unclear)                                                           | CHBD                                                        | FEP/SUL (2/2)                                                                                                                                          |
| Sader HS, 2005 [78]                     | USA (unclear)                                                           | TKA                                                         | ATM/FEP (0/3), ATM/CAZ (0/3), ATM/MEM (0/1), ATM/SAM (0/1)                                                                                             |
| Choi JY, 2004 [79]                      | South Korea (1)                                                         | TKA                                                         | IMP/SUL (1/1)                                                                                                                                          |
| Jung R, 2004 [80]                       | USA (1)                                                                 | TKA                                                         | FEP/MXF (2/2)                                                                                                                                          |
| Montero A, 2004 [81]                    | Spain (1)                                                               | TKA, mouse pneumonia model                                  | IMP/RIF (TKA 2/2, mouse model 1/2), IMP/SUL (TKA 0/1)                                                                                                  |
| Yoon J, 2004 [82]                       | USA (1)                                                                 | TKA                                                         | PMB/IMP (1/1)                                                                                                                                          |
| Fernández-Cuenca F, 2003 [83]           | Spain (3)                                                               | CHBD                                                        | AZM/IMP (0/2), AZM/CAZ (1/3), AZM/AMK (0/2), AZM/CIP (0/3)                                                                                             |

| Author-Year                    | Country (number of institutions from which the isolates were collected) | Methods for evaluation of synergy | Antimicrobial combinations tested (synergy present/number of eligible <sup>1</sup> strains) |
|--------------------------------|-------------------------------------------------------------------------|-----------------------------------|---------------------------------------------------------------------------------------------|
| Roussel-Delvallez M, 1996 [84] | France (1)                                                              | TKA                               | IMP/SUL/AMK (0/8), IMP/TIM/AMK (0/8), TZP/SUL/AMK (0/8), TZP/TIM/AMK (0/8)                  |

Studies with overlapping isolates are grouped together (same row).

<sup>1</sup> Eligible= non-susceptible to the tested antimicrobial combinations. The number of eligible isolates can be different for each combination.

<sup>2</sup> See “Methods” for interpretation of clinical relevance

\*\* 50 isolates randomly selected from a pool of 117 isolates, 107 of which were from diverse clonal lineages [9]

\*\*\* 64 of 69 isolates from a single hospital. 5 of 69 from the Korean Antimicrobial Resistance Monitoring System

## 2.2 Distribution of studies by year of publication

| Year of publication | Number of studies (%) |
|---------------------|-----------------------|
| <b>2017-2021</b>    | <b>29 (35%)</b>       |
| 2021                | 5 (6%)                |
| 2020                | 6 (7%)                |
| 2019                | 10 (12%)              |
| 2018                | 3 (4%)                |
| 2017                | 5 (6%)                |
| <b>2012-2016</b>    | <b>32 (38%)</b>       |
| 2016                | 10 (12%)              |
| 2015                | 6 (7%)                |
| 2014                | 7 (8%)                |
| 2013                | 6 (7%)                |
| 2012                | 3 (4%)                |
| <b>2007-2011</b>    | <b>15 (18%)</b>       |
| 2011                | 3 (4%)                |
| 2010                | 6 (7%)                |
| 2009                | 3 (4%)                |
| 2008                | 2 (2%)                |
| 2007                | 1 (1%)                |
| <b>2002-2006</b>    | <b>7 (8%)</b>         |
| 2005                | 2 (2%)                |
| 2004                | 4 (5%)                |
| 2003                | 1 (1%)                |
| <b>1995-2001</b>    | <b>1 (1%)</b>         |
| 1996                | 1 (1%)                |

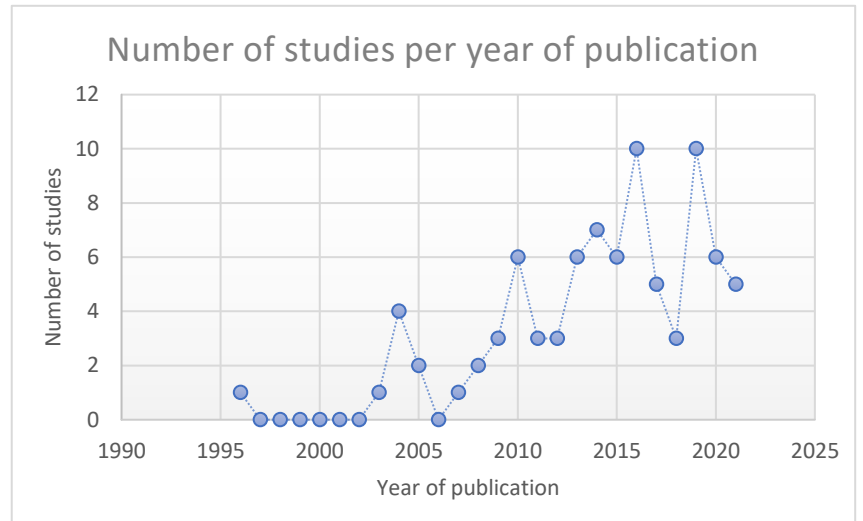

## 2.3 Distribution of studies by country and WHO regions

| WHO regions                         | Number of studies<br>per region (%) |
|-------------------------------------|-------------------------------------|
| <b>Americas</b>                     | <b>24 (29%)</b>                     |
| Brazil                              | 6 (7%)                              |
| USA                                 | 12 (14%)                            |
| Argentina                           | 3 (4%)                              |
| Colombia                            | 1 (1%)                              |
| <b>South-East Asia Region</b>       | <b>7 (8%)</b>                       |
| India                               | 1 (1%)                              |
| Thailand                            | 6 (7%)                              |
| <b>European Region</b>              | <b>28 (33%)</b>                     |
| France                              | 3 (4%)                              |
| Germany                             | 1 (1%)                              |
| Greece                              | 3 (4%)                              |
| Italy                               | 3 (4%)                              |
| Spain                               | 7 (8%)                              |
| Turkey                              | 7 (8%)                              |
| Switzerland                         | 1 (1%)                              |
| United Kingdom                      | 1 (1%)                              |
| <b>Eastern Mediterranean Region</b> | <b>5 (6%)</b>                       |
| Iran                                | 1 (1%)                              |
| Saudi Arabia                        | 4 (5%)                              |
| United Arab Emirates                | 2 (2%)                              |
| Oman                                | 2 (2%)                              |
| Kuwait                              | 2 (2%)                              |
| Qatar                               | 2 (2%)                              |
| Bahrain                             | 3 (4%)                              |
| <b>Western Pacific Region</b>       | <b>20 (24%)</b>                     |
| China                               | 9 (11%)                             |
| South Korea                         | 6 (7%)                              |
| Taiwan                              | 3 (3%)                              |

## 2.4 Number of eligible isolates per study

| Number of eligible isolates | Number of studies (%) |
|-----------------------------|-----------------------|
| 1-5                         | 51 (61%)              |
| 6-10                        | 13 (16%)              |
| 11-15                       | 2 (2%)                |
| 16-20                       | 3 (4%)                |
| 21-25                       | 4 (5%)                |
| 26-30                       | 1 (1%)                |
| 31-35                       | 1 (1%)                |
| 36-40                       | 1 (1%)                |
| 41-45                       | 1 (1%)                |
| 46-50                       | 4 (5%)                |
| 51-55                       | 2 (2%)                |
| > 55 (80)                   | 1 (1%)                |

## 2.5 Number of studies with single-centre vs multicentre design

|                      |          |
|----------------------|----------|
| Single-centre, n (%) | 54 (64%) |
| Multicentre, n (%)   | 26 (31%) |
| • 2 centres          | 6 (7%)   |
| • 3 centres          | 4 (5%)   |
| • 4 centres          | 4 (5%)   |
| • 5 centres          | 1 (1%)   |
| • 7 centres          | 5 (6%)   |
| • 9 centres          | 1 (1%)   |
| • 15 centres         | 1 (1%)   |
| • Unclear            | 4 (5%)   |
| Unclear, n (%)       | 4 (5%)   |

### 3 Overview of number of studies and eligible isolate for each combinations evaluated

#### 3.1 Summary table; Number of studies and eligible isolates per combination and method used

| Antimicrobial combinations | Total   |          | CHBD    |          | TKA     |          | Gradient-based methods |          | Disk-based methods |          | Agar dilution |          | Dynamic in vitro PK/PD modelling |          | Animal models |          |
|----------------------------|---------|----------|---------|----------|---------|----------|------------------------|----------|--------------------|----------|---------------|----------|----------------------------------|----------|---------------|----------|
|                            | Studies | Isolates | Studies | Isolates | Studies | Isolates | Studies                | Isolates | Studies            | Isolates | Studies       | Isolates | Studies                          | Isolates | Studies       | Isolates |
| <b>AZM-based</b>           |         |          |         |          |         |          |                        |          |                    |          |               |          |                                  |          |               |          |
| AZM/CAZ                    | 2       | 11       | 1       | 3        |         |          |                        |          |                    |          |               |          |                                  |          |               |          |
| AZM/CIP                    | 1       | 3        | 1       | 3        |         |          |                        |          |                    |          |               |          |                                  |          |               |          |
| AZM/IMP                    | 1       | 2        | 1       | 2        |         |          |                        |          |                    |          |               |          |                                  |          |               |          |
| AZM/MEM                    | 1       | 12       | 1       | 12       |         |          |                        |          |                    |          |               |          |                                  |          |               |          |
| AZM/AMK                    | 1       | 2        | 1       | 2        |         |          |                        |          |                    |          |               |          |                                  |          |               |          |
| AZM/CST                    | 1       | 8        | 1       | 8        |         |          |                        |          |                    |          |               |          |                                  |          |               |          |
| AZM/SXT                    | 1       | 6        |         |          |         |          |                        |          |                    |          |               |          |                                  |          |               |          |
| AZM/TEC                    | 1       | 8        |         |          |         |          |                        |          |                    |          |               |          |                                  |          |               |          |
| <b>ATM-based</b>           |         |          |         |          |         |          |                        |          |                    |          |               |          |                                  |          |               |          |
| ATM/SAM                    | 1       | 1        |         |          | 1       | 1        |                        |          |                    |          |               |          |                                  |          |               |          |
| ATM/CAZ                    | 2       | 13       |         |          | 1       | 3        |                        |          |                    |          |               |          |                                  |          |               |          |
| ATM/FEP                    | 1       | 3        |         |          | 1       | 3        |                        |          |                    |          |               |          |                                  |          |               |          |
| ATM/MEM                    | 1       | 3        |         |          | 1       | 1        |                        |          |                    |          |               |          |                                  |          |               |          |
| ATM/CST                    | 1       | 9        | 1       | 9        |         |          |                        |          |                    |          |               |          |                                  |          |               |          |
| ATM/SXT                    | 1       | 7        |         |          |         |          |                        |          |                    |          |               |          |                                  |          |               |          |
| ATM/TEC                    | 1       | 9        |         |          |         |          |                        |          |                    |          |               |          |                                  |          |               |          |
| <b>SUL-based</b>           |         |          |         |          |         |          |                        |          |                    |          |               |          |                                  |          |               |          |
| SUL/CRO                    | 1       | 10       | 1       | 10       |         |          |                        |          |                    |          |               |          |                                  |          |               |          |
| SUL/CAZ                    | 1       | 10       | 1       | 10       |         |          |                        |          |                    |          |               |          |                                  |          |               |          |
| SUL/FEP                    | 1       | 9        | 1       | 9        |         |          |                        |          |                    |          |               |          |                                  |          |               |          |
| SUL/CIP                    | 1       | 10       | 1       | 10       |         |          |                        |          |                    |          |               |          |                                  |          |               |          |
| SUL/IMP                    | 5       | 16       | 2       | 10       | 3       | 6        |                        |          |                    |          | 1             | 4        |                                  |          | 1             | 1        |

| Antimicrobial combinations | Total   |          | CHBD    |          | TKA     |          | Gradient-based methods |          | Disk-based methods |          | Agar dilution |          | Dynamic in vitro PK/PD modelling |          | Animal models |          |
|----------------------------|---------|----------|---------|----------|---------|----------|------------------------|----------|--------------------|----------|---------------|----------|----------------------------------|----------|---------------|----------|
|                            | Studies | Isolates | Studies | Isolates | Studies | Isolates | Studies                | Isolates | Studies            | Isolates | Studies       | Isolates | Studies                          | Isolates | Studies       | Isolates |
| SUL/MEM                    | 8       | 181      | 6       | 173      | 3       | 54       | 2                      | 61       |                    |          | 1             | 4        |                                  |          |               |          |
| SUL/DOR                    | 1       | 17       |         |          | 1       | 17       |                        |          |                    |          |               |          |                                  |          |               |          |
| SUL/AVI                    | 1       | 38       |         |          | 1       | 1        |                        |          |                    |          | 1             | 38       |                                  |          |               |          |
| SUL/GEN                    | 1       | 10       | 1       | 10       |         |          |                        |          |                    |          |               |          |                                  |          |               |          |
| SUL/CST                    | 1       | 6        |         |          | 1       | 6        |                        |          |                    |          |               |          |                                  |          |               |          |
| SUL/PMB                    | 1       | 3        | 1       | 3        |         |          |                        |          |                    |          |               |          |                                  |          |               |          |
| SUL/RIF                    | 3       | 56       | 1       | 50       | 2       | 6        |                        |          |                    |          |               |          |                                  |          | 2             | 3        |
| SUL/FOF                    | 2       | 56       | 2       | 56       | 2       | 10       |                        |          |                    |          |               |          |                                  |          |               |          |
| <b>SAM-based</b>           |         |          |         |          |         |          |                        |          |                    |          |               |          |                                  |          |               |          |
| SAM/ATM                    | 1       | 1        |         |          | 1       | 1        |                        |          |                    |          |               |          |                                  |          |               |          |
| SAM/FEP                    | 1       | 2        | 1       | 2        |         |          |                        |          |                    |          |               |          |                                  |          |               |          |
| SAM/LVX                    | 1       | 7        | 1       | 7        |         |          |                        |          |                    |          |               |          |                                  |          |               |          |
| SAM/IMP                    | 1       | 6        |         |          | 1       | 6        |                        |          |                    |          |               |          |                                  |          |               |          |
| SAM/MEM                    | 3       | 12       | 2       | 10       | 1       | 2        |                        |          |                    |          |               |          | 1                                | 1        |               |          |
| SAM/DOR                    | 2       | 7        | 1       | 1        |         |          |                        |          |                    |          |               |          | 1                                | 3        |               |          |
| SAM/CST                    | 2       | 10       | 2       | 10       |         |          |                        |          |                    |          |               |          |                                  |          |               |          |
| SAM/PMB                    | 1       | 2        |         |          | 1       | 2        |                        |          |                    |          |               |          | 1                                | 1        |               |          |
| SAM/TGC                    | 3       | 14       | 2       | 13       |         |          |                        |          |                    |          |               |          | 1                                | 1        |               |          |
| SAM/RIF                    | 2       | 15       | 1       | 7        |         |          | 1                      | 7        |                    |          |               |          |                                  |          |               |          |
| SAM/SXT                    | 1       | 7        |         |          |         |          |                        |          |                    |          |               |          |                                  |          |               |          |
| SAM/TEC                    | 1       | 8        |         |          |         |          |                        |          |                    |          |               |          |                                  |          |               |          |
| <b>CSF-based</b>           |         |          |         |          |         |          |                        |          |                    |          |               |          |                                  |          |               |          |
| CFS/MXF                    | 1       | 80       | 1       | 80       |         |          | 1                      | 80       |                    |          |               |          |                                  |          |               |          |
| CFS/IMP                    | 2       | 35       | 1       | 16       |         |          | 1                      | 19       |                    |          |               |          |                                  |          |               |          |
| CFS/MEM                    | 2       | 30       | 1       | 11       |         |          | 1                      | 19       |                    |          |               |          |                                  |          |               |          |
| CFS/DOR                    | 1       | 19       |         |          |         |          | 1                      | 19       |                    |          |               |          |                                  |          |               |          |

[illegible]

| Antimicrobial combinations | Total   |          | CHBD    |          | TKA     |          | Gradient-based methods |          | Disk-based methods |          | Agar dilution |          | Dynamic in vitro PK/PD modelling |          | Animal models |          |
|----------------------------|---------|----------|---------|----------|---------|----------|------------------------|----------|--------------------|----------|---------------|----------|----------------------------------|----------|---------------|----------|
|                            | Studies | Isolates | Studies | Isolates | Studies | Isolates | Studies                | Isolates | Studies            | Isolates | Studies       | Isolates | Studies                          | Isolates | Studies       | Isolates |
| FEP/MXF                    | 1       | 2        |         |          | 1       | 2        |                        |          |                    |          |               |          |                                  |          |               |          |
| FEP/AMK                    | 1       | 1        |         |          | 1       | 1        |                        |          |                    |          |               |          | 1                                | 1        | 1             | 1        |
| <b>CIP-based</b>           |         |          |         |          |         |          |                        |          |                    |          |               |          |                                  |          |               |          |
| CIP/AZM                    | 1       | 3        | 1       | 3        |         |          |                        |          |                    |          |               |          |                                  |          |               |          |
| CIP/SUL                    | 1       | 10       | 1       | 10       |         |          |                        |          |                    |          |               |          |                                  |          |               |          |
| CIP/MEM                    | 2       | 45       | 2       | 45       |         |          |                        |          |                    |          |               |          |                                  |          |               |          |
| CIP/DOR                    | 1       | 1        |         |          | 1       | 1        |                        |          |                    |          |               |          |                                  |          | 1             | 1        |
| CIP/AMK                    | 1       | 34       | 1       | 34       |         |          |                        |          |                    |          |               |          |                                  |          |               |          |
| CIP/FOF                    | 1       | 2        | 1       | 2        | 1       | 1        |                        |          |                    |          |               |          |                                  |          |               |          |
| <b>LVX-based</b>           |         |          |         |          |         |          |                        |          |                    |          |               |          |                                  |          |               |          |
| LVX/SAM                    | 1       | 7        | 1       | 7        |         |          |                        |          |                    |          |               |          |                                  |          |               |          |
| LVX/FEP                    | 1       | 1        |         |          | 1       | 1        |                        |          |                    |          |               |          |                                  |          | 1             | 1        |
| LVX/DOR                    | 2       | 6        |         |          | 2       | 6        |                        |          |                    |          |               |          |                                  |          | 1             | 1        |
| LVX/CZA                    | 1       | 4        |         |          | 1       | 4        |                        |          |                    |          |               |          |                                  |          |               |          |
| LVX/AMK                    | 1       | 1        |         |          | 1       | 1        |                        |          |                    |          |               |          | 1                                | 1        | 1             | 1        |
| LVX/CST                    | 2       | 2        | 2       | 2        | 2       | 2        |                        |          |                    |          |               |          |                                  |          | 1             | 1        |
| LVX/TGC                    | 2       | 25       | 2       | 25       | 1       | 2        |                        |          |                    |          |               |          |                                  |          |               |          |
| LVX-FOF                    | 1       | 1        | 1       | 1        |         |          |                        |          |                    |          |               |          |                                  |          |               |          |
| <b>MXF-based</b>           |         |          |         |          |         |          |                        |          |                    |          |               |          |                                  |          |               |          |
| MXF/CFS                    | 1       | 80       | 1       | 80       |         |          | 1                      | 80       |                    |          |               |          |                                  |          |               |          |
| MXF/FEP                    | 1       | 2        |         |          | 1       | 2        |                        |          |                    |          |               |          |                                  |          |               |          |
| MXF/IMP                    | 1       | 21       |         |          |         |          | 1                      | 21       |                    |          |               |          |                                  |          |               |          |
| MXF/MEM                    | 1       | 21       |         |          |         |          | 1                      | 21       |                    |          |               |          |                                  |          |               |          |
| MXF/DOR                    | 1       | 21       |         |          |         |          | 1                      | 21       |                    |          |               |          |                                  |          |               |          |
| <b>ETP-based</b>           |         |          |         |          |         |          |                        |          |                    |          |               |          |                                  |          |               |          |
| ETP/IMP                    | 1       | 3        |         |          |         |          |                        |          |                    |          |               |          | 1                                | 3        |               |          |

| Antimicrobial combinations | Total   |          | CHBD    |          | TKA     |          | Gradient-based methods |          | Disk-based methods |          | Agar dilution |          | Dynamic in vitro PK/PD modelling |          | Animal models |          |
|----------------------------|---------|----------|---------|----------|---------|----------|------------------------|----------|--------------------|----------|---------------|----------|----------------------------------|----------|---------------|----------|
|                            | Studies | Isolates | Studies | Isolates | Studies | Isolates | Studies                | Isolates | Studies            | Isolates | Studies       | Isolates | Studies                          | Isolates | Studies       | Isolates |
| <b>IMP-based</b>           |         |          |         |          |         |          |                        |          |                    |          |               |          |                                  |          |               |          |
| IMP/AZM                    | 1       | 2        | 1       | 2        |         |          |                        |          |                    |          |               |          |                                  |          |               |          |
| IMP/SUL                    | 5       | 16       | 2       | 10       | 3       | 6        |                        |          |                    |          | 1             | 4        |                                  |          | 1             | 1        |
| IMP/SAM                    | 1       | 6        |         |          | 1       | 6        |                        |          |                    |          |               |          |                                  |          |               |          |
| IMP/CFS                    | 2       | 35       | 1       | 16       |         |          | 1                      | 19       |                    |          |               |          |                                  |          |               |          |
| IMP/MXF                    | 1       | 21       |         |          |         |          | 1                      | 21       |                    |          |               |          |                                  |          |               |          |
| IMP/ETP                    | 1       | 3        |         |          |         |          |                        |          |                    |          |               |          | 1                                | 3        |               |          |
| IMP/MEM                    | 1       | 21       | 1       | 21       |         |          |                        |          |                    |          |               |          |                                  |          | 1             | 2        |
| IMP/AMK                    | 3       | 6        | 2       | 4        |         |          |                        |          |                    |          |               |          |                                  |          | 1             | 1        |
| IMP/GEN                    | 1       | 2        |         |          | 1       | 2        |                        |          |                    |          |               |          |                                  |          |               |          |
| IMP/NET                    | 1       | 21       |         |          |         |          | 1                      | 21       |                    |          |               |          |                                  |          |               |          |
| IMP/PLZ                    | 1       | 8        | 1       | 8        |         |          |                        |          |                    |          |               |          |                                  |          |               |          |
| IMP/CST                    | 5       | 54       | 2       | 10       | 1       | 2        | 1                      | 41       |                    |          |               |          | 1                                | 1        |               |          |
| IMP/PMB                    | 1       | 1        |         |          | 1       | 1        |                        |          |                    |          |               |          |                                  |          |               |          |
| IMP/DOX                    | 1       | 21       |         |          |         |          | 1                      | 21       |                    |          |               |          |                                  |          |               |          |
| IMP/TGC                    | 1       | 12       | 1       | 12       | 1       | 1        |                        |          |                    |          |               |          |                                  |          |               |          |
| IMP/MIN                    | 1       | 1        |         |          | 1       | 1        |                        |          |                    |          |               |          |                                  |          |               |          |
| IMP/RIF                    | 9       | 61       | 2       | 28       | 5       | 13       | 1                      | 17       | 1                  | 1        |               |          |                                  |          | 4             | 8        |
| IMP/FOF                    | 3       | 45       | 3       | 45       | 1       | 9        |                        |          |                    |          |               |          |                                  |          |               |          |
| <b>MEM-based</b>           |         |          |         |          |         |          |                        |          |                    |          |               |          |                                  |          |               |          |
| MEM/AZM                    | 1       | 12       | 1       | 12       |         |          |                        |          |                    |          |               |          |                                  |          |               |          |
| MEM/ATM                    | 1       | 3        |         |          | 1       | 1        |                        |          |                    |          |               |          |                                  |          |               |          |
| MEM/SUL                    | 8       | 181      | 6       | 173      | 3       | 54       | 2                      | 61       |                    |          | 1             | 4        |                                  |          |               |          |
| MEM/SAM                    | 3       | 12       | 2       | 10       | 1       | 2        |                        |          |                    |          |               |          | 1                                | 1        |               |          |
| MEM/CFS                    | 2       | 30       | 1       | 11       |         |          | 1                      | 19       |                    |          |               |          |                                  |          |               |          |
| MEM/TZB                    | 2       | 59       | 2       | 59       |         |          | 1                      | 54       |                    |          |               |          |                                  |          |               |          |

[illegible]

[illegible]



| Antimicrobial combinations | Total   |          | CHBD    |          | TKA     |          | Gradient-based methods |          | Disk-based methods |          | Agar dilution |          | Dynamic in vitro PK/PD modelling |          | Animal models |          |
|----------------------------|---------|----------|---------|----------|---------|----------|------------------------|----------|--------------------|----------|---------------|----------|----------------------------------|----------|---------------|----------|
|                            | Studies | Isolates | Studies | Isolates | Studies | Isolates | Studies                | Isolates | Studies            | Isolates | Studies       | Isolates | Studies                          | Isolates | Studies       | Isolates |
| CST/LVX                    | 2       | 2        | 2       | 2        | 2       | 2        |                        |          |                    |          |               |          |                                  |          | 1             | 1        |
| CST/IMP                    | 5       | 54       | 2       | 10       | 1       | 2        | 1                      | 41       |                    |          |               |          | 1                                | 1        |               |          |
| CST/MEM                    | 7       | 70       | 6       | 29       | 3       | 4        | 1                      | 41       |                    |          |               |          |                                  |          |               |          |
| CST/DOR                    | 7       | 37       | 3       | 6        | 5       | 33       |                        |          |                    |          |               |          |                                  |          | 1             | 3        |
| CST/CZA                    | 1       | 2        |         |          | 1       | 2        |                        |          |                    |          |               |          |                                  |          |               |          |
| CST/AMK                    | 1       | 6        | 1       | 6        |         |          |                        |          |                    |          |               |          |                                  |          |               |          |
| CST/GEN                    | 1       | 1        | 1       | 1        |         |          |                        |          |                    |          |               |          |                                  |          |               |          |
| CST/TGC                    | 3       | 22       | 2       | 10       | 1       | 12       |                        |          |                    |          |               |          |                                  |          |               |          |
| CST/ERV                    | 1       | 3        | 1       | 3        |         |          |                        |          |                    |          |               |          |                                  |          |               |          |
| CST/RIF                    | 9       | 87       | 5       | 40       | 3       | 7        | 2                      | 45       |                    |          |               |          | 1                                | 1        |               |          |
| CST/RFB                    | 1       | 3        | 1       | 3        |         |          |                        |          |                    |          |               |          |                                  |          |               |          |
| CST/FOF                    | 2       | 9        | 2       | 9        |         |          |                        |          |                    |          |               |          |                                  |          |               |          |
| CST/TMP                    | 1       | 1        | 1       | 1        | 1       | 1        |                        |          |                    |          |               |          |                                  |          |               |          |
| CST/SXT                    | 2       | 9        | 2       | 8        | 1       | 1        |                        |          |                    |          |               |          |                                  |          |               |          |
| CST/CHL                    | 1       | 2        | 1       | 2        | 1       | 2        |                        |          |                    |          |               |          |                                  |          |               |          |
| CST/FA                     | 2       | 6        | 2       | 6        | 2       | 4        |                        |          | 1                  | 3        |               |          |                                  |          |               |          |
| CST/VAN                    | 8       | 36       | 7       | 33       | 6       | 20       |                        |          |                    |          |               |          |                                  |          | 2             | 4        |
| CST/TEC                    | 1       | 9        | 1       | 9        |         |          |                        |          |                    |          |               |          |                                  |          |               |          |
| CST/DAP                    | 3       | 6        |         |          | 2       | 5        | 1                      | 4        |                    |          |               |          | 1                                | 1        | 1             | 1        |
| <b>PMB-based</b>           |         |          |         |          |         |          |                        |          |                    |          |               |          |                                  |          |               |          |
| PMB/SUL                    | 1       | 3        | 1       | 3        |         |          |                        |          |                    |          |               |          |                                  |          |               |          |
| PMB/SAM                    | 1       | 2        | 0       | 0        | 1       | 2        |                        |          |                    |          |               |          | 1                                | 1        |               |          |
| PMB/IMP                    | 1       | 1        | 0       | 0        | 1       | 1        |                        |          |                    |          |               |          |                                  |          |               |          |
| PMB/MEM                    | 2       | 5        | 1       | 3        | 1       | 2        |                        |          |                    |          |               |          | 1                                | 1        |               |          |
| PMB/TGC                    | 1       | 4        | 1       | 4        | 1       | 4        | 1                      | 4        |                    |          |               |          |                                  |          |               |          |
| PMB/RIF                    | 1       | 3        | 1       | 3        | 1       | 3        | 1                      | 3        |                    |          |               |          |                                  |          |               |          |





[illegible]

| Antimicrobial combinations | Total   |          | CHBD    |          | TKA     |          | Gradient-based methods |          | Disk-based methods |          | Agar dilution |          | Dynamic in vitro PK/PD modelling |          | Animal models |          |
|----------------------------|---------|----------|---------|----------|---------|----------|------------------------|----------|--------------------|----------|---------------|----------|----------------------------------|----------|---------------|----------|
|                            | Studies | Isolates | Studies | Isolates | Studies | Isolates | Studies                | Isolates | Studies            | Isolates | Studies       | Isolates | Studies                          | Isolates | Studies       | Isolates |
| VAN/CST                    | 8       | 36       | 7       | 33       | 6       | 20       |                        |          |                    |          |               |          |                                  |          | 2             | 4        |
| VAN/PMB                    | 1       | 3        | 1       | 3        | 1       | 3        | 1                      | 3        | 1                  | 3        |               |          |                                  |          |               |          |
| VAN/SXT                    | 1       | 7        |         |          |         |          |                        |          |                    |          |               |          |                                  |          |               |          |
| <b>TEC-based</b>           |         |          |         |          |         |          |                        |          |                    |          |               |          |                                  |          |               |          |
| TEC/AZM                    | 1       | 8        |         |          |         |          |                        |          |                    |          |               |          |                                  |          |               |          |
| TEC/ATM                    | 1       | 9        |         |          |         |          |                        |          |                    |          |               |          |                                  |          |               |          |
| TEC/SAM                    | 1       | 8        |         |          |         |          |                        |          |                    |          |               |          |                                  |          |               |          |
| TEC/CAZ                    | 1       | 9        |         |          |         |          |                        |          |                    |          |               |          |                                  |          |               |          |
| TEC/MEM                    | 1       | 9        |         |          |         |          |                        |          |                    |          |               |          |                                  |          |               |          |
| TEC/CST                    | 1       | 9        | 1       | 9        |         |          |                        |          |                    |          |               |          |                                  |          |               |          |
| <b>DAP-based</b>           |         |          |         |          |         |          |                        |          |                    |          |               |          |                                  |          |               |          |
| DAP/CST                    | 3       | 6        |         |          | 2       | 5        | 1                      | 4        |                    |          |               |          | 1                                | 1        | 1             | 1        |
| <b>LZD-based</b>           |         |          |         |          |         |          |                        |          |                    |          |               |          |                                  |          |               |          |
| LZD/RIF                    | 1       | 3        | 1       | 3        |         |          |                        |          |                    |          |               |          |                                  |          |               |          |
| <b>Triple combinations</b> |         |          |         |          |         |          |                        |          |                    |          |               |          |                                  |          |               |          |
| PMB/FOF/MEM                | 1       | 3        | 1       | 3        |         |          |                        |          |                    |          |               |          |                                  |          |               |          |
| PMB/SUL/MEM                | 1       | 3        | 1       | 3        |         |          |                        |          |                    |          |               |          |                                  |          |               |          |
| PMB/SAM/MEM                | 2       | 2        |         |          | 2       | 2        |                        |          |                    |          |               |          | 1                                | 1        |               |          |
| CST/DOR/SUL                | 1       | 6        |         |          | 1       | 6        |                        |          |                    |          |               |          |                                  |          |               |          |
| CST/VAN/DOR                | 1       | 3        |         |          | 1       | 3        |                        |          |                    |          |               |          |                                  |          | 1             | 3        |
| IMP/SUL/AMK                | 1       | 8        |         |          | 1       | 8        |                        |          |                    |          |               |          |                                  |          |               |          |
| IMP/TIM/AMK                | 1       | 8        |         |          | 1       | 8        |                        |          |                    |          |               |          |                                  |          |               |          |
| TZP/SUL/AMK                | 1       | 8        |         |          | 1       | 8        |                        |          |                    |          |               |          |                                  |          |               |          |
| TZP/TIM/AMK                | 1       | 8        |         |          | 1       | 8        |                        |          |                    |          |               |          |                                  |          |               |          |

MCBT assay was used in only 1 study and is not shown in the Table. See Section 4.5 (Bae S, 2016 [32])

### 3.2 Few studies available for each combination

| Number of studies | Number of combinations |
|-------------------|------------------------|
| 1                 | 98                     |
| 2                 | 22                     |
| 3                 | 11                     |
| 4                 | 2                      |
| 5                 | 2                      |
| 6                 | 0                      |
| 7                 | 2                      |
| 8                 | 2                      |
| 9                 | 2                      |

I.e. there were; only 1 study available for 98 of the 141 double combinations evaluated, 2 studies for 22 of the combinations, 3 studies for 11 of the combinations, 4 studies for 2 of the combinations, 5 studies for 2 of the combinations, 7 studies for 2 of the combinations, 8 studies for 2 of the combinations and 9 studies for 2 of the combinations.

### 3.3 Number of studies per combination (only double combinations shown)

|     | AZM | ATM | SUL | SAM | CFS | TZB | TZP | CRO | CAZ | FEP | CIP | LVX | MXF | ETP | IMP | MEM | DOR | CZA | AVI | AMK | GEN | TOB | NET | PLZ | CST | PMB | DOX | TGC | MIN | ERV | RIF | RFB | FOF | TMP | SXT | CHL | FA | VAN |   |   |
|-----|-----|-----|-----|-----|-----|-----|-----|-----|-----|-----|-----|-----|-----|-----|-----|-----|-----|-----|-----|-----|-----|-----|-----|-----|-----|-----|-----|-----|-----|-----|-----|-----|-----|-----|-----|-----|----|-----|---|---|
| AZM |     | 0   | 0   | 0   | 0   | 0   | 0   | 0   | 2   | 0   | 1   | 0   | 0   | 0   | 1   | 1   | 0   | 0   | 0   | 1   | 0   | 0   | 0   | 0   | 1   | 0   | 0   | 0   | 0   | 0   | 0   | 0   | 0   | 0   | 1   | 0   | 0  | 0   |   |   |
| ATM | 0   |     | 0   | 1   | 0   | 0   | 0   | 0   | 2   | 1   | 0   | 0   | 0   | 0   | 0   | 1   | 0   | 0   | 0   | 0   | 0   | 0   | 0   | 0   | 1   | 0   | 0   | 0   | 0   | 0   | 0   | 0   | 0   | 0   | 1   | 0   | 0  | 0   |   |   |
| SUL | 0   | 0   |     |     |     | 0   | 0   | 1   | 1   | 1   | 1   | 0   | 0   | 0   | 5   | 8   | 1   | 0   | 1   | 0   | 1   | 0   | 0   | 0   | 1   | 1   | 0   | 0   | 0   | 0   | 0   | 3   | 0   | 2   | 0   | 0   | 0  | 0   |   |   |
| SAM | 0   | 1   |     |     |     | 0   | 0   | 0   | 0   | 0   | 1   | 0   | 1   | 0   | 1   | 0   | 0   | 1   | 3   | 2   | 0   | 0   | 0   | 0   | 0   | 0   | 2   | 1   | 0   | 3   | 0   | 0   | 2   | 0   | 0   | 0   | 1  | 0   | 0 | 0 |
| CFS | 0   | 0   |     |     |     | 0   | 0   | 0   | 0   | 0   | 0   | 0   | 0   | 0   | 1   | 0   | 2   | 2   | 1   | 0   | 0   | 0   | 0   | 0   | 0   | 0   | 1   | 0   | 0   | 0   | 1   | 0   | 1   | 0   | 0   | 0   | 0  | 0   | 0 | 0 |
| TZB | 0   | 0   | 0   | 0   | 0   |     | 0   | 0   | 0   | 0   | 0   | 0   | 0   | 0   | 0   | 2   | 0   | 0   | 0   | 0   | 0   | 0   | 0   | 0   | 0   | 0   | 0   | 0   | 0   | 0   | 0   | 0   | 0   | 0   | 0   | 0   | 0  | 0   | 0 |   |
| TZP | 0   | 0   | 0   | 0   | 0   | 0   |     | 0   | 0   | 0   | 0   | 0   | 0   | 0   | 0   | 0   | 0   | 0   | 0   | 0   | 0   | 0   | 0   | 0   | 0   | 0   | 0   | 1   | 0   | 0   | 0   | 0   | 0   | 0   | 0   | 0   | 0  | 0   | 0 |   |
| CRO | 0   | 0   | 1   | 0   | 0   | 0   | 0   |     | 0   | 0   | 0   | 0   | 0   | 0   | 0   | 0   | 0   | 0   | 0   | 0   | 0   | 0   | 0   | 0   | 0   | 0   | 0   | 0   | 0   | 0   | 0   | 0   | 0   | 0   | 0   | 0   | 0  | 0   | 0 |   |
| CAZ | 2   | 2   | 1   | 0   | 0   | 0   | 0   | 0   |     | 0   | 0   | 0   | 0   | 0   | 0   | 1   | 0   | 0   | 0   | 1   | 0   | 0   | 0   | 0   | 1   | 0   | 0   | 1   | 0   | 0   | 1   | 0   | 0   | 0   | 1   | 0   | 0  | 1   |   |   |
| FEP | 0   | 1   | 1   | 1   | 0   | 0   | 0   | 0   | 0   |     | 0   | 1   | 1   | 0   | 0   | 0   | 0   | 0   | 0   | 1   | 0   | 0   | 0   | 0   | 0   | 0   | 0   | 0   | 0   | 0   | 0   | 0   | 0   | 0   | 0   | 0   | 0  | 0   | 0 |   |
| CIP | 1   | 0   | 1   | 0   | 0   | 0   | 0   | 0   | 0   | 0   |     | 0   | 0   | 0   | 0   | 2   | 1   | 0   | 0   | 1   | 0   | 0   | 0   | 0   | 0   | 0   | 0   | 0   | 0   | 0   | 0   | 0   | 0   | 1   | 0   | 0   | 0  | 0   | 0 |   |
| LVX | 0   | 0   | 0   | 1   | 0   | 0   | 0   | 0   | 0   | 1   | 0   |     | 0   | 0   | 0   | 0   | 2   | 1   | 0   | 1   | 0   | 0   | 0   | 0   | 2   | 0   | 0   | 2   | 0   | 0   | 0   | 0   | 1   | 0   | 0   | 0   | 0  | 0   | 0 |   |
| MXF | 0   | 0   | 0   | 0   | 1   | 0   | 0   | 0   | 0   | 1   | 0   | 0   |     | 0   | 1   | 1   | 1   | 0   | 0   | 0   | 0   | 0   | 0   | 0   | 0   | 0   | 0   | 0   | 0   | 0   | 0   | 0   | 0   | 0   | 0   | 0   | 0  | 0   | 0 |   |
| ETP | 0   | 0   | 0   | 0   | 0   | 0   | 0   | 0   | 0   | 0   | 0   | 0   | 0   |     | 1   | 0   | 0   | 0   | 0   | 0   | 0   | 0   | 0   | 0   | 0   | 0   | 0   | 0   | 0   | 0   | 0   | 0   | 0   | 0   | 0   | 0   | 0  | 0   | 0 |   |
| IMP | 1   | 0   | 5   | 1   | 2   | 0   | 0   | 0   | 0   | 0   | 0   | 0   | 1   | 1   |     | 1   | 0   | 0   | 0   | 3   | 1   | 0   | 1   | 1   | 5   | 1   | 1   | 1   | 1   | 0   | 9   | 0   | 3   | 0   | 0   | 0   | 0  | 0   | 0 |   |
| MEM | 1   | 1   | 8   | 3   | 2   | 2   | 0   | 0   | 1   | 0   | 2   | 0   | 1   | 1   | 1   |     | 0   | 2   | 0   | 3   | 0   | 0   | 1   | 1   | 7   | 2   | 1   | 1   | 1   | 0   | 4   | 0   | 4   | 0   | 1   | 0   | 0  | 1   | 0 | 0 |
| DOR | 0   | 0   | 1   | 2   | 1   | 0   | 0   | 0   | 0   | 0   | 1   | 2   | 1   | 0   | 0   | 0   |     | 0   | 0   | 2   | 0   | 0   | 1   | 0   | 7   | 0   | 1   | 3   | 0   | 0   | 3   | 0   | 1   | 0   | 0   | 0   | 0  | 0   | 1 |   |
| CZA | 0   | 0   | 0   | 0   | 0   | 0   | 0   | 0   | 0   | 0   | 0   | 1   | 0   | 0   | 0   | 2   | 0   |     | 0   | 0   | 0   | 1   | 0   | 0   | 1   | 0   | 0   | 1   | 0   | 0   | 0   | 0   | 0   | 0   | 0   | 0   | 0  | 0   | 0 |   |
| AVI | 0   | 0   | 1   | 0   | 0   | 0   | 0   | 0   | 0   | 0   | 0   | 0   | 0   | 0   | 0   | 0   | 0   | 0   |     | 0   | 0   | 0   | 0   | 0   | 0   | 0   | 0   | 0   | 0   | 0   | 0   | 0   | 0   | 0   | 0   | 0   | 0  | 0   | 0 |   |
| AMK | 1   | 0   | 0   | 0   | 0   | 0   | 0   | 0   | 1   | 1   | 1   | 1   | 0   | 0   | 3   | 3   | 2   | 0   | 0   |     | 0   | 0   | 0   | 0   | 1   | 0   | 0   | 1   | 0   | 0   | 2   | 0   | 2   | 0   | 1   | 0   | 0  | 0   | 0 |   |
| GEN | 0   | 0   | 1   | 0   | 0   | 0   | 0   | 0   | 0   | 0   | 0   | 0   | 0   | 0   | 1   | 0   | 0   | 0   | 0   | 0   |     | 0   | 0   | 0   | 1   | 0   | 0   | 0   | 0   | 0   | 0   | 0   | 2   | 0   | 0   | 0   | 0  | 0   | 0 |   |
| TOB | 0   | 0   | 0   | 0   | 0   | 0   | 0   | 0   | 0   | 0   | 0   | 0   | 0   | 0   | 0   | 0   | 0   | 1   | 0   | 0   | 0   |     | 0   | 0   | 0   | 0   | 0   | 0   | 0   | 0   | 0   | 0   | 1   | 0   | 0   | 0   | 0  | 0   | 0 |   |
| NET | 0   | 0   | 0   | 0   | 0   | 0   | 0   | 0   | 0   | 0   | 0   | 0   | 0   | 0   | 1   | 1   | 1   | 0   | 0   | 0   | 0   | 0   |     | 0   | 0   | 0   | 0   | 0   | 0   | 0   | 0   | 0   | 0   | 0   | 0   | 0   | 0  | 0   | 0 | 0 |
| PLZ | 0   | 0   | 0   | 0   | 0   | 0   | 0   | 0   | 0   | 0   | 0   | 0   | 0   | 0   | 1   | 1   | 0   | 0   | 0   | 0   | 0   | 0   |     | 0   | 0   | 0   | 0   | 0   | 0   | 0   | 0   | 0   | 0   | 1   | 0   | 0   | 0  | 0   | 0 | 0 |
| CST | 1   | 1   | 1   | 2   | 1   | 0   | 0   | 0   | 1   | 0   | 0   | 2   | 0   | 0   | 5   | 7   | 7   | 1   | 0   | 1   | 1   | 0   | 0   |     |     |     | 0   | 3   | 0   | 1   | 9   | 1   | 2   | 1   | 2   | 1   | 2  |     | 8 |   |
| PMB | 0   | 0   | 1   | 1   | 0   | 0   | 0   | 0   | 0   | 0   | 0   | 0   | 0   | 0   | 1   | 2   | 0   | 0   | 0   | 0   | 0   | 0   | 0   |     |     |     | 0   | 1   | 0   | 0   | 1   | 0   | 1   | 0   | 0   | 0   | 0  | 0   | 1 |   |
| DOX | 0   | 0   | 0   | 0   | 0   | 0   | 0   | 0   | 0   | 0   | 0   | 0   | 0   | 0   | 1   | 1   | 1   | 0   | 0   | 0   | 0   | 0   | 0   | 0   |     | 0   |     |     | 0   | 0   | 0   | 0   | 0   | 0   | 0   | 0   | 0  | 0   | 0 | 0 |
| TGC | 0   | 0   | 0   | 3   | 0   | 0   | 1   | 0   | 1   | 0   | 0   | 2   | 0   | 0   | 1   | 1   | 3   | 1   | 0   | 1   | 0   | 0   | 0   | 0   | 3   | 1   | 0   |     |     |     | 3   | 0   | 1   | 0   | 0   | 0   | 0  | 0   | 0 | 0 |
| MIN | 0   | 0   | 0   | 0   | 1   | 0   | 0   | 0   | 0   | 0   | 0   | 0   | 0   | 0   | 1   | 1   | 0   | 0   | 0   | 0   | 0   | 0   | 0   | 0   | 0   | 0   |     |     |     |     | 0   | 0   | 0   | 0   | 0   | 0   | 0  | 0   | 0 |   |
| ERV | 0   | 0   | 0   | 0   | 0   | 0   | 0   | 0   | 0   | 0   | 0   | 0   | 0   | 0   | 0   | 0   | 0   | 0   | 0   | 0   | 0   | 0   | 0   | 1   | 0   | 0   |     |     |     |     | 0   | 0   | 0   | 0   | 0   | 0   | 0  | 0   | 0 | 0 |
| RIF | 0   | 0   | 3   | 2   | 1   | 0   | 0   | 0   | 1   | 0   | 0   | 0   | 0   | 0   | 9   | 4   | 3   | 0   | 0   | 2   | 0   | 0   | 0   | 0   | 9   | 1   | 0   | 3   | 0   | 0   |     |     |     | 1   | 0   | 1   | 0  | 0   | 0 | 0 |

|     | AZM | ATM | SUL | SAM | CFS | TZB | TZP | CRO | CAZ | FEP | CIP | LVX | MXF | ETP | IMP | MEM | DOR | CZA | AVI | AMK | GEN | TOB | NET | PLZ | CST | PMB | DOX | TGC | MIN | ERV | RIF | RFB | FOF | TMP | SXT | CHL | FA | VAN |   |   |
|-----|-----|-----|-----|-----|-----|-----|-----|-----|-----|-----|-----|-----|-----|-----|-----|-----|-----|-----|-----|-----|-----|-----|-----|-----|-----|-----|-----|-----|-----|-----|-----|-----|-----|-----|-----|-----|----|-----|---|---|
| RFB | 0   | 0   | 0   | 0   | 0   | 0   | 0   | 0   | 0   | 0   | 0   | 0   | 0   | 0   | 0   | 0   | 0   | 0   | 0   | 0   | 0   | 0   | 0   | 0   | 1   | 0   | 0   | 0   | 0   | 0   |     |     | 0   | 0   | 0   | 0   | 0  | 0   |   |   |
| FOF | 0   | 0   | 2   | 0   | 0   | 0   | 0   | 0   | 0   | 0   | 1   | 1   | 0   | 0   | 3   | 4   | 1   | 0   | 0   | 2   | 2   | 1   | 0   | 1   | 2   | 1   | 0   | 1   | 0   | 0   | 1   | 0   |     | 0   | 0   | 0   | 0  | 0   | 0 |   |
| TMP | 0   | 0   | 0   | 0   | 0   | 0   | 0   | 0   | 0   | 0   | 0   | 0   | 0   | 0   | 0   | 0   | 0   | 0   | 0   | 0   | 0   | 0   | 0   | 0   | 1   | 0   | 0   | 0   | 0   | 0   | 0   | 0   |     |     |     |     | 0  | 0   | 0 |   |
| SXT | 1   | 1   | 0   | 1   | 0   | 0   | 0   | 0   | 1   | 0   | 0   | 0   | 0   | 0   | 0   | 1   | 0   | 0   | 0   | 1   | 0   | 0   | 0   | 0   | 2   | 0   | 0   | 0   | 0   | 0   | 1   | 0   | 0   |     |     |     |    | 0   | 0 | 1 |
| CHL | 0   | 0   | 0   | 0   | 0   | 0   | 0   | 0   | 0   | 0   | 0   | 0   | 0   | 0   | 0   | 0   | 0   | 0   | 0   | 0   | 0   | 0   | 0   | 0   | 1   | 0   | 0   | 0   | 0   | 0   | 0   | 0   | 0   | 0   | 0   |     | 0  | 0   | 0 |   |
| FA  | 0   | 0   | 0   | 0   | 0   | 0   | 0   | 0   | 0   | 0   | 0   | 0   | 0   | 0   | 0   | 0   | 0   | 0   | 0   | 0   | 0   | 0   | 0   | 0   | 2   | 0   | 0   | 0   | 0   | 0   | 0   | 0   | 0   | 0   | 0   | 0   | 0  |     | 0 | 0 |
| VAN | 0   | 0   | 0   | 0   | 0   | 0   | 0   | 0   | 1   | 0   | 0   | 0   | 0   | 0   | 0   | 1   | 1   | 0   | 0   | 0   | 0   | 0   | 0   | 0   | 8   | 1   | 0   | 0   | 0   | 0   | 0   | 0   | 0   | 0   | 0   | 1   | 0  | 0   |   |   |
| TEC | 1   | 1   | 0   | 1   | 0   | 0   | 0   | 0   | 1   | 0   | 0   | 0   | 0   | 0   | 0   | 1   | 0   | 0   | 0   | 0   | 0   | 0   | 0   | 0   | 1   | 0   | 0   | 0   | 0   | 0   | 0   | 0   | 0   | 0   | 0   | 0   | 0  | 0   | 0 | 0 |
| DAP | 0   | 0   | 0   | 0   | 0   | 0   | 0   | 0   | 0   | 0   | 0   | 0   | 0   | 0   | 0   | 0   | 0   | 0   | 0   | 0   | 0   | 0   | 0   | 0   | 3   | 0   | 0   | 0   | 0   | 0   | 0   | 0   | 0   | 0   | 0   | 0   | 0  | 0   | 0 | 0 |
| LZD | 0   | 0   | 0   | 0   | 0   | 0   | 0   | 0   | 0   | 0   | 0   | 0   | 0   | 0   | 0   | 0   | 0   | 0   | 0   | 0   | 0   | 0   | 0   | 0   | 0   | 0   | 0   | 0   | 0   | 0   | 1   | 0   | 0   | 0   | 0   | 0   | 0  | 0   | 0 |   |

|  |           |  |           |
|--|-----------|--|-----------|
|  | 1 study   |  | 6 studies |
|  | 2 studies |  | 7 studies |
|  | 3 studies |  | 8 studies |
|  | 4 studies |  | 9 studies |

### 3.4 Number of eligible isolates per combination (only double combinations shown)

|     | AZM | ATM | SUL | SAM | CFS | TZB | TZP | CRO | CAZ | FEP | CIP | LVX | MXF | ETP | IMP | MEM | DOR | CZA | AVI | AMK | GEN | TOB | NET | PLZ | CST | PMB | DOX | TGC | MIN | ERV | RIF | RFB | FOF | TMP | SXT | CHL | FA | VAN |   |
|-----|-----|-----|-----|-----|-----|-----|-----|-----|-----|-----|-----|-----|-----|-----|-----|-----|-----|-----|-----|-----|-----|-----|-----|-----|-----|-----|-----|-----|-----|-----|-----|-----|-----|-----|-----|-----|----|-----|---|
| AZM |     | 0   | 0   | 0   | 0   | 0   | 0   | 0   | 11  | 0   | 3   | 0   | 0   | 0   | 2   | 12  | 0   | 0   | 0   | 2   | 0   | 0   | 0   | 0   | 8   | 0   | 0   | 0   | 0   | 0   | 0   | 0   | 0   | 0   | 6   | 0   | 0  | 0   |   |
| ATM | 0   |     | 0   | 1   | 0   | 0   | 0   | 0   | 13  | 3   | 0   | 0   | 0   | 0   | 0   | 3   | 0   | 0   | 0   | 0   | 0   | 0   | 0   | 0   | 9   | 0   | 0   | 0   | 0   | 0   | 0   | 0   | 0   | 0   | 7   | 0   | 0  | 0   |   |
| SUL | 0   | 0   |     |     |     | 0   | 0   | 10  | 10  | 9   | 10  | 0   | 0   | 0   | 16  | 181 | 17  | 0   | 38  | 0   | 10  | 0   | 0   | 0   | 6   | 3   | 0   | 0   | 0   | 0   | 56  | 0   | 56  | 0   | 0   | 0   | 0  | 0   |   |
| SAM | 0   | 1   |     |     |     | 0   | 0   | 0   | 0   | 2   | 0   | 7   | 0   | 0   | 6   | 12  | 7   | 0   | 0   | 0   | 0   | 0   | 0   | 10  | 2   | 0   | 14  | 0   | 0   | 15  | 0   | 0   | 0   | 0   | 7   | 0   | 0  | 0   |   |
| CFS | 0   | 0   |     |     |     | 0   | 0   | 0   | 0   | 0   | 0   | 0   | 80  | 0   | 35  | 30  | 19  | 0   | 0   | 0   | 0   | 0   | 0   | 3   | 0   | 0   | 0   | 2   | 0   | 7   | 0   | 0   | 0   | 0   | 0   | 0   | 0  | 0   |   |
| TZB | 0   | 0   | 0   | 0   | 0   |     | 0   | 0   | 0   | 0   | 0   | 0   | 0   | 0   | 0   | 59  | 0   | 0   | 0   | 0   | 0   | 0   | 0   | 0   | 0   | 0   | 0   | 0   | 0   | 0   | 0   | 0   | 0   | 0   | 0   | 0   | 0  | 0   |   |
| TZP | 0   | 0   | 0   | 0   | 0   | 0   |     | 0   | 0   | 0   | 0   | 0   | 0   | 0   | 0   | 0   | 0   | 0   | 0   | 0   | 0   | 0   | 0   | 0   | 0   | 0   | 0   | 18  | 0   | 0   | 0   | 0   | 0   | 0   | 0   | 0   | 0  | 0   |   |
| CRO | 0   | 0   | 10  | 0   | 0   | 0   | 0   |     | 0   | 0   | 0   | 0   | 0   | 0   | 0   | 0   | 0   | 0   | 0   | 0   | 0   | 0   | 0   | 0   | 0   | 0   | 0   | 0   | 0   | 0   | 0   | 0   | 0   | 0   | 0   | 0   | 0  | 0   |   |
| CAZ | 11  | 13  | 10  | 0   | 0   | 0   | 0   | 0   |     | 0   | 0   | 0   | 0   | 0   | 0   | 9   | 0   | 0   | 0   | 6   | 0   | 0   | 0   | 0   | 9   | 0   | 0   | 9   | 0   | 0   | 9   | 0   | 0   | 0   | 7   | 0   | 0  | 9   |   |
| FEP | 0   | 3   | 9   | 2   | 0   | 0   | 0   | 0   | 0   |     | 0   | 1   | 2   | 0   | 0   | 0   | 0   | 0   | 0   | 1   | 0   | 0   | 0   | 0   | 0   | 0   | 0   | 0   | 0   | 0   | 0   | 0   | 0   | 0   | 0   | 0   | 0  | 0   |   |
| CIP | 3   | 0   | 10  | 0   | 0   | 0   | 0   | 0   | 0   | 0   |     | 0   | 0   | 0   | 0   | 45  | 1   | 0   | 0   | 34  | 0   | 0   | 0   | 0   | 0   | 0   | 0   | 0   | 0   | 0   | 0   | 0   | 2   | 0   | 0   | 0   | 0  | 0   |   |
| LVX | 0   | 0   | 0   | 7   | 0   | 0   | 0   | 0   | 0   | 1   | 0   |     | 0   | 0   | 0   | 0   | 6   | 4   | 0   | 1   | 0   | 0   | 0   | 0   | 2   | 0   | 0   | 25  | 0   | 0   | 0   | 0   | 0   | 1   | 0   | 0   | 0  | 0   |   |
| MXF | 0   | 0   | 0   | 0   | 80  | 0   | 0   | 0   | 0   | 2   | 0   | 0   |     | 0   | 21  | 21  | 21  | 0   | 0   | 0   | 0   | 0   | 0   | 0   | 0   | 0   | 0   | 0   | 0   | 0   | 0   | 0   | 0   | 0   | 0   | 0   | 0  | 0   |   |
| ETP | 0   | 0   | 0   | 0   | 0   | 0   | 0   | 0   | 0   | 0   | 0   | 0   | 0   |     | 3   | 0   | 0   | 0   | 0   | 0   | 0   | 0   | 0   | 0   | 0   | 0   | 0   | 0   | 0   | 0   | 0   | 0   | 0   | 0   | 0   | 0   | 0  | 0   |   |
| IMP | 2   | 0   | 16  | 6   | 35  | 0   | 0   | 0   | 0   | 0   | 0   | 0   | 21  | 3   |     | 21  | 0   | 0   | 0   | 6   | 2   | 0   | 21  | 8   | 54  | 1   | 21  | 12  | 1   | 0   | 61  | 0   | 45  | 0   | 0   | 0   | 0  | 0   |   |
| MEM | 12  | 3   | 181 | 12  | 30  | 59  | 0   | 0   | 9   | 0   | 45  | 0   | 21  | 0   | 21  |     | 0   | 15  | 0   | 45  | 0   | 0   | 21  | 4   | 70  | 5   | 21  | 1   | 3   | 0   | 78  | 0   | 79  | 0   | 7   | 0   | 0  | 5   |   |
| DOR | 0   | 0   | 17  | 7   | 19  | 0   | 0   | 0   | 0   | 0   | 1   | 6   | 21  | 0   | 0   | 0   |     | 0   | 0   | 6   | 0   | 0   | 21  | 0   | 37  | 0   | 21  | 50  | 0   | 0   | 23  | 0   | 3   | 0   | 0   | 0   | 0  | 3   |   |
| CZA | 0   | 0   | 0   | 0   | 0   | 0   | 0   | 0   | 0   | 0   | 0   | 4   | 0   | 0   | 0   | 15  | 0   |     | 0   | 0   | 0   | 2   | 0   | 0   | 2   | 0   | 0   | 4   | 0   | 0   | 0   | 0   | 0   | 0   | 0   | 0   | 0  | 0   |   |
| AVI | 0   | 0   | 38  | 0   | 0   | 0   | 0   | 0   | 0   | 0   | 0   | 0   | 0   | 0   | 0   | 0   | 0   | 0   |     | 0   | 0   | 0   | 0   | 0   | 0   | 0   | 0   | 0   | 0   | 0   | 0   | 0   | 0   | 0   | 0   | 0   | 0  | 0   |   |
| AMK | 2   | 0   | 0   | 0   | 0   | 0   | 0   | 0   | 6   | 1   | 34  | 1   | 0   | 0   | 6   | 45  | 6   | 0   | 0   |     | 0   | 0   | 0   | 0   | 6   | 0   | 0   | 14  | 0   | 0   | 8   | 0   | 29  | 0   | 6   | 0   | 0  | 0   |   |
| GEN | 0   | 0   | 10  | 0   | 0   | 0   | 0   | 0   | 0   | 0   | 0   | 0   | 0   | 0   | 2   | 0   | 0   | 0   | 0   | 0   |     | 0   | 0   | 0   | 1   | 0   | 0   | 0   | 0   | 0   | 0   | 0   | 13  | 0   | 0   | 0   | 0  | 0   |   |
| TOB | 0   | 0   | 0   | 0   | 0   | 0   | 0   | 0   | 0   | 0   | 0   | 0   | 0   | 0   | 0   | 0   | 0   | 2   | 0   | 0   | 0   |     | 0   | 0   | 0   | 0   | 0   | 0   | 0   | 0   | 0   | 0   | 2   | 0   | 0   | 0   | 0  | 0   |   |
| NET | 0   | 0   | 0   | 0   | 0   | 0   | 0   | 0   | 0   | 0   | 0   | 0   | 0   | 0   | 21  | 21  | 21  | 0   | 0   | 0   | 0   | 0   |     | 0   | 0   | 0   | 0   | 0   | 0   | 0   | 0   | 0   | 0   | 0   | 0   | 0   | 0  | 0   | 0 |
| PLZ | 0   | 0   | 0   | 0   | 0   | 0   | 0   | 0   | 0   | 0   | 0   | 0   | 0   | 0   | 8   | 4   | 0   | 0   | 0   | 0   | 0   | 0   | 0   |     | 0   | 0   | 0   | 0   | 0   | 0   | 0   | 0   | 9   | 0   | 0   | 0   | 0  | 0   |   |
| CST | 8   | 9   | 6   | 10  | 3   | 0   | 0   | 0   | 9   | 0   | 0   | 2   | 0   | 0   | 54  | 70  | 37  | 2   | 0   | 6   | 1   | 0   | 0   | 0   |     |     | 0   | 22  | 0   | 3   | 87  | 3   | 9   | 1   | 9   | 2   | 6  | 36  |   |
| PMB | 0   | 0   | 3   | 2   | 0   | 0   | 0   | 0   | 0   | 0   | 0   | 0   | 0   | 0   | 1   | 5   | 0   | 0   | 0   | 0   | 0   | 0   | 0   | 0   |     |     | 0   | 4   | 0   | 0   | 3   | 0   | 3   | 0   | 0   | 0   | 0  | 0   | 3 |
| DOX | 0   | 0   | 0   | 0   | 0   | 0   | 0   | 0   | 0   | 0   | 0   | 0   | 0   | 0   | 21  | 21  | 21  | 0   | 0   | 0   | 0   | 0   | 0   | 0   |     |     | 0   | 0   | 0   | 0   | 0   | 0   | 0   | 0   | 0   | 0   | 0  | 0   | 0 |
| TGC | 0   | 0   | 0   | 14  | 0   | 0   | 18  | 0   | 9   | 0   | 0   | 25  | 0   | 0   | 12  | 1   | 50  | 4   | 0   | 14  | 0   | 0   | 0   | 0   | 22  | 4   |     |     |     |     | 17  | 0   | 4   | 0   | 0   | 0   | 0  | 0   | 0 |
| MIN | 0   | 0   | 0   | 0   | 2   | 0   | 0   | 0   | 0   | 0   | 0   | 0   | 0   | 0   | 1   | 3   | 0   | 0   | 0   | 0   | 0   | 0   | 0   | 0   | 0   | 0   |     |     |     |     |     | 0   | 0   | 0   | 0   | 0   | 0  | 0   |   |
| ERV | 0   | 0   | 0   | 0   | 0   | 0   | 0   | 0   | 0   | 0   | 0   | 0   | 0   | 0   | 0   | 0   | 0   | 0   | 0   | 0   | 0   | 0   | 0   | 3   | 0   | 0   |     |     |     |     | 0   | 0   | 0   | 0   | 0   | 0   | 0  | 0   | 0 |
| RIF | 0   | 0   | 56  | 15  | 7   | 0   | 0   | 0   | 9   | 0   | 0   | 0   | 0   | 0   | 61  | 78  | 23  | 0   | 0   | 8   | 0   | 0   | 0   | 0   | 87  | 3   | 0   | 17  | 0   | 0   |     |     | 50  | 0   | 7   | 0   | 0  | 0   | 0 |
| RFB | 0   | 0   | 0   | 0   | 0   | 0   | 0   | 0   | 0   | 0   | 0   | 0   | 0   | 0   | 0   | 0   | 0   | 0   | 0   | 0   | 0   | 0   | 0   | 3   | 0   | 0   | 0   | 0   | 0   | 0   |     |     | 0   | 0   | 0   | 0   | 0  | 0   | 0 |

|     | AZM | ATM | SUL | SAM | CFS | TZB | TZP | CRO | CAZ | FEP | CIP | LVX | MXF | ETP | IMP | MEM | DOR | CZA | AVI | AMK | GEN | TOB | NET | PLZ | CST | PMB | DOX | TGC | MIN | ERV | RIF | RFB | FOF | TMP | SXT | CHL | FA | VAN |
|-----|-----|-----|-----|-----|-----|-----|-----|-----|-----|-----|-----|-----|-----|-----|-----|-----|-----|-----|-----|-----|-----|-----|-----|-----|-----|-----|-----|-----|-----|-----|-----|-----|-----|-----|-----|-----|----|-----|
| FOF | 0   | 0   | 56  | 0   | 0   | 0   | 0   | 0   | 0   | 0   | 2   | 1   | 0   | 0   | 45  | 79  | 3   | 0   | 0   | 29  | 13  | 2   | 0   | 9   | 9   | 3   | 0   | 4   | 0   | 0   | 50  | 0   |     | 0   | 0   | 0   | 0  | 0   |
| TMP | 0   | 0   | 0   | 0   | 0   | 0   | 0   | 0   | 0   | 0   | 0   | 0   | 0   | 0   | 0   | 0   | 0   | 0   | 0   | 0   | 0   | 0   | 0   | 1   | 0   | 0   | 0   | 0   | 0   | 0   | 0   | 0   |     |     |     | 0   | 0  | 0   |
| SXT | 6   | 7   | 0   | 7   | 0   | 0   | 0   | 0   | 7   | 0   | 0   | 0   | 0   | 0   | 0   | 7   | 0   | 0   | 0   | 6   | 0   | 0   | 0   | 0   | 9   | 0   | 0   | 0   | 0   | 0   | 7   | 0   | 0   |     |     | 0   | 0  | 7   |
| CHL | 0   | 0   | 0   | 0   | 0   | 0   | 0   | 0   | 0   | 0   | 0   | 0   | 0   | 0   | 0   | 0   | 0   | 0   | 0   | 0   | 0   | 0   | 0   | 2   | 0   | 0   | 0   | 0   | 0   | 0   | 0   | 0   | 0   | 0   | 0   | 0   | 0  | 0   |
| FA  | 0   | 0   | 0   | 0   | 0   | 0   | 0   | 0   | 0   | 0   | 0   | 0   | 0   | 0   | 0   | 0   | 0   | 0   | 0   | 0   | 0   | 0   | 0   | 6   | 0   | 0   | 0   | 0   | 0   | 0   | 0   | 0   | 0   | 0   | 0   | 0   | 0  | 0   |
| VAN | 0   | 0   | 0   | 0   | 0   | 0   | 0   | 0   | 9   | 0   | 0   | 0   | 0   | 0   | 0   | 5   | 3   | 0   | 0   | 0   | 0   | 0   | 0   | 36  | 3   | 0   | 0   | 0   | 0   | 0   | 0   | 0   | 0   | 0   | 7   | 0   | 0  |     |
| TEC | 8   | 9   | 0   | 8   | 0   | 0   | 0   | 0   | 9   | 0   | 0   | 0   | 0   | 0   | 0   | 9   | 0   | 0   | 0   | 0   | 0   | 0   | 0   | 9   | 0   | 0   | 0   | 0   | 0   | 0   | 0   | 0   | 0   | 0   | 0   | 0   | 0  | 0   |
| DAP | 0   | 0   | 0   | 0   | 0   | 0   | 0   | 0   | 0   | 0   | 0   | 0   | 0   | 0   | 0   | 0   | 0   | 0   | 0   | 0   | 0   | 0   | 0   | 6   | 0   | 0   | 0   | 0   | 0   | 0   | 0   | 0   | 0   | 0   | 0   | 0   | 0  | 0   |
| LZD | 0   | 0   | 0   | 0   | 0   | 0   | 0   | 0   | 0   | 0   | 0   | 0   | 0   | 0   | 0   | 0   | 0   | 0   | 0   | 0   | 0   | 0   | 0   | 0   | 0   | 0   | 0   | 0   | 0   | 3   | 0   | 0   | 0   | 0   | 0   | 0   | 0  | 0   |

|  |       |       |
|--|-------|-------|
|  | 1-5   | 21-30 |
|  | 6-10  | 31-40 |
|  | 11-15 | 41-50 |
|  | 16-20 | 51-60 |
|  |       | >60   |

### 3.5 Number of studies per combinations (only double combinations shown) tested by checkerboard method

|     | AZM | ATM | SUL | SAM | CFS | TZB | TZP | CRO | CAZ | FEP | CIP | LVX | MXF | IMP | MEM | DOR | AMK | GEN | TOB | PLZ | CST | PMB | TGC | MIN | ERV | RIF | RFB | FOF | TMP | SXT | CHL | FA |   |   |
|-----|-----|-----|-----|-----|-----|-----|-----|-----|-----|-----|-----|-----|-----|-----|-----|-----|-----|-----|-----|-----|-----|-----|-----|-----|-----|-----|-----|-----|-----|-----|-----|----|---|---|
| AZM |     | 0   | 0   | 0   | 0   | 0   | 0   | 0   | 1   | 0   | 1   | 0   | 0   | 1   | 1   | 0   | 1   | 0   | 0   | 0   | 1   | 0   | 0   | 0   | 0   | 0   | 0   | 0   | 0   | 0   | 0   | 0  |   |   |
| ATM | 0   |     | 0   | 0   | 0   | 0   | 0   | 0   | 0   | 0   | 0   | 0   | 0   | 0   | 0   | 0   | 0   | 0   | 0   | 0   | 1   | 0   | 0   | 0   | 0   | 0   | 0   | 0   | 0   | 0   | 0   | 0  |   |   |
| SUL | 0   | 0   |     |     |     | 0   | 0   | 1   | 1   | 1   | 1   | 0   | 0   | 2   | 6   | 0   | 0   | 1   | 0   | 0   | 0   | 1   | 0   | 0   | 0   | 1   | 0   | 2   | 0   | 0   | 0   | 0  |   |   |
| SAM | 0   | 0   |     |     |     | 0   | 0   | 0   | 0   | 1   | 0   | 1   | 0   | 0   | 0   | 2   | 1   | 0   | 0   | 0   | 0   | 0   | 2   | 0   | 2   | 0   | 0   | 1   | 0   | 0   | 0   | 0  | 0 | 0 |
| CFS | 0   | 0   |     |     |     | 0   | 0   | 0   | 0   | 0   | 0   | 0   | 0   | 0   | 1   | 1   | 1   | 0   | 0   | 0   | 0   | 0   | 1   | 0   | 0   | 1   | 0   | 1   | 0   | 0   | 0   | 0  | 0 | 0 |
| TZB | 0   | 0   | 0   | 0   | 0   |     | 0   | 0   | 0   | 0   | 0   | 0   | 0   | 0   | 2   | 0   | 0   | 0   | 0   | 0   | 0   | 0   | 0   | 0   | 0   | 0   | 0   | 0   | 0   | 0   | 0   | 0  |   |   |
| TZP | 0   | 0   | 0   | 0   | 0   | 0   |     | 0   | 0   | 0   | 0   | 0   | 0   | 0   | 0   | 0   | 0   | 0   | 0   | 0   | 0   | 0   | 1   | 0   | 0   | 0   | 0   | 0   | 0   | 0   | 0   | 0  |   |   |
| CRO | 0   | 0   | 1   | 0   | 0   | 0   |     |     | 0   | 0   | 0   | 0   | 0   | 0   | 0   | 0   | 0   | 0   | 0   | 0   | 0   | 0   | 0   | 0   | 0   | 0   | 0   | 0   | 0   | 0   | 0   | 0  |   |   |
| CAZ | 1   | 0   | 1   | 0   | 0   | 0   | 0   | 0   |     | 0   | 0   | 0   | 0   | 0   | 0   | 0   | 0   | 0   | 0   | 0   | 1   | 0   | 0   | 0   | 0   | 0   | 0   | 0   | 0   | 0   | 0   | 0  |   |   |
| FEP | 0   | 0   | 1   | 1   | 0   | 0   | 0   | 0   | 0   |     | 0   | 0   | 0   | 0   | 0   | 0   | 0   | 0   | 0   | 0   | 0   | 0   | 0   | 0   | 0   | 0   | 0   | 0   | 0   | 0   | 0   | 0  |   |   |
| CIP | 1   | 0   | 1   | 0   | 0   | 0   | 0   | 0   | 0   | 0   |     | 0   | 0   | 0   | 2   | 0   | 1   | 0   | 0   | 0   | 0   | 0   | 0   | 0   | 0   | 0   | 0   | 1   | 0   | 0   | 0   | 0  |   |   |
| LVX | 0   | 0   | 0   | 1   | 0   | 0   | 0   | 0   | 0   | 0   | 0   |     | 0   | 0   | 0   | 0   | 0   | 0   | 0   | 0   | 2   | 0   | 2   | 0   | 0   | 0   | 0   | 1   | 0   | 0   | 0   | 0  |   |   |
| MXF | 0   | 0   | 0   | 0   | 1   | 0   | 0   | 0   | 0   | 0   | 0   | 0   |     | 0   | 0   | 0   | 0   | 0   | 0   | 0   | 0   | 0   | 0   | 0   | 0   | 0   | 0   | 0   | 0   | 0   | 0   | 0  |   |   |
| IMP | 1   | 0   | 2   | 0   | 1   | 0   | 0   | 0   | 0   | 0   | 0   | 0   | 0   |     | 1   | 0   | 2   | 0   | 0   | 1   | 2   | 0   | 1   | 0   | 0   | 2   | 0   | 3   | 0   | 0   | 0   | 0  |   |   |
| MEM | 1   | 0   | 6   | 2   | 1   | 2   | 0   | 0   | 0   | 0   | 2   | 0   | 0   | 1   |     | 0   | 3   | 0   | 0   | 1   | 6   | 1   | 0   | 1   | 0   | 1   | 0   | 4   | 0   | 0   | 0   | 0  |   |   |
| DOR | 0   | 0   | 0   | 1   | 0   | 0   | 0   | 0   | 0   | 0   | 0   | 0   | 0   | 0   | 0   |     | 1   | 0   | 0   | 0   | 3   | 0   | 1   | 0   | 0   | 1   | 0   | 1   | 0   | 0   | 0   | 0  |   |   |
| AMK | 1   | 0   | 0   | 0   | 0   | 0   | 0   | 0   | 0   | 0   | 1   | 0   | 0   | 2   | 3   | 1   |     | 0   | 0   | 0   | 1   | 0   | 1   | 0   | 0   | 0   | 0   | 2   | 0   | 0   | 0   | 0  |   |   |
| GEN | 0   | 0   | 1   | 0   | 0   | 0   | 0   | 0   | 0   | 0   | 0   | 0   | 0   | 0   | 0   | 0   | 0   |     | 0   | 0   | 1   | 0   | 0   | 0   | 0   | 0   | 0   | 2   | 0   | 0   | 0   | 0  |   |   |
| TOB | 0   | 0   | 0   | 0   | 0   | 0   | 0   | 0   | 0   | 0   | 0   | 0   | 0   | 0   | 0   | 0   | 0   | 0   |     | 0   | 0   | 0   | 0   | 0   | 0   | 0   | 0   | 1   | 0   | 0   | 0   | 0  |   |   |
| PLZ | 0   | 0   | 0   | 0   | 0   | 0   | 0   | 0   | 0   | 0   | 0   | 0   | 0   | 1   | 1   | 0   | 0   | 0   | 0   |     | 0   | 0   | 0   | 0   | 0   | 0   | 0   | 1   | 0   | 0   | 0   | 0  |   |   |
| CST | 1   | 1   | 0   | 2   | 1   | 0   | 0   | 0   | 1   | 0   | 0   | 2   | 0   | 2   | 6   | 3   | 1   | 1   | 0   | 0   |     |     | 2   | 0   | 1   | 5   | 1   | 2   | 1   | 2   | 1   | 2  |   |   |
| PMB | 0   | 0   | 1   | 0   | 0   | 0   | 0   | 0   | 0   | 0   | 0   | 0   | 0   | 0   | 1   | 0   | 0   | 0   | 0   |     |     |     |     | 1   | 0   | 0   | 1   | 0   | 1   | 0   | 0   | 0  | 0 |   |
| TGC | 0   | 0   | 0   | 2   | 0   | 0   | 1   | 0   | 0   | 0   | 0   | 2   | 0   | 1   | 0   | 1   | 1   | 0   | 0   | 2   |     |     | 1   |     |     |     | 2   | 0   | 1   | 0   | 0   | 0  | 0 |   |
| MIN | 0   | 0   | 0   | 0   | 1   | 0   | 0   | 0   | 0   | 0   | 0   | 0   | 0   | 0   | 1   | 0   | 0   | 0   | 0   | 0   | 0   |     |     |     |     |     |     | 0   | 0   | 0   | 0   | 0  | 0 | 0 |
| ERV | 0   | 0   | 0   | 0   | 0   | 0   | 0   | 0   | 0   | 0   | 0   | 0   | 0   | 0   | 0   | 0   | 0   | 0   | 0   | 0   | 1   | 0   |     |     |     |     |     |     | 0   | 0   | 0   | 0  | 0 | 0 |
| RIF | 0   | 0   | 1   | 1   | 1   | 0   | 0   | 0   | 0   | 0   | 0   | 0   | 0   | 2   | 1   | 1   | 0   | 0   | 0   | 0   | 5   | 1   | 2   | 0   | 0   |     |     | 1   | 0   | 0   | 0   | 0  |   |   |
| RFB | 0   | 0   | 0   | 0   | 0   | 0   | 0   | 0   | 0   | 0   | 0   | 0   | 0   | 0   | 0   | 0   | 0   | 0   | 0   | 1   | 0   | 0   | 0   | 0   |     |     |     |     | 0   | 0   | 0   | 0  | 0 |   |
| FOF | 0   | 0   | 2   | 0   | 0   | 0   | 0   | 0   | 0   | 0   | 1   | 1   | 0   | 3   | 4   | 1   | 2   | 2   | 1   | 1   | 2   | 1   | 1   | 0   | 0   |     |     | 1   | 0   |     | 0   | 0  | 0 | 0 |
| TMP | 0   | 0   | 0   | 0   | 0   | 0   | 0   | 0   | 0   | 0   | 0   | 0   | 0   | 0   | 0   | 0   | 0   | 0   | 0   | 0   | 1   | 0   | 0   | 0   | 0   | 0   | 0   | 0   |     |     |     | 0  | 0 |   |
| SXT | 0   | 0   | 0   | 0   | 0   | 0   | 0   | 0   | 0   | 0   | 0   | 0   | 0   | 0   | 0   | 0   | 0   | 0   | 0   | 0   | 2   | 0   | 0   | 0   | 0   | 0   | 0   | 0   |     |     |     | 0  | 0 |   |
| CHL | 0   | 0   | 0   | 0   | 0   | 0   | 0   | 0   | 0   | 0   | 0   | 0   | 0   | 0   | 0   | 0   | 0   | 0   | 0   | 0   | 1   | 0   | 0   | 0   | 0   | 0   | 0   | 0   | 0   | 0   |     | 0  | 0 |   |
| FA  | 0   | 0   | 0   | 0   | 0   | 0   | 0   | 0   | 0   | 0   | 0   | 0   | 0   | 0   | 0   | 0   | 0   | 0   | 0   | 0   | 2   | 0   | 0   | 0   | 0   | 0   | 0   | 0   | 0   | 0   | 0   |    | 0 |   |
| VAN | 0   | 0   | 0   | 0   | 0   | 0   | 0   | 0   | 0   | 0   | 0   | 0   | 0   | 0   | 1   | 1   | 0   | 0   | 0   | 0   | 7   | 1   | 0   | 0   | 0   | 0   | 0   | 0   | 0   | 0   | 0   | 0  | 0 |   |
| TEC | 0   | 0   | 0   | 0   | 0   | 0   | 0   | 0   | 0   | 0   | 0   | 0   | 0   | 0   | 0   | 0   | 0   | 0   | 0   | 0   | 1   | 0   | 0   | 0   | 0   | 0   | 0   | 0   | 0   | 0   | 0   | 0  | 0 |   |
| LZD | 0   | 0   | 0   | 0   | 0   | 0   | 0   | 0   | 0   | 0   | 0   | 0   | 0   | 0   | 0   | 0   | 0   | 0   | 0   | 0   | 0   | 0   | 0   | 0   | 0   | 1   | 0   | 0   | 0   | 0   | 0   | 0  | 0 |   |

|  |           |  |           |
|--|-----------|--|-----------|
|  | 1 study   |  | 6 studies |
|  | 2 studies |  | 7 studies |
|  | 3 studies |  | 8 studies |
|  | 4 studies |  | 9 studies |

3.6 Number of eligible isolates per combination (only double combinations are shown) tested by checkerboard method

|     | AZM | ATM | SUL | SAM | CFS | TZB | TZP | CRO | CAZ | FEP | CIP | LVX | MXF | IMP | MEM | DOR | AMK | GEN | TOB | PLZ | CST | PMB | TGC | MIN | ERV | RIF | RFB | FOF | TMP | SXT | CHL | FA | VAN |   |
|-----|-----|-----|-----|-----|-----|-----|-----|-----|-----|-----|-----|-----|-----|-----|-----|-----|-----|-----|-----|-----|-----|-----|-----|-----|-----|-----|-----|-----|-----|-----|-----|----|-----|---|
| AZM |     | 0   | 0   | 0   | 0   | 0   | 0   | 0   | 3   | 0   | 3   | 0   | 0   | 2   | 12  | 0   | 2   | 0   | 0   | 0   | 8   | 0   | 0   | 0   | 0   | 0   | 0   | 0   | 0   | 0   | 0   | 0  | 0   |   |
| ATM | 0   |     | 0   | 0   | 0   | 0   | 0   | 0   | 0   | 0   | 0   | 0   | 0   | 0   | 0   | 0   | 0   | 0   | 0   | 0   | 9   | 0   | 0   | 0   | 0   | 0   | 0   | 0   | 0   | 0   | 0   | 0  | 0   |   |
| SUL | 0   | 0   |     |     |     | 0   | 0   | 10  | 10  | 9   | 10  | 0   | 0   | 10  | 173 | 0   | 0   | 10  | 0   | 0   | 0   | 3   | 0   | 0   | 0   | 50  | 0   | 56  | 0   | 0   | 0   | 0  | 0   |   |
| SAM | 0   | 0   |     |     |     | 0   | 0   | 2   | 0   | 7   | 0   | 0   | 10  | 1   | 0   | 0   | 0   | 0   | 10  | 0   | 13  | 0   | 0   | 7   | 0   | 0   | 0   | 0   | 0   | 0   | 0   | 0  | 0   | 0 |
| CFS | 0   | 0   |     |     |     | 0   | 0   | 0   | 0   | 0   | 0   | 0   | 80  | 16  | 11  | 0   | 0   | 0   | 0   | 0   | 3   | 0   | 0   | 2   | 0   | 7   | 0   | 0   | 0   | 0   | 0   | 0  | 0   | 0 |
| TZB | 0   | 0   | 0   | 0   | 0   |     | 0   | 0   | 0   | 0   | 0   | 0   | 0   | 0   | 59  | 0   | 0   | 0   | 0   | 0   | 0   | 0   | 0   | 0   | 0   | 0   | 0   | 0   | 0   | 0   | 0   | 0  | 0   |   |
| TZP | 0   | 0   | 0   | 0   | 0   | 0   |     | 0   | 0   | 0   | 0   | 0   | 0   | 0   | 0   | 0   | 0   | 0   | 0   | 0   | 0   | 0   | 18  | 0   | 0   | 0   | 0   | 0   | 0   | 0   | 0   | 0  | 0   |   |
| CRO | 0   | 0   | 10  | 0   | 0   | 0   |     |     | 0   | 0   | 0   | 0   | 0   | 0   | 0   | 0   | 0   | 0   | 0   | 0   | 0   | 0   | 0   | 0   | 0   | 0   | 0   | 0   | 0   | 0   | 0   | 0  | 0   |   |
| CAZ | 3   | 0   | 10  | 0   | 0   | 0   | 0   | 0   |     | 0   | 0   | 0   | 0   | 0   | 0   | 0   | 0   | 0   | 0   | 0   | 9   | 0   | 0   | 0   | 0   | 0   | 0   | 0   | 0   | 0   | 0   | 0  | 0   |   |
| FEP | 0   | 0   | 9   | 2   | 0   | 0   | 0   | 0   | 0   |     | 0   | 0   | 0   | 0   | 0   | 0   | 0   | 0   | 0   | 0   | 0   | 0   | 0   | 0   | 0   | 0   | 0   | 0   | 0   | 0   | 0   | 0  | 0   |   |
| CIP | 3   | 0   | 10  | 0   | 0   | 0   | 0   | 0   | 0   | 0   |     | 0   | 0   | 0   | 45  | 0   | 34  | 0   | 0   | 0   | 0   | 0   | 0   | 0   | 0   | 0   | 0   | 0   | 2   | 0   | 0   | 0  | 0   |   |
| LVX | 0   | 0   | 0   | 7   | 0   | 0   | 0   | 0   | 0   | 0   | 0   |     | 0   | 0   | 0   | 0   | 0   | 0   | 0   | 0   | 2   | 0   | 25  | 0   | 0   | 0   | 0   | 1   | 0   | 0   | 0   | 0  | 0   |   |
| MXF | 0   | 0   | 0   | 0   | 80  | 0   | 0   | 0   | 0   | 0   | 0   | 0   |     | 0   | 0   | 0   | 0   | 0   | 0   | 0   | 0   | 0   | 0   | 0   | 0   | 0   | 0   | 0   | 0   | 0   | 0   | 0  | 0   |   |
| IMP | 2   | 0   | 10  | 0   | 16  | 0   | 0   | 0   | 0   | 0   | 0   | 0   | 0   |     | 21  | 0   | 4   | 0   | 0   | 8   | 10  | 0   | 12  | 0   | 0   | 28  | 0   | 45  | 0   | 0   | 0   | 0  | 0   |   |
| MEM | 12  | 0   | 173 | 10  | 11  | 59  | 0   | 0   | 0   | 0   | 45  | 0   | 0   | 21  |     | 0   | 45  | 0   | 0   | 4   | 29  | 3   | 0   | 3   | 0   | 50  | 0   | 79  | 0   | 0   | 0   | 0  | 5   |   |
| DOR | 0   | 0   | 0   | 1   | 0   | 0   | 0   | 0   | 0   | 0   | 0   | 0   | 0   | 0   | 0   |     | 4   | 0   | 0   | 0   | 6   | 0   | 3   | 0   | 0   | 1   | 0   | 3   | 0   | 0   | 0   | 0  | 3   |   |
| AMK | 2   | 0   | 0   | 0   | 0   | 0   | 0   | 0   | 0   | 0   | 34  | 0   | 0   | 4   | 45  | 4   |     | 0   | 0   | 0   | 6   | 0   | 14  | 0   | 0   | 0   | 0   | 29  | 0   | 0   | 0   | 0  | 0   |   |
| GEN | 0   | 0   | 10  | 0   | 0   | 0   | 0   | 0   | 0   | 0   | 0   | 0   | 0   | 0   | 0   | 0   | 0   |     | 0   | 0   | 1   | 0   | 0   | 0   | 0   | 0   | 0   | 13  | 0   | 0   | 0   | 0  | 0   |   |
| TOB | 0   | 0   | 0   | 0   | 0   | 0   | 0   | 0   | 0   | 0   | 0   | 0   | 0   | 0   | 0   | 0   | 0   | 0   |     | 0   | 0   | 0   | 0   | 0   | 0   | 0   | 0   | 2   | 0   | 0   | 0   | 0  | 0   |   |
| PLZ | 0   | 0   | 0   | 0   | 0   | 0   | 0   | 0   | 0   | 0   | 0   | 0   | 0   | 8   | 4   | 0   | 0   | 0   | 0   | 0   |     | 0   | 0   | 0   | 0   | 0   | 0   | 9   | 0   | 0   | 0   | 0  | 0   |   |
| CST | 8   | 9   | 0   | 10  | 3   | 0   | 0   | 0   | 9   | 0   | 0   | 2   | 0   | 10  | 29  | 6   | 6   | 1   | 0   | 0   |     |     | 10  | 0   | 3   | 40  | 3   | 9   | 1   | 8   | 2   | 6  | 33  |   |
| PMB | 0   | 0   | 3   | 0   | 0   | 0   | 0   | 0   | 0   | 0   | 0   | 0   | 0   | 0   | 3   | 0   | 0   | 0   | 0   | 0   |     |     | 4   | 0   | 0   | 3   | 0   | 3   | 0   | 0   | 0   | 0  | 3   |   |
| TGC | 0   | 0   | 0   | 13  | 0   | 0   | 18  | 0   | 0   | 0   | 0   | 25  | 0   | 12  | 0   | 3   | 14  | 0   | 0   | 0   | 10  | 4   |     |     |     | 16  | 0   | 4   | 0   | 0   | 0   | 0  | 0   |   |
| MIN | 0   | 0   | 0   | 0   | 2   | 0   | 0   | 0   | 0   | 0   | 0   | 0   | 0   | 0   | 3   | 0   | 0   | 0   | 0   | 0   | 0   | 0   |     |     |     | 0   | 0   | 0   | 0   | 0   | 0   | 0  | 0   |   |
| ERV | 0   | 0   | 0   | 0   | 0   | 0   | 0   | 0   | 0   | 0   | 0   | 0   | 0   | 0   | 0   | 0   | 0   | 0   | 0   | 0   | 3   | 0   |     |     |     | 0   | 0   | 0   | 0   | 0   | 0   | 0  | 0   |   |
| RIF | 0   | 0   | 50  | 7   | 7   | 0   | 0   | 0   | 0   | 0   | 0   | 0   | 0   | 28  | 50  | 1   | 0   | 0   | 0   | 0   | 40  | 3   | 16  | 0   | 0   |     |     | 50  | 0   | 0   | 0   | 0  | 0   |   |
| RFB | 0   | 0   | 0   | 0   | 0   | 0   | 0   | 0   | 0   | 0   | 0   | 0   | 0   | 0   | 0   | 0   | 0   | 0   | 0   | 3   | 0   | 0   | 0   | 0   | 0   |     |     | 0   | 0   | 0   | 0   | 0  | 0   |   |
| FOF | 0   | 0   | 56  | 0   | 0   | 0   | 0   | 0   | 0   | 0   | 2   | 1   | 0   | 45  | 79  | 3   | 29  | 13  | 2   | 9   | 9   | 3   | 4   | 0   | 0   | 50  | 0   |     | 0   | 0   | 0   | 0  | 0   |   |
| TMP | 0   | 0   | 0   | 0   | 0   | 0   | 0   | 0   | 0   | 0   | 0   | 0   | 0   | 0   | 0   | 0   | 0   | 0   | 0   | 1   | 0   | 0   | 0   | 0   | 0   | 0   | 0   | 0   |     |     | 0   | 0  | 0   |   |
| SXT | 0   | 0   | 0   | 0   | 0   | 0   | 0   | 0   | 0   | 0   | 0   | 0   | 0   | 0   | 0   | 0   | 0   | 0   | 0   | 8   | 0   | 0   | 0   | 0   | 0   | 0   | 0   | 0   |     |     | 0   | 0  | 0   |   |
| CHL | 0   | 0   | 0   | 0   | 0   | 0   | 0   | 0   | 0   | 0   | 0   | 0   | 0   | 0   | 0   | 0   | 0   | 0   | 0   | 2   | 0   | 0   | 0   | 0   | 0   | 0   | 0   | 0   | 0   | 0   |     | 0  | 0   |   |
| FA  | 0   | 0   | 0   | 0   | 0   | 0   | 0   | 0   | 0   | 0   | 0   | 0   | 0   | 0   | 0   | 0   | 0   | 0   | 0   | 6   | 0   | 0   | 0   | 0   | 0   | 0   | 0   | 0   | 0   | 0   | 0   |    | 0   |   |
| VAN | 0   | 0   | 0   | 0   | 0   | 0   | 0   | 0   | 0   | 0   | 0   | 0   | 0   | 0   | 5   | 3   | 0   | 0   | 0   | 0   | 33  | 3   | 0   | 0   | 0   | 0   | 0   | 0   | 0   | 0   | 0   | 0  |     | 0 |
| TEC | 0   | 0   | 0   | 0   | 0   | 0   | 0   | 0   | 0   | 0   | 0   | 0   | 0   | 0   | 0   | 0   | 0   | 0   | 0   | 9   | 0   | 0   | 0   | 0   | 0   | 0   | 0   | 0   | 0   | 0   | 0   | 0  | 0   | 0 |
| LZD | 0   | 0   | 0   | 0   | 0   | 0   | 0   | 0   | 0   | 0   | 0   | 0   | 0   | 0   | 0   | 0   | 0   | 0   | 0   | 0   | 0   | 0   | 0   | 0   | 0   | 3   | 0   | 0   | 0   | 0   | 0   | 0  | 0   | 0 |

|  |       |  |       |
|--|-------|--|-------|
|  | 1-5   |  | 21-30 |
|  | 6-10  |  | 31-40 |
|  | 11-15 |  | 41-50 |
|  | 16-20 |  | 51-60 |
|  |       |  | >60   |

### 3.7 Number of eligible studies (only double combinations shown) tested by TKA

|     | ATM | SUL | SAM | CFS | CAZ | FEP | CIP | LVX | MXF | IMP | MEM | DOR | CZA | AVI | AMK | GEN | TOB | PLZ | CST | PMB | TGC | MIN | RIF | FOF | TMP | SXT | CHL |   |   |
|-----|-----|-----|-----|-----|-----|-----|-----|-----|-----|-----|-----|-----|-----|-----|-----|-----|-----|-----|-----|-----|-----|-----|-----|-----|-----|-----|-----|---|---|
| ATM |     | 0   | 1   | 0   | 1   | 1   | 0   | 0   | 0   | 0   | 1   | 0   | 0   | 0   | 0   | 0   | 0   | 0   | 0   | 0   | 0   | 0   | 0   | 0   | 0   | 0   | 0   |   |   |
| SUL | 0   |     |     |     | 0   | 0   | 0   | 0   | 0   | 3   | 3   | 1   | 0   | 1   | 0   | 0   | 0   | 0   | 1   | 0   | 0   | 0   | 2   | 2   | 0   | 0   | 0   |   |   |
| SAM | 1   |     |     |     | 0   | 0   | 0   | 0   | 0   | 0   | 0   | 1   | 1   | 0   | 0   | 0   | 0   | 0   | 0   | 0   | 1   | 0   | 0   | 0   | 0   | 0   | 0   | 0 |   |
| CFS | 0   |     |     |     | 0   | 0   | 0   | 0   | 0   | 0   | 0   | 0   | 0   | 0   | 0   | 0   | 0   | 0   | 0   | 0   | 0   | 0   | 0   | 1   | 0   | 0   | 0   | 0 | 0 |
| CAZ | 1   |     |     |     | 0   | 0   | 0   |     | 0   | 0   | 0   | 0   | 0   | 0   | 0   | 0   | 0   | 0   | 0   | 0   | 0   | 0   | 0   | 0   | 0   | 0   | 0   | 0 | 0 |
| FEP | 1   | 0   | 0   | 0   | 0   |     | 0   | 1   | 1   | 0   | 0   | 0   | 0   | 0   | 1   | 0   | 0   | 0   | 0   | 0   | 0   | 0   | 0   | 0   | 0   | 0   | 0   |   |   |
| CIP | 0   | 0   | 0   | 0   | 0   | 0   |     | 0   | 0   | 0   | 0   | 1   | 0   | 0   | 0   | 0   | 0   | 0   | 0   | 0   | 0   | 0   | 0   | 1   | 0   | 0   | 0   |   |   |
| LVX | 0   | 0   | 0   | 0   | 0   | 1   | 0   |     | 0   | 0   | 0   | 2   | 1   | 0   | 1   | 0   | 0   | 0   | 2   | 0   | 1   | 0   | 0   | 0   | 0   | 0   | 0   |   |   |
| MXF | 0   | 0   | 0   | 0   | 0   | 1   | 0   | 0   |     | 0   | 0   | 0   | 0   | 0   | 0   | 0   | 0   | 0   | 0   | 0   | 0   | 0   | 0   | 0   | 0   | 0   | 0   |   |   |
| IMP | 0   | 3   | 1   | 0   | 0   | 0   | 0   | 0   | 0   |     | 0   | 0   | 0   | 0   | 0   | 1   | 0   | 0   | 1   | 1   | 1   | 1   | 5   | 1   | 0   | 0   | 0   |   |   |
| MEM | 1   | 3   | 1   | 0   | 0   | 0   | 0   | 0   | 0   | 0   |     | 0   | 2   | 0   | 0   | 0   | 0   | 0   | 3   | 1   | 1   | 1   | 1   | 0   | 0   | 0   | 0   |   |   |
| DOR | 0   | 1   | 0   | 0   | 0   | 0   | 1   | 2   | 0   | 0   | 0   |     | 0   | 0   | 1   | 0   | 0   | 0   | 5   | 0   | 1   | 0   | 1   | 1   | 0   | 0   | 0   |   |   |
| CZA | 0   | 0   | 0   | 0   | 0   | 0   | 0   | 1   | 0   | 0   | 2   | 0   |     | 0   | 0   | 0   | 1   | 0   | 1   | 0   | 1   | 0   | 0   | 0   | 0   | 0   | 0   |   |   |
| AVI | 0   | 1   | 0   | 0   | 0   | 0   | 0   | 0   | 0   | 0   | 0   | 0   | 0   |     | 0   | 0   | 0   | 0   | 0   | 0   | 0   | 0   | 0   | 0   | 0   | 0   | 0   |   |   |
| AMK | 0   | 0   | 0   | 0   | 0   | 1   | 0   | 1   | 0   | 0   | 0   | 1   | 0   | 0   |     | 0   | 0   | 0   | 0   | 0   | 1   | 0   | 0   | 0   | 0   | 0   | 0   |   |   |
| GEN | 0   | 0   | 0   | 0   | 0   | 0   | 0   | 0   | 0   | 1   | 0   | 0   | 0   | 0   | 0   |     | 0   | 0   | 0   | 0   | 0   | 0   | 0   | 0   | 0   | 0   | 0   |   |   |
| TOB | 0   | 0   | 0   | 0   | 0   | 0   | 0   | 0   | 0   | 0   | 0   | 0   | 1   | 0   | 0   | 0   |     | 0   | 0   | 0   | 0   | 0   | 0   | 0   | 0   | 0   | 0   |   |   |
| PLZ | 0   | 0   | 0   | 0   | 0   | 0   | 0   | 0   | 0   | 0   | 0   | 0   | 0   | 0   | 0   | 0   | 0   |     | 0   | 0   | 0   | 0   | 0   | 1   | 0   | 0   | 0   |   |   |
| CST | 0   | 1   | 0   | 0   | 0   | 0   | 0   | 2   | 0   | 1   | 3   | 5   | 1   | 0   | 0   | 0   | 0   | 0   |     |     | 1   | 0   | 3   | 0   | 1   | 1   | 1   |   |   |
| PMB | 0   | 0   | 1   | 0   | 0   | 0   | 0   | 0   | 0   | 1   | 1   | 0   | 0   | 0   | 0   | 0   | 0   | 0   |     |     |     | 1   | 0   | 1   | 0   | 0   | 0   | 0 |   |
| TGC | 0   | 0   | 0   | 0   | 0   | 0   | 0   | 1   | 0   | 1   | 1   | 1   | 1   | 0   | 1   | 0   | 0   | 0   | 1   | 1   |     |     | 2   | 1   | 0   | 0   | 0   |   |   |
| MIN | 0   | 0   | 0   | 1   | 0   | 0   | 0   | 0   | 0   | 1   | 1   | 0   | 0   | 0   | 0   | 0   | 0   | 0   | 0   | 0   |     |     |     |     | 0   | 0   | 0   | 0 | 0 |
| RIF | 0   | 2   | 0   | 0   | 0   | 0   | 0   | 0   | 0   | 5   | 1   | 1   | 0   | 0   | 0   | 0   | 0   | 0   | 3   | 1   | 2   | 0   |     | 0   | 0   | 0   | 0   |   |   |
| FOF | 0   | 2   | 0   | 0   | 0   | 0   | 1   | 0   | 0   | 1   | 0   | 1   | 0   | 0   | 0   | 0   | 0   | 1   | 0   | 0   | 1   | 0   | 0   |     | 0   | 0   | 0   |   |   |
| TMP | 0   | 0   | 0   | 0   | 0   | 0   | 0   | 0   | 0   | 0   | 0   | 0   | 0   | 0   | 0   | 0   | 0   | 0   | 1   | 0   | 0   | 0   | 0   |     |     |     | 0   |   |   |
| SXT | 0   | 0   | 0   | 0   | 0   | 0   | 0   | 0   | 0   | 0   | 0   | 0   | 0   | 0   | 0   | 0   | 0   | 0   | 1   | 0   | 0   | 0   | 0   |     |     |     |     | 0 |   |
| CHL | 0   | 0   | 0   | 0   | 0   | 0   | 0   | 0   | 0   | 0   | 0   | 0   | 0   | 0   | 0   | 0   | 0   | 0   | 1   | 0   | 0   | 0   | 0   | 0   | 0   | 0   |     |   |   |
| FA  | 0   | 0   | 0   | 0   | 0   | 0   | 0   | 0   | 0   | 0   | 0   | 0   | 0   | 0   | 0   | 0   | 0   | 0   | 2   | 0   | 0   | 0   | 0   | 0   | 0   | 0   | 0   |   |   |
| VAN | 0   | 0   | 0   | 0   | 0   | 0   | 0   | 0   | 0   | 0   | 0   | 1   | 0   | 0   | 0   | 0   | 0   | 0   | 6   | 1   | 0   | 0   | 0   | 0   | 0   | 0   | 0   |   |   |
| DAP | 0   | 0   | 0   | 0   | 0   | 0   | 0   | 0   | 0   | 0   | 0   | 0   | 0   | 0   | 0   | 0   | 0   | 0   | 2   | 0   | 0   | 0   | 0   | 0   | 0   | 0   | 0   |   |   |

|  |           |  |           |
|--|-----------|--|-----------|
|  | 1 study   |  | 6 studies |
|  | 2 studies |  | 7 studies |
|  | 3 studies |  | 8 studies |
|  | 4 studies |  | 9 studies |

### 3.8 Number of eligible isolates (only double combinations shown) tested by TKA

|     | ATM | SUL | SAM | CFS | CAZ | FEP | CIP | LVX | MXF | IMP | MEM | DOR | CZA | AVI | AMK | GEN | TOB | PLZ | CST | PMB | TGC | MIN | RIF | FOF | TMP | SXT | CHL |   |   |
|-----|-----|-----|-----|-----|-----|-----|-----|-----|-----|-----|-----|-----|-----|-----|-----|-----|-----|-----|-----|-----|-----|-----|-----|-----|-----|-----|-----|---|---|
| ATM |     | 0   | 1   | 0   | 3   | 3   | 0   | 0   | 0   | 0   | 1   | 0   | 0   | 0   | 0   | 0   | 0   | 0   | 0   | 0   | 0   | 0   | 0   | 0   | 0   | 0   | 0   |   |   |
| SUL | 0   |     |     |     | 0   | 0   | 0   | 0   | 0   | 6   | 54  | 17  | 0   | 1   | 0   | 0   | 0   | 0   | 0   | 6   | 0   | 0   | 0   | 6   | 10  | 0   | 0   | 0 |   |
| SAM | 1   |     |     |     | 0   | 0   | 0   | 0   | 0   | 0   | 6   | 2   | 0   | 0   | 0   | 0   | 0   | 0   | 0   | 0   | 0   | 2   | 0   | 0   | 0   | 0   | 0   | 0 | 0 |
| CFS | 0   |     |     |     | 0   | 0   | 0   | 0   | 0   | 0   | 0   | 0   | 0   | 0   | 0   | 0   | 0   | 0   | 0   | 0   | 0   | 0   | 0   | 0   | 2   | 0   | 0   | 0 | 0 |
| CAZ | 3   | 0   | 0   | 0   |     | 0   | 0   | 0   | 0   | 0   | 0   | 0   | 0   | 0   | 0   | 0   | 0   | 0   | 0   | 0   | 0   | 0   | 0   | 0   | 0   | 0   | 0   |   |   |
| FEP | 3   | 0   | 0   | 0   | 0   |     | 0   | 1   | 2   | 0   | 0   | 0   | 0   | 0   | 1   | 0   | 0   | 0   | 0   | 0   | 0   | 0   | 0   | 0   | 0   | 0   | 0   |   |   |
| CIP | 0   | 0   | 0   | 0   | 0   | 0   |     | 0   | 0   | 0   | 0   | 1   | 0   | 0   | 0   | 0   | 0   | 0   | 0   | 0   | 0   | 0   | 0   | 1   | 0   | 0   | 0   |   |   |
| LVX | 0   | 0   | 0   | 0   | 0   | 1   | 0   |     | 0   | 0   | 0   | 6   | 4   | 0   | 1   | 0   | 0   | 0   | 2   | 0   | 2   | 0   | 0   | 0   | 0   | 0   | 0   |   |   |
| MXF | 0   | 0   | 0   | 0   | 0   | 2   | 0   | 0   |     | 0   | 0   | 0   | 0   | 0   | 0   | 0   | 0   | 0   | 0   | 0   | 0   | 0   | 0   | 0   | 0   | 0   | 0   |   |   |
| IMP | 0   | 6   | 6   | 0   | 0   | 0   | 0   | 0   | 0   |     | 0   | 0   | 0   | 0   | 0   | 2   | 0   | 0   | 2   | 1   | 1   | 1   | 13  | 9   | 0   | 0   | 0   |   |   |
| MEM | 1   | 54  | 2   | 0   | 0   | 0   | 0   | 0   | 0   | 0   |     | 0   | 15  | 0   | 0   | 0   | 0   | 0   | 4   | 2   | 1   | 3   | 2   | 0   | 0   | 0   | 0   |   |   |
| DOR | 0   | 17  | 0   | 0   | 0   | 0   | 1   | 6   | 0   | 0   | 0   |     | 0   | 0   | 2   | 0   | 0   | 0   | 33  | 0   | 45  | 0   | 5   | 1   | 0   | 0   | 0   |   |   |
| CZA | 0   | 0   | 0   | 0   | 0   | 0   | 0   | 4   | 0   | 0   | 15  | 0   |     | 0   | 0   | 0   | 2   | 0   | 2   | 0   | 4   | 0   | 0   | 0   | 0   | 0   | 0   |   |   |
| AVI | 0   | 1   | 0   | 0   | 0   | 0   | 0   | 0   | 0   | 0   | 0   | 0   | 0   |     | 0   | 0   | 0   | 0   | 0   | 0   | 0   | 0   | 0   | 0   | 0   | 0   | 0   |   |   |
| AMK | 0   | 0   | 0   | 0   | 0   | 1   | 0   | 1   | 0   | 0   | 0   | 2   | 0   | 0   |     | 0   | 0   | 0   | 0   | 0   | 0   | 1   | 0   | 0   | 0   | 0   | 0   |   |   |
| GEN | 0   | 0   | 0   | 0   | 0   | 0   | 0   | 0   | 0   | 2   | 0   | 0   | 0   | 0   | 0   |     | 0   | 0   | 0   | 0   | 0   | 0   | 0   | 0   | 0   | 0   | 0   |   |   |
| TOB | 0   | 0   | 0   | 0   | 0   | 0   | 0   | 0   | 0   | 0   | 0   | 0   | 2   | 0   | 0   | 0   |     | 0   | 0   | 0   | 0   | 0   | 0   | 0   | 0   | 0   | 0   |   |   |
| PLZ | 0   | 0   | 0   | 0   | 0   | 0   | 0   | 0   | 0   | 0   | 0   | 0   | 0   | 0   | 0   | 0   | 0   |     | 0   | 0   | 0   | 0   | 0   | 2   | 0   | 0   | 0   |   |   |
| CST | 0   | 6   | 0   | 0   | 0   | 0   | 0   | 2   | 0   | 2   | 4   | 33  | 2   | 0   | 0   | 0   | 0   | 0   |     |     |     | 12  | 0   | 7   | 0   | 1   | 1   | 2 |   |
| PMB | 0   | 0   | 2   | 0   | 0   | 0   | 0   | 0   | 0   | 1   | 2   | 0   | 0   | 0   | 0   | 0   | 0   | 0   | 0   |     | 4   |     | 0   | 3   | 0   | 0   | 0   |   |   |
| TGC | 0   | 0   | 0   | 0   | 0   | 0   | 0   | 2   | 0   | 1   | 1   | 45  | 4   | 0   | 1   | 0   | 0   | 0   | 12  | 4   |     |     | 4   | 1   | 0   | 0   | 0   |   |   |
| MIN | 0   | 0   | 0   | 2   | 0   | 0   | 0   | 0   | 0   | 1   | 3   | 0   | 0   | 0   | 0   | 0   | 0   | 0   | 0   | 0   |     |     | 0   | 0   | 0   | 0   | 0   |   |   |
| RIF | 0   | 6   | 0   | 0   | 0   | 0   | 0   | 0   | 0   | 13  | 2   | 5   | 0   | 0   | 0   | 0   | 0   | 0   | 7   | 3   | 4   | 0   |     | 0   | 0   | 0   | 0   |   |   |
| FOF | 0   | 10  | 0   | 0   | 0   | 0   | 1   | 0   | 0   | 9   | 0   | 1   | 0   | 0   | 0   | 0   | 0   | 2   | 0   | 0   | 1   | 0   | 0   |     | 0   | 0   | 0   |   |   |
| TMP | 0   | 0   | 0   | 0   | 0   | 0   | 0   | 0   | 0   | 0   | 0   | 0   | 0   | 0   | 0   | 0   | 0   | 0   | 1   | 0   | 0   | 0   | 0   | 0   |     |     | 0   |   |   |
| SXT | 0   | 0   | 0   | 0   | 0   | 0   | 0   | 0   | 0   | 0   | 0   | 0   | 0   | 0   | 0   | 0   | 0   | 0   | 1   | 0   | 0   | 0   | 0   | 0   |     |     | 0   |   |   |
| CHL | 0   | 0   | 0   | 0   | 0   | 0   | 0   | 0   | 0   | 0   | 0   | 0   | 0   | 0   | 0   | 0   | 0   | 0   | 2   | 0   | 0   | 0   | 0   | 0   | 0   | 0   |     |   |   |
| FA  | 0   | 0   | 0   | 0   | 0   | 0   | 0   | 0   | 0   | 0   | 0   | 0   | 0   | 0   | 0   | 0   | 0   | 0   | 4   | 0   | 0   | 0   | 0   | 0   | 0   | 0   | 0   |   |   |
| VAN | 0   | 0   | 0   | 0   | 0   | 0   | 0   | 0   | 0   | 0   | 0   | 3   | 0   | 0   | 0   | 0   | 0   | 0   | 20  | 3   | 0   | 0   | 0   | 0   | 0   | 0   | 0   |   |   |
| DAP | 0   | 0   | 0   | 0   | 0   | 0   | 0   | 0   | 0   | 0   | 0   | 0   | 0   | 0   | 0   | 0   | 0   | 0   | 5   | 0   | 0   | 0   | 0   | 0   | 0   | 0   | 0   |   |   |

|  |       |  |       |
|--|-------|--|-------|
|  | 1-5   |  | 21-30 |
|  | 6-10  |  | 31-40 |
|  | 11-15 |  | 41-50 |
|  | 16-20 |  | 51-60 |
|  |       |  | >60   |

### 3.9 Number of eligible studies tested by gradient methods

|     | SUL | SAM | CFS | TZB | MXF | IMP | MEM | DOR | NET | CST | PMB | DOX | TGC | RIF | VAN |
|-----|-----|-----|-----|-----|-----|-----|-----|-----|-----|-----|-----|-----|-----|-----|-----|
| SUL |     |     |     | 0   | 0   | 0   | 2   | 0   | 0   | 0   | 0   | 0   | 0   | 0   | 0   |
| SAM |     |     |     | 0   | 0   | 0   | 0   | 0   | 0   | 0   | 0   | 0   | 0   | 1   | 0   |
| CFS |     |     |     | 0   | 1   | 1   | 1   | 1   | 0   | 0   | 0   | 0   | 0   | 1   | 0   |
| TZB | 0   | 0   | 0   |     | 0   | 0   | 1   | 0   | 0   | 0   | 0   | 0   | 0   | 0   | 0   |
| MXF | 0   | 0   | 1   | 0   |     | 1   | 1   | 1   | 0   | 0   | 0   | 0   | 0   | 0   | 0   |
| IMP | 0   | 0   | 1   | 0   | 1   |     | 0   | 0   | 1   | 1   | 0   | 1   | 0   | 1   | 0   |
| MEM | 2   | 0   | 1   | 1   | 1   | 0   |     | 0   | 1   | 1   | 0   | 1   | 0   | 1   | 0   |
| DOR | 0   | 0   | 1   | 0   | 1   | 0   | 0   |     | 1   | 0   | 0   | 1   | 0   | 1   | 0   |
| NET | 0   | 0   | 0   | 0   | 0   | 1   | 1   | 1   |     | 0   | 0   | 0   | 0   | 0   | 0   |
| CST | 0   | 0   | 0   | 0   | 0   | 1   | 1   | 0   | 0   |     |     | 0   | 0   | 2   | 0   |
| PMB | 0   | 0   | 0   | 0   | 0   | 0   | 0   | 0   | 0   |     |     | 0   | 1   | 1   | 1   |
| DOX | 0   | 0   | 0   | 0   | 0   | 1   | 1   | 1   | 0   | 0   | 0   |     | 0   | 0   | 0   |
| TGC | 0   | 0   | 0   | 0   | 0   | 0   | 0   | 0   | 0   | 0   | 1   | 0   |     | 1   | 0   |
| RIF | 0   | 1   | 1   | 0   | 0   | 1   | 1   | 1   | 0   | 2   | 1   | 0   | 1   |     | 0   |
| VAN | 0   | 0   | 0   | 0   | 0   | 0   | 0   | 0   | 0   | 0   | 1   | 0   | 0   | 0   |     |
| DAP | 0   | 0   | 0   | 0   | 0   | 0   | 0   | 0   | 0   | 1   | 0   | 0   | 0   | 0   | 0   |

|  |           |  |           |
|--|-----------|--|-----------|
|  | 1 study   |  | 6 studies |
|  | 2 studies |  | 7 studies |
|  | 3 studies |  | 8 studies |
|  | 4 studies |  | 9 studies |

### 3.10 Number of eligible isolates tested by gradient methods

|     | SUL | SAM | CFS | TZB | MXF | IMP | MEM | DOR | CST | PMB | DOX | TGC | RIF | VAN | DAP |
|-----|-----|-----|-----|-----|-----|-----|-----|-----|-----|-----|-----|-----|-----|-----|-----|
| SUL |     |     |     | 0   | 0   | 0   | 61  | 0   | 0   | 0   | 0   | 0   | 0   | 0   | 0   |
| SAM |     |     |     | 0   | 0   | 0   | 0   | 0   | 0   | 0   | 0   | 0   | 7   | 0   | 0   |
| CFS |     |     |     | 0   | 80  | 19  | 19  | 19  | 0   | 0   | 0   | 0   | 7   | 0   | 0   |
| TZB | 0   | 0   | 0   |     | 0   | 0   | 54  | 0   | 0   | 0   | 0   | 0   | 0   | 0   | 0   |
| MXF | 0   | 0   | 80  | 0   |     | 21  | 21  | 21  | 0   | 0   | 0   | 0   | 0   | 0   | 0   |
| IMP | 0   | 0   | 19  | 0   | 21  |     | 0   | 0   | 41  | 0   | 21  | 0   | 17  | 0   | 0   |
| MEM | 61  | 0   | 19  | 54  | 21  | 0   |     | 0   | 41  | 0   | 21  | 0   | 17  | 0   | 0   |
| DOR | 0   | 0   | 19  | 0   | 21  | 0   | 0   |     | 0   | 0   | 21  | 0   | 17  | 0   | 0   |
| CST | 0   | 0   | 0   | 0   | 0   | 41  | 41  | 0   |     |     | 0   | 0   | 45  | 0   | 4   |
| PMB | 0   | 0   | 0   | 0   | 0   | 0   | 0   | 0   |     |     | 0   | 4   | 3   | 3   | 0   |
| DOX | 0   | 0   | 0   | 0   | 0   | 21  | 21  | 21  | 0   | 0   |     | 0   | 0   | 0   | 0   |
| TGC | 0   | 0   | 0   | 0   | 0   | 0   | 0   | 0   | 0   | 4   | 0   |     | 3   | 0   | 0   |
| RIF | 0   | 7   | 7   | 0   | 0   | 17  | 17  | 17  | 45  | 3   | 0   | 3   |     | 0   | 0   |
| VAN | 0   | 0   | 0   | 0   | 0   | 0   | 0   | 0   | 0   | 3   | 0   | 0   | 0   |     | 0   |
| DAP | 0   | 0   | 0   | 0   | 0   | 0   | 0   | 0   | 4   | 0   | 0   | 0   | 0   | 0   |     |

|  |       |  |       |
|--|-------|--|-------|
|  | 1-5   |  | 21-30 |
|  | 6-10  |  | 31-40 |
|  | 11-15 |  | 41-50 |
|  | 16-20 |  | 51-60 |
|  |       |  | >60   |

### 3.11 Number of eligible studies tested by disk methods

|     | IMP | MEM | CZA | CST | PMB | RIF | FA | VAN |
|-----|-----|-----|-----|-----|-----|-----|----|-----|
| IMP |     | 0   | 0   | 0   | 0   | 1   | 0  | 0   |
| MEM | 0   |     | 1   | 0   | 0   | 0   | 0  | 0   |
| CZA | 0   | 1   |     | 0   | 0   | 0   | 0  | 0   |
| CST | 0   | 0   | 0   |     |     | 0   | 1  | 0   |
| PMB | 0   | 0   | 0   |     |     | 0   | 0  | 1   |
| RIF | 1   | 0   | 0   | 0   | 0   |     | 0  | 0   |
| FA  | 0   | 0   | 0   | 1   | 0   | 0   |    | 0   |
| VAN | 0   | 0   | 0   | 0   | 1   | 0   | 0  |     |

|  |           |  |           |
|--|-----------|--|-----------|
|  | 1 study   |  | 6 studies |
|  | 2 studies |  | 7 studies |
|  | 3 studies |  | 8 studies |
|  | 4 studies |  | 9 studies |

### 3.12 Number of eligible isolates tested by disk methods

|     | IMP | MEM | CZA | CST | PMB | RIF | FA | VAN |
|-----|-----|-----|-----|-----|-----|-----|----|-----|
| IMP |     | 0   | 0   | 0   | 0   | 1   | 0  | 0   |
| MEM | 0   |     | 11  | 0   | 0   | 0   | 0  | 0   |
| CZA | 0   | 11  |     | 0   | 0   | 0   | 0  | 0   |
| CST | 0   | 0   | 0   |     |     | 0   | 3  | 0   |
| PMB | 0   | 0   | 0   |     |     | 0   | 0  | 3   |
| RIF | 1   | 0   | 0   | 0   | 0   |     | 0  | 0   |
| FA  | 0   | 0   | 0   | 3   | 0   | 0   |    | 0   |
| VAN | 0   | 0   | 0   | 0   | 3   | 0   | 0  |     |

|  |       |  |       |
|--|-------|--|-------|
|  | 1-5   |  | 21-30 |
|  | 6-10  |  | 31-40 |
|  | 11-15 |  | 41-50 |
|  | 16-20 |  | 51-60 |
|  |       |  | >60   |

### 3.13 Number of eligible studies tested by agar dilution method

|     | SUL | IMP | MEM | AVI |
|-----|-----|-----|-----|-----|
| SUL |     | 1   | 1   | 1   |
| IMP | 1   |     | 0   | 0   |
| MEM | 1   | 0   |     | 0   |
| AVI | 1   | 0   | 0   |     |

|           |           |
|-----------|-----------|
| 1 study   | 6 studies |
| 2 studies | 7 studies |
| 3 studies | 8 studies |
| 4 studies | 9 studies |

### 3.14 Number of eligible isolates tested by agar dilution method

|     | SUL | IMP | MEM | AVI |
|-----|-----|-----|-----|-----|
| SUL |     | 4   | 4   | 38  |
| IMP | 4   |     | 0   | 0   |
| MEM | 4   | 0   |     | 0   |
| AVI | 38  | 0   | 0   |     |

|       |       |
|-------|-------|
| 1-5   | 21-30 |
| 6-10  | 31-40 |
| 11-15 | 41-50 |
| 16-20 | 51-60 |
|       | >60   |

### 3.15 Number of eligible studies (only double combinations shown) tested by dynamic in vitro PK/PD models

|     | SAM | FEP | LVX | ETP | IMP | MEM | DOR | AMK | CST | PMB | TGC | RIF | DAP |
|-----|-----|-----|-----|-----|-----|-----|-----|-----|-----|-----|-----|-----|-----|
| SAM |     | 0   | 0   | 0   | 0   | 1   | 1   | 0   | 0   | 1   | 1   | 0   | 0   |
| FEP | 0   |     | 0   | 0   | 0   | 0   | 0   | 1   | 0   | 0   | 0   | 0   | 0   |
| LVX | 0   | 0   |     | 0   | 0   | 0   | 0   | 1   | 0   | 0   | 0   | 0   | 0   |
| ETP | 0   | 0   | 0   |     | 1   | 0   | 0   | 0   | 0   | 0   | 0   | 0   | 0   |
| IMP | 0   | 0   | 0   | 1   |     | 0   | 0   | 0   | 1   | 0   | 0   | 0   | 0   |
| MEM | 1   | 0   | 0   | 0   | 0   |     | 0   | 0   | 0   | 1   | 0   | 0   | 0   |
| DOR | 1   | 0   | 0   | 0   | 0   | 0   |     | 0   | 0   | 0   | 1   | 0   | 0   |
| AMK | 0   | 1   | 1   | 0   | 0   | 0   | 0   |     | 0   | 0   | 0   | 0   | 0   |
| CST | 0   | 0   | 0   | 0   | 1   | 0   | 0   | 0   |     |     | 0   | 1   | 1   |
| PMB | 1   | 0   | 0   | 0   | 0   | 1   | 0   | 0   |     |     | 0   | 0   | 0   |
| TGC | 1   | 0   | 0   | 0   | 0   | 0   | 1   | 0   | 0   | 0   |     | 0   | 0   |
| MIN | 0   | 0   | 0   | 0   | 0   | 0   | 0   | 0   | 0   | 0   |     | 0   | 0   |
| ERV | 0   | 0   | 0   | 0   | 0   | 0   | 0   | 0   | 0   | 0   |     | 0   | 0   |
| RIF | 0   | 0   | 0   | 0   | 0   | 0   | 0   | 0   | 1   | 0   | 0   |     | 0   |
| DAP | 0   | 0   | 0   | 0   | 0   | 0   | 0   | 0   | 1   | 0   | 0   | 0   |     |

|  |           |  |           |
|--|-----------|--|-----------|
|  | 1 study   |  | 6 studies |
|  | 2 studies |  | 7 studies |
|  | 3 studies |  | 8 studies |
|  | 4 studies |  | 9 studies |

### 3.16 Number of eligible isolates (only double combinations shown) tested by dynamic in vitro PK/PD models

|     | SAM | FEP | LVX | ETP | IMP | MEM | DOR | AMK | CST | PMB | TGC | RIF | DAP |
|-----|-----|-----|-----|-----|-----|-----|-----|-----|-----|-----|-----|-----|-----|
| SAM |     | 0   | 0   | 0   | 0   | 1   | 3   | 0   | 0   | 1   | 1   | 0   | 0   |
| FEP | 0   |     | 0   | 0   | 0   | 0   | 0   | 1   | 0   | 0   | 0   | 0   | 0   |
| LVX | 0   | 0   |     | 0   | 0   | 0   | 0   | 1   | 0   | 0   | 0   | 0   | 0   |
| ETP | 0   | 0   | 0   |     | 3   | 0   | 0   | 0   | 0   | 0   | 0   | 0   | 0   |
| IMP | 0   | 0   | 0   | 3   |     | 0   | 0   | 0   | 1   | 0   | 0   | 0   | 0   |
| MEM | 1   | 0   | 0   | 0   | 0   |     | 0   | 0   | 0   | 1   | 0   | 0   | 0   |
| DOR | 3   | 0   | 0   | 0   | 0   | 0   |     | 0   | 0   | 0   | 2   | 0   | 0   |
| AMK | 0   | 1   | 1   | 0   | 0   | 0   | 0   |     | 0   | 0   | 0   | 0   | 0   |
| CST | 0   | 0   | 0   | 0   | 1   | 0   | 0   | 0   |     |     | 0   | 1   | 1   |
| PMB | 1   | 0   | 0   | 0   | 0   | 1   | 0   | 0   |     |     | 0   | 0   | 0   |
| TGC | 1   | 0   | 0   | 0   | 0   | 0   | 2   | 0   | 0   | 0   |     | 0   | 0   |
| RIF | 0   | 0   | 0   | 0   | 0   | 0   | 0   | 0   | 1   | 0   | 0   |     | 0   |
| DAP | 0   | 0   | 0   | 0   | 0   | 0   | 0   | 0   | 1   | 0   | 0   | 0   |     |

|  |       |  |       |
|--|-------|--|-------|
|  | 1-5   |  | 21-30 |
|  | 6-10  |  | 31-40 |
|  | 11-15 |  | 41-50 |
|  | 16-20 |  | 51-60 |
|  |       |  | >60   |

### 3.17 Number of eligible studies (only double combinations shown) tested by animal models

|     | SUL | FEP | CIP | LVX | IMP | MEM | DOR | AMK | CST | RIF | VAN | DAP |
|-----|-----|-----|-----|-----|-----|-----|-----|-----|-----|-----|-----|-----|
| SUL |     | 0   | 0   | 0   | 1   | 0   | 0   | 0   | 0   | 2   | 0   | 0   |
| FEP | 0   |     | 0   | 1   | 0   | 0   | 0   | 1   | 0   | 0   | 0   | 0   |
| CIP | 0   | 0   |     | 0   | 0   | 0   | 1   | 0   | 0   | 0   | 0   | 0   |
| LVX | 0   | 1   | 0   |     | 0   | 0   | 1   | 1   | 1   | 0   | 0   | 0   |
| IMP | 1   | 0   | 0   | 0   |     | 1   | 0   | 1   | 0   | 4   | 0   | 0   |
| MEM | 0   | 0   | 0   | 0   | 1   |     | 0   | 0   | 0   | 0   | 0   | 0   |
| DOR | 0   | 0   | 1   | 1   | 0   | 0   |     | 0   | 1   | 0   | 1   | 0   |
| AMK | 0   | 1   | 0   | 1   | 1   | 0   | 0   |     | 0   | 1   | 0   | 0   |
| CST | 0   | 0   | 0   | 1   | 0   | 0   | 1   | 0   |     | 0   | 2   | 1   |
| RIF | 2   | 0   | 0   | 0   | 4   | 0   | 0   | 1   | 0   |     | 0   | 0   |
| VAN | 0   | 0   | 0   | 0   | 0   | 0   | 1   | 0   | 2   | 0   |     | 0   |
| DAP | 0   | 0   | 0   | 0   | 0   | 0   | 0   | 0   | 1   | 0   | 0   |     |

|  |           |  |           |
|--|-----------|--|-----------|
|  | 1 study   |  | 6 studies |
|  | 2 studies |  | 7 studies |
|  | 3 studies |  | 8 studies |
|  | 4 studies |  | 9 studies |

### 3.18 Number of eligible isolates (only double combinations shown) tested by animal models

|         | SU<br>L | FEP | CIP | LV<br>X | IM<br>P | ME<br>M | DO<br>R | AM<br>K | CST | RIF | VA<br>N | DA<br>P |
|---------|---------|-----|-----|---------|---------|---------|---------|---------|-----|-----|---------|---------|
| SU<br>L |         | 0   | 0   | 0       | 1       | 0       | 0       | 0       | 0   | 3   | 0       | 0       |
| FEP     | 0       |     | 0   | 1       | 0       | 0       | 0       | 1       | 0   | 0   | 0       | 0       |
| CIP     | 0       | 0   |     | 0       | 0       | 0       | 1       | 0       | 0   | 0   | 0       | 0       |
| LV<br>X | 0       | 1   | 0   |         | 0       | 0       | 1       | 1       | 1   | 0   | 0       | 0       |
| IM<br>P | 1       | 0   | 0   | 0       |         | 2       | 0       | 1       | 0   | 8   | 0       | 0       |
| ME<br>M | 0       | 0   | 0   | 0       | 2       |         | 0       | 0       | 0   | 0   | 0       | 0       |
| DO<br>R | 0       | 0   | 1   | 1       | 0       | 0       |         | 0       | 3   | 0   | 3       | 0       |
| AM<br>K | 0       | 1   | 0   | 1       | 1       | 0       | 0       |         | 0   | 1   | 0       | 0       |
| CST     | 0       | 0   | 0   | 1       | 0       | 0       | 3       | 0       |     | 0   | 4       | 1       |
| RIF     | 3       | 0   | 0   | 0       | 8       | 0       | 0       | 1       | 0   |     | 0       | 0       |
| VA<br>N | 0       | 0   | 0   | 0       | 0       | 0       | 3       | 0       | 4   | 0   |         | 0       |

|    |   |   |   |   |   |   |   |   |   |   |   |  |
|----|---|---|---|---|---|---|---|---|---|---|---|--|
| DA |   |   |   |   |   |   |   |   |   |   |   |  |
| P  | 0 | 0 | 0 | 0 | 0 | 0 | 0 | 0 | 1 | 0 | 0 |  |

|  |       |  |       |
|--|-------|--|-------|
|  | 1-5   |  | 21-30 |
|  | 6-10  |  | 31-40 |
|  | 11-15 |  | 41-50 |
|  | 16-20 |  | 51-60 |
|  |       |  | >60   |

## 4 Assessment of clinical relevance of observed synergy

### 4.1 Summary Table (sum of all studies): Proportion of synergy and clinically relevant synergy in checkerboard (CHBD) and time-kill assay (TKA)

| Antimicrobial combinations | CHBD      |            |               | CHBD: concentration at which synergy was present |                     |               | TKA       |            |               | TKA: concentration at which synergy was present |                     |               |
|----------------------------|-----------|------------|---------------|--------------------------------------------------|---------------------|---------------|-----------|------------|---------------|-------------------------------------------------|---------------------|---------------|
|                            | Studies N | Isolates n | Synergy n (%) | ≤ breakpoints n (%)                              | > breakpoints n (%) | Unclear n (%) | Studies N | Isolates n | Synergy n (%) | ≤ breakpoints n (%)                             | > breakpoints n (%) | Unclear n (%) |
| <b>AZM-based</b>           |           |            |               |                                                  |                     |               |           |            |               |                                                 |                     |               |
| AZM/CAZ                    | 1         | 3          | 1 (33%)       | 0 (0%)                                           | 1 (33%)             | 0 (0%)        |           |            |               |                                                 |                     |               |
| AZM/CIP                    | 1         | 3          | 0 (0%)        | 0 (0%)                                           | 0 (0%)              | 0 (0%)        |           |            |               |                                                 |                     |               |
| AZM/IMP                    | 1         | 2          | 0 (0%)        | 0 (0%)                                           | 0 (0%)              | 0 (0%)        |           |            |               |                                                 |                     |               |
| AZM/MEM                    | 1         | 12         | 0 (0%)        | 0 (0%)                                           | 0 (0%)              | 0 (0%)        |           |            |               |                                                 |                     |               |
| AZM/AMK                    | 1         | 2          | 0 (0%)        | 0 (0%)                                           | 0 (0%)              | 0 (0%)        |           |            |               |                                                 |                     |               |
| AZM/CST                    | 1         | 8          | 1 (13%)       | 0 (0%)                                           | 0 (0%)              | 1 (13%)       |           |            |               |                                                 |                     |               |
| <b>ATM-based</b>           |           |            |               |                                                  |                     |               |           |            |               |                                                 |                     |               |
| ATM/SAM                    |           |            |               |                                                  |                     |               | 1         | 1          | 0 (0%)        | 0 (0%)                                          | 0 (0%)              | 0 (0%)        |
| ATM/CAZ                    |           |            |               |                                                  |                     |               | 1         | 3          | 0 (0%)        | 0 (0%)                                          | 0 (0%)              | 0 (0%)        |
| ATM/FEP                    |           |            |               |                                                  |                     |               | 1         | 3          | 0 (0%)        | 0 (0%)                                          | 0 (0%)              | 0 (0%)        |
| ATM/MEM                    |           |            |               |                                                  |                     |               | 1         | 1          | 0 (0%)        | 0 (0%)                                          | 0 (0%)              | 0 (0%)        |
| ATM/CST                    | 1         | 9          | 4 (44%)       | 0 (0%)                                           | 0 (0%)              | 4 (44%)       |           |            |               |                                                 |                     |               |
| <b>SUL-based</b>           |           |            |               |                                                  |                     |               |           |            |               |                                                 |                     |               |
| SUL/CRO                    | 1         | 10         | 4 (40%)       | 0 (0%)                                           | 4 (40%)             | 0 (0%)        |           |            |               |                                                 |                     |               |
| SUL/CAZ                    | 1         | 10         | 7 (70%)       | 1 (10%)                                          | 6 (60%)             | 0 (0%)        |           |            |               |                                                 |                     |               |
| SUL/FEP                    | 1         | 9          | 4 (44%)       | 0 (0%)                                           | 4 (44%)             | 0 (0%)        |           |            |               |                                                 |                     |               |
| SUL/CIP                    | 1         | 10         | 8 (80%)       | 2 (20%)                                          | 6 (60%)             | 0 (0%)        |           |            |               |                                                 |                     |               |
| SUL/IMP                    | 2         | 10         | 0 (0%)        | 0 (0%)                                           | 0 (0%)              | 0 (0%)        | 3         | 6          | 3 (50%)       | 0 (0%)                                          | 3(50%)              | 0 (0%)        |

| Antimicrobial combinations | CHBD      |            |               | CHBD: concentration at which synergy was present |                     |               | TKA       |            |               | TKA: concentration at which synergy was present |                     |               |
|----------------------------|-----------|------------|---------------|--------------------------------------------------|---------------------|---------------|-----------|------------|---------------|-------------------------------------------------|---------------------|---------------|
|                            | Studies N | Isolates n | Synergy n (%) | ≤ breakpoints n (%)                              | > breakpoints n (%) | Unclear n (%) | Studies N | Isolates n | Synergy n (%) | ≤ breakpoints n (%)                             | > breakpoints n (%) | Unclear n (%) |
| SUL/MEM                    | 6         | 173        | 72 (42%)      | 2 (1%)                                           | 2 (1%)              | 68 (39%)      | 3         | 54         | 32 (59%)      | 0 (0%)                                          | 7 (13%)             | 25 (46%)      |
| SUL/DOR                    |           |            |               |                                                  |                     |               | 1         | 17         | 4 (24%)       | 4 (24%)                                         | 0 (0%)              | 0 (0%)        |
| SUL/AVI                    |           |            |               |                                                  |                     |               | 1         | 1          | 1 (100%)      | 1 (100%)                                        | 0 (0%)              | 0 (0%)        |
| SUL/GEN                    | 1         | 10         | 8 (80%)       | 2 (20%)                                          | 6 (60%)             | 0 (0%)        |           |            |               |                                                 |                     |               |
| SUL/CST                    |           |            |               |                                                  |                     |               | 1         | 6          | 2 (33%)       | 2 (33%)                                         | 0 (0%)              | 0 (0%)        |
| SUL/PMB                    | 1         | 3          | 2 (67%)       | 2 (67%)                                          | 0 (0%)              | 0 (0%)        |           |            |               |                                                 |                     |               |
| SUL/RIF                    | 1         | 50         | 10 (20%)      | 0 (0%)                                           | 0 (0%)              | 10 (20%)      | 2         | 6          | 3 (50%)       | 0 (0%)                                          | 3 (50%)             | 0 (0%)        |
| SUL/FOF                    | 2         | 56         | 41 (73%)      | 3 (5%)                                           | 37 (66%)            | 1 (2%)        | 2         | 10         | 7 (70%)       | 0 (0%)                                          | 7 (70%)             | 0 (0%)        |
| <b>SAM-based</b>           |           |            |               |                                                  |                     |               |           |            |               |                                                 |                     |               |
| SAM/ATM                    |           |            |               |                                                  |                     |               | 1         | 1          | 0 (0%)        | 0 (0%)                                          | 0 (0%)              | 0 (0%)        |
| SAM/FEP                    | 1         | 2          | 2 (100%)      | 1 (50%)                                          | 1 (50%)             | 0 (0%)        |           |            |               |                                                 |                     |               |
| SAM/LVX                    | 1         | 7          | 7 (100%)      | 5 (71%)                                          | 2 (29%)             | 0 (0%)        |           |            |               |                                                 |                     |               |
| SAM/IMP                    |           |            |               |                                                  |                     |               | 1         | 6          | 6 (100%)      | 0 (0%)                                          | 0 (0%)              | 6 (100%)      |
| SAM/MEM                    | 2         | 10         | 2 (100%)      | 2 (100%)                                         | 0 (0%)              | 0 (0%)        | 1         | 2          | 0 (0%)        | 0 (0%)                                          | 0 (0%)              | 0 (0%)        |
| SAM/DOR                    | 1         | 1          | 0 (0%)        | 0 (0%)                                           | 0 (0%)              | 0 (0%)        |           |            |               |                                                 |                     |               |
| SAM/CST                    | 2         | 10         | 0 (0%)        | 0 (0%)                                           | 0 (0%)              | 0 (0%)        |           |            |               |                                                 |                     |               |
| SAM/PMB                    |           |            |               |                                                  |                     |               | 1         | 2          | 0 (0%)        | 0 (0%)                                          | 0 (0%)              | 0 (0%)        |
| SAM/TGC                    | 2         | 13         | 0 (0%)        | 0 (0%)                                           | 0 (0%)              | 0 (0%)        |           |            |               |                                                 |                     |               |
| SAM/RIF                    | 1         | 7          | 7 (100%)      | 4 (57%)                                          | 1 (14%)             | 2 (29%)       |           |            |               |                                                 |                     |               |
| <b>CSF-based</b>           |           |            |               |                                                  |                     |               |           |            |               |                                                 |                     |               |
| CFS/MXF                    | 1         | 80         | 4 (5%)        | 0 (0%)                                           | 0 (0%)              | 4 (5%)        |           |            |               |                                                 |                     |               |
| CFS/IMP                    | 1         | 16         | 11 (69%)      | 9 (56%)                                          | 2 (13%)             | 0 (0%)        |           |            |               |                                                 |                     |               |
| CFS/MEM                    | 1         | 11         | 0 (0%)        | 0 (0%)                                           | 0 (0%)              | 0 (0%)        |           |            |               |                                                 |                     |               |
| CFS/CST                    | 1         | 3          | 0 (0%)        | 0 (0%)                                           | 0 (0%)              | 0 (0%)        |           |            |               |                                                 |                     |               |

| Antimicrobial combinations | CHBD      |            |               | CHBD: concentration at which synergy was present |                     |               | TKA       |            |               | TKA: concentration at which synergy was present |                     |               |
|----------------------------|-----------|------------|---------------|--------------------------------------------------|---------------------|---------------|-----------|------------|---------------|-------------------------------------------------|---------------------|---------------|
|                            | Studies N | Isolates n | Synergy n (%) | ≤ breakpoints n (%)                              | > breakpoints n (%) | Unclear n (%) | Studies N | Isolates n | Synergy n (%) | ≤ breakpoints n (%)                             | > breakpoints n (%) | Unclear n (%) |
| CFS/MIN                    | 1         | 2          | 0 (0%)        | 0 (0%)                                           | 0 (0%)              | 0 (0%)        | 1         | 2          | 1 (50%)       | 0 (0%)                                          | 1 (50%)             | 0 (0%)        |
| CFS/RIF                    | 1         | 7          | 2 (29%)       | 1 (14%)                                          | 0 (0%)              | 1 (14%)       |           |            |               |                                                 |                     |               |
| <b>TZB-based</b>           |           |            |               |                                                  |                     |               |           |            |               |                                                 |                     |               |
| TZB/MEM                    | 2         | 59         | 24 (41%)      | 0 (0%)                                           | 0 (0%)              | 24 (41%)      |           |            |               |                                                 |                     |               |
| <b>TZP-based</b>           |           |            |               |                                                  |                     |               |           |            |               |                                                 |                     |               |
| TZP/TGC                    | 1         | 18         | 0 (0%)        | 0 (0%)                                           | 0 (0%)              | 0 (0%)        |           |            |               |                                                 |                     |               |
| <b>CRO-based</b>           |           |            |               |                                                  |                     |               |           |            |               |                                                 |                     |               |
| CRO/SUL                    | 1         | 10         | 4 (40%)       | 0 (0%)                                           | 4 (40%)             | 0 (0%)        |           |            |               |                                                 |                     |               |
| <b>CAZ-based</b>           |           |            |               |                                                  |                     |               |           |            |               |                                                 |                     |               |
| CAZ/AZM                    | 1         | 3          | 1 (33%)       | 0 (0%)                                           | 1 (33%)             | 0 (0%)        |           |            |               |                                                 |                     |               |
| CAZ/ATM                    |           |            |               |                                                  |                     |               | 1         | 3          | 0 (0%)        | 0 (0%)                                          | 0 (0%)              | 0 (0%)        |
| CAZ/SUL                    | 1         | 10         | 7 (70%)       | 1 (10%)                                          | 6 (60%)             | 0 (0%)        |           |            |               |                                                 |                     |               |
| CAZ/CST                    | 1         | 9          | 4 (44%)       | 0 (0%)                                           | 0 (0%)              | 4 (44%)       |           |            |               |                                                 |                     |               |
| <b>FEP-based</b>           |           |            |               |                                                  |                     |               |           |            |               |                                                 |                     |               |
| FEP/ATM                    |           |            |               |                                                  |                     |               | 1         | 3          | 0 (0%)        | 0 (0%)                                          | 0 (0%)              | 0 (0%)        |
| FEP/SUL                    | 1         | 9          | 4 (44%)       | 0 (0%)                                           | 4 (44%)             | 0 (0%)        |           |            |               |                                                 |                     |               |
| FEP/SAM                    | 1         | 2          | 2 (100%)      | 1 (50%)                                          | 1 (50%)             | 0 (0%)        |           |            |               |                                                 |                     |               |
| FEP/LVX                    |           |            |               |                                                  |                     |               | 1         | 1          | 1 (100%)      | 0 (0%)                                          | 1 (100%)            | 0 (0%)        |
| FEP/MXF                    |           |            |               |                                                  |                     |               | 1         | 2          | 2 (100%)      | 0 (0%)                                          | 2 (100%)            | 0 (0%)        |
| FEP/AMK                    |           |            |               |                                                  |                     |               | 1         | 1          | 1 (100%)      | 0 (0%)                                          | 1 (100%)            | 0 (0%)        |
| <b>CIP-based</b>           |           |            |               |                                                  |                     |               |           |            |               |                                                 |                     |               |
| CIP/AZM                    | 1         | 3          | 0 (0%)        | 0 (0%)                                           | 0 (0%)              | 0 (0%)        |           |            |               |                                                 |                     |               |
| CIP/SUL                    | 1         | 10         | 8 (80%)       | 2 (20%)                                          | 6 (70%)             | 0 (0%)        |           |            |               |                                                 |                     |               |
| CIP/MEM                    | 2         | 45         | 4 (9%)        | 0 (0%)                                           | 1 (2%)              | 3 (7%)        |           |            |               |                                                 |                     |               |

| Antimicrobial combinations | CHBD      |            |               | CHBD: concentration at which synergy was present |                     |               | TKA       |            |               | TKA: concentration at which synergy was present |                     |               |
|----------------------------|-----------|------------|---------------|--------------------------------------------------|---------------------|---------------|-----------|------------|---------------|-------------------------------------------------|---------------------|---------------|
|                            | Studies N | Isolates n | Synergy n (%) | ≤ breakpoints n (%)                              | > breakpoints n (%) | Unclear n (%) | Studies N | Isolates n | Synergy n (%) | ≤ breakpoints n (%)                             | > breakpoints n (%) | Unclear n (%) |
| CIP/DOR                    |           |            |               |                                                  |                     |               | 1         | 1          | 0 (0%)        | 0 (0%)                                          | 0 (0%)              | 0 (0%)        |
| CIP/AMK                    | 1         | 34         | 4 (12%)       | 0 (0%)                                           | 0 (0%)              | 4 (12%)       |           |            |               |                                                 |                     |               |
| CIP/FOF                    | 1         | 2          | 1 (50%)       | 0 (0%)                                           | 1 (50%)             | 0 (0%)        | 1         | 1          | 0 (0%)        | 0 (0%)                                          | 0 (0%)              | 0 (0%)        |
| <b>LVX-based</b>           |           |            |               |                                                  |                     |               |           |            |               |                                                 |                     |               |
| LVX/SAM                    | 1         | 7          | 7 (100%)      | 5 (71%)                                          | 2 (29%)             | 0 (0%)        |           |            |               |                                                 |                     |               |
| LVX/FEP                    |           |            |               |                                                  |                     |               | 1         | 1          | 1 (100%)      | 0 (0%)                                          | 1 (100%)            | 0 (0%)        |
| LVX/DOR                    |           |            |               |                                                  |                     |               | 2         | 6          | 3 (50%)       | 0 (0%)                                          | 3 (50%)             | 0 (0%)        |
| LVX/CZA                    |           |            |               |                                                  |                     |               | 1         | 4          | 3 (75%)       | 0 (0%)                                          | 3 (75%)             | 0 (0%)        |
| LVX/AMK                    |           |            |               |                                                  |                     |               | 1         | 1          | 0 (0%)        | 0 (0%)                                          | 0 (0%)              | 0 (0%)        |
| LVX/CST                    | 2         | 2          | 1 (50%)       | 1 (50%)                                          | 0 (0%)              | 0 (0%)        | 2         | 2          | 1 (50%)       | 0 (0%)                                          | 1 (50%)             | 0 (0%)        |
| LVX/TGC                    | 2         | 25         | 4 (16%)       | 0 (0%)                                           | 4 (16%)             | 0 (0%)        | 1         | 2          | 0 (0%)        | 0 (0%)                                          | 0 (0%)              | 0 (0%)        |
| LVX/FOF                    | 1         | 1          | 0 (0%)        | 0 (0%)                                           | 0 (0%)              | 0 (0%)        |           |            |               |                                                 |                     |               |
| <b>MXF-based</b>           |           |            |               |                                                  |                     |               |           |            |               |                                                 |                     |               |
| MXF/CFS                    | 1         | 80         | 4 (5%)        | 0 (0%)                                           | 0 (0%)              | 4 (5%)        |           |            |               |                                                 |                     |               |
| MXF/FEP                    |           |            |               |                                                  |                     |               | 1         | 2          | 2 (100%)      | 0 (0%)                                          | 2 (100%)            | 0 (0%)        |
| <b>IMP-based</b>           |           |            |               |                                                  |                     |               |           |            |               |                                                 |                     |               |
| IMP/AZM                    | 1         | 2          | 0 (0%)        | 0 (0%)                                           | 0 (0%)              | 0 (0%)        |           |            |               |                                                 |                     |               |
| IMP/SUL                    | 2         | 10         | 0 (0%)        | 0 (0%)                                           | 0 (0%)              | 0 (0%)        | 3         | 6          | 3 (50%)       | 0 (0%)                                          | 3 (50%)             | 0 (0%)        |
| IMP/SAM                    |           |            |               |                                                  |                     |               | 1         | 6          | 6 (100%)      | 0 (0%)                                          | 0 (0%)              | 6 (100%)      |
| IMP/CFS                    | 1         | 16         | 11 (69%)      | 9 (56%)                                          | 2 (13%)             | 0 (0%)        |           |            |               |                                                 |                     |               |
| IMP/MEM                    | 1         | 21         | 6 (29%)       | 0 (0%)                                           | 6 (29%)             | 0 (0%)        |           |            |               |                                                 |                     |               |
| IMP/AMK                    | 2         | 4          | 3 (75%)       | 0 (0%)                                           | 2 (50%)             | 1 (25%)       |           |            |               |                                                 |                     |               |
| IMP/GEN                    |           |            |               |                                                  |                     |               | 1         | 2          | 0 (0%)        | 0 (0%)                                          | 0 (0%)              | 0 (0%)        |
| IMP/PLZ                    | 1         | 8          | 6 (75%)       | 0 (0%)                                           | 5 (63%)             | 1 (13%)       |           |            |               |                                                 |                     |               |

| Antimicrobial combinations | CHBD      |            |               | CHBD: concentration at which synergy was present |                     |               | TKA       |            |               | TKA: concentration at which synergy was present |                     |               |
|----------------------------|-----------|------------|---------------|--------------------------------------------------|---------------------|---------------|-----------|------------|---------------|-------------------------------------------------|---------------------|---------------|
|                            | Studies N | Isolates n | Synergy n (%) | ≤ breakpoints n (%)                              | > breakpoints n (%) | Unclear n (%) | Studies N | Isolates n | Synergy n (%) | ≤ breakpoints n (%)                             | > breakpoints n (%) | Unclear n (%) |
| IMP/CST                    | 2         | 10         | 9 (90%)       | 2 (20%)                                          | 7 (70%)             | 0 (0%)        | 1         | 2          | 0 (0%)        | 0 (0%)                                          | 0 (0%)              | 0 (0%)        |
| IMP/PMB                    |           |            |               |                                                  |                     |               | 1         | 1          | 1 (100%)      | 0 (0%)                                          | 1 (100%)            | 0 (0%)        |
| IMP/TGC                    | 1         | 12         | 1 (8%)        | 0 (0%)                                           | 1 (8%)              | 0 (0%)        | 1         | 1          | 0 (0%)        | 0 (0%)                                          | 0 (0%)              | 0 (0%)        |
| IMP/MIN                    |           |            |               |                                                  |                     |               | 1         | 1          | 0 (0%)        | 0 (0%)                                          | 0 (0%)              | 0 (0%)        |
| IMP/RIF                    | 2         | 28         | 16 (57%)      | 11 (39%)                                         | 3 (11%)             | 2 (7%)        | 5         | 13         | 6 (46%)       | 0 (0%)                                          | 6 (46%)             | 0 (0%)        |
| IMP/FOF                    | 3         | 45         | 26 (58%)      | 9 (20%)                                          | 10 (22%)            | 7 (16%)       | 1         | 9          | 8 (89%)       | 0 (0%)                                          | 8 (89%)             | 0 (0%)        |
| MEM-based                  |           |            |               |                                                  |                     |               |           |            |               |                                                 |                     |               |
| MEM/AZM                    | 1         | 12         | 0 (0%)        | 0 (0%)                                           | 0 (0%)              | 0 (0%)        |           |            |               |                                                 |                     |               |
| MEM/ATM                    |           |            |               |                                                  |                     |               | 1         | 1          | 0 (0%)        | 0 (0%)                                          | 0 (0%)              | 0 (0%)        |
| MEM/SUL                    | 6         | 173        | 72 (42%)      | 2 (1%)                                           | 2 (1%)              | 68 (39%)      | 3         | 54         | 32 (59%)      | 0 (0%)                                          | 7 (13%)             | 25 (46%)      |
| MEM/SAM                    | 2         | 10         | 2 (20%)       | 2 (20%)                                          | 0 (0%)              | 0 (0%)        | 1         | 2          | 0 (0%)        | 0 (0%)                                          | 0 (0%)              | 0 (0%)        |
| MEM/CFS                    | 1         | 11         | 0 (0%)        | 0 (0%)                                           | 0 (0%)              | 0 (0%)        |           |            |               |                                                 |                     |               |
| MEM/TZB                    | 2         | 59         | 24 (41%)      | 0 (0%)                                           | 0 (0%)              | 24 (41%)      |           |            |               |                                                 |                     |               |
| MEM/CIP                    | 2         | 45         | 4 (9%)        | 0 (0%)                                           | 1 (2%)              | 3 (7%)        |           |            |               |                                                 |                     |               |
| MEM/IMP                    | 1         | 21         | 6 (29%)       | 0 (0%)                                           | 6 (29%)             | 0 (0%)        |           |            |               |                                                 |                     |               |
| MEM/CZA                    |           |            |               |                                                  |                     |               | 2         | 15         | 3 (20%)       | 0 (0%)                                          | 3 (20%)             | 0 (0%)        |
| MEM/AMK                    | 4         | 47         | 16 (34%)      | 1 (2%)                                           | 2 (4%)              | 13 (28%)      |           |            |               |                                                 |                     |               |
| MEM/PLZ                    | 1         | 4          | 2 (50%)       | 0 (0%)                                           | 2 (50%)             | 0 (0%)        |           |            |               |                                                 |                     |               |
| MEM/CST                    | 6         | 29         | 21 (72%)      | 5 (17%)                                          | 11 (38%)            | 5 (17%)       | 3         | 4          | 4 (100%)      | 0 (0%)                                          | 4 (100%)            | 0 (0%)        |
| MEM/PMB                    | 1         | 3          | 3 (100%)      | 3 (100%)                                         | 0 (0%)              | 0 (0%)        | 1         | 2          | 0 (0%)        | 0 (0%)                                          | 0 (0%)              | 0 (0%)        |
| MEM/TGC                    |           |            |               |                                                  |                     |               | 1         | 1          | 0 (0%)        | 0 (0%)                                          | 0 (0%)              | 0 (0%)        |
| MEM/MIN                    | 1         | 3          | 0 (0%)        | 0 (0%)                                           | 0 (0%)              | 0 (0%)        | 1         | 3          | 0 (0%)        | 0 (0%)                                          | 0 (0%)              | 0 (0%)        |
| MEM/RIF                    | 1         | 50         | 10 (20%)      | 0 (0%)                                           | 0 (0%)              | 10 (20%)      | 1         | 2          | 2 (100%)      | 0 (0%)                                          | 2 (100%)            | 0 (0%)        |
| MEM/FOF                    | 4         | 79         | 15 (19%)      | 1 (1%)                                           | 14 (18%)            | 0 (0%)        |           |            |               |                                                 |                     |               |

| Antimicrobial combinations | CHBD      |            |               | CHBD: concentration at which synergy was present |                     |               | TKA       |            |               | TKA: concentration at which synergy was present |                     |               |
|----------------------------|-----------|------------|---------------|--------------------------------------------------|---------------------|---------------|-----------|------------|---------------|-------------------------------------------------|---------------------|---------------|
|                            | Studies N | Isolates n | Synergy n (%) | ≤ breakpoints n (%)                              | > breakpoints n (%) | Unclear n (%) | Studies N | Isolates n | Synergy n (%) | ≤ breakpoints n (%)                             | > breakpoints n (%) | Unclear n (%) |
| MEM/VAN                    | 1         | 5          | 3 (60%)       | 1 (20%)                                          | 0 (0%)              | 2 (40%)       |           |            |               |                                                 |                     |               |
| <b>DOR-based</b>           |           |            |               |                                                  |                     |               |           |            |               |                                                 |                     |               |
| DOR/SUL                    |           |            |               |                                                  |                     |               | 1         | 17         | 4 (24%)       | 4 (24%)                                         | 0 (0%)              | 0 (0%)        |
| DOR/SAM                    | 1         | 1          | 0 (0%)        | 0 (0%)                                           | 0 (0%)              | 0 (0%)        |           |            |               |                                                 |                     |               |
| DOR/CIP                    |           |            |               |                                                  |                     |               | 1         | 1          | 0 (0%)        | 0 (0%)                                          | 0 (0%)              | 0 (0%)        |
| DOR/LVX                    |           |            |               |                                                  |                     |               | 2         | 6          | 3 (50%)       | 0 (0%)                                          | 3 (50%)             | 0 (0%)        |
| DOR/AMK                    | 1         | 4          | 1 (25%)       | 0 (0%)                                           | 0 (0%)              | 1 (25%)       | 1         | 2          | 2 (100%)      | 0 (0%)                                          | 2 (100%)            | 0 (0%)        |
| DOR/CST                    | 3         | 6          | 2 (33%)       | 1 (17%)                                          | 1 (17%)             | 0 (0%)        | 5         | 33         | 23 (70%)      | 19 (58%)                                        | 4 (12%)             | 0 (0%)        |
| DOR/TGC                    | 1         | 3          | 3 (100%)      | 1 (33%)                                          | 0 (0%)              | 2 (67%)       | 1         | 45         | 5 (11%)       | 5 (11%)                                         | 0 (0%)              | 0 (0%)        |
| DOR/RIF                    | 1         | 1          | 0 (0%)        | 0 (0%)                                           | 0 (0%)              | 0 (0%)        | 1         | 5          | 2 (40%)       | 1 (20%)                                         | 1 (20%)             | 0 (0%)        |
| DOR/FOF                    | 1         | 3          | 3             | 3 (100%)                                         | 3                   | 3 (100%)      | 1         | 1          | 0 (0%)        | 0 (0%)                                          | 0 (0%)              | 0 (0%)        |
| DOR/VAN                    | 1         | 3          | 0 (0%)        | 0 (0%)                                           | 0 (0%)              | 0 (0%)        | 1         | 3          | 0 (0%)        | 0 (0%)                                          | 0 (0%)              | 0 (0%)        |
| <b>CZA- or AVI-based</b>   |           |            |               |                                                  |                     |               |           |            |               |                                                 |                     |               |
| AVI/SUL                    |           |            |               |                                                  |                     |               | 1         | 1          | 1 (100%)      | 1 (100%)                                        | 0 (0%)              | 0 (0%)        |
| CZA/LVX                    |           |            |               |                                                  |                     |               | 1         | 4          | 3 (75%)       | 0 (0%)                                          | 3 (75%)             | 0 (0%)        |
| CZA/MEM                    |           |            |               |                                                  |                     |               | 2         | 15         | 3 (20%)       | 0 (0%)                                          | 3 (20%)             | 0 (0%)        |
| CZA/TOB                    |           |            |               |                                                  |                     |               | 1         | 2          | 1 (50%)       | 0 (0%)                                          | 1 (50%)             | 0 (0%)        |
| CZA/CST                    |           |            |               |                                                  |                     |               | 1         | 2          | 2 (100%)      | 0 (0%)                                          | 2 (100%)            | 0 (0%)        |
| CZA/TGC                    |           |            |               |                                                  |                     |               | 1         | 4          | 3 (75%)       | 0 (0%)                                          | 3 (75%)             | 0 (0%)        |
| <b>AMK-based</b>           |           |            |               |                                                  |                     |               |           |            |               |                                                 |                     |               |
| AMK/AZM                    | 1         | 2          | 0 (0%)        | 0 (0%)                                           | 0 (0%)              | 0 (0%)        |           |            |               |                                                 |                     |               |
| AMK/FEP                    |           |            |               |                                                  |                     |               | 1         | 1          | 1 (100%)      | 0 (0%)                                          | 1 (100%)            | 0 (0%)        |
| AMK/CIP                    | 1         | 34         | 4 (12%)       | 0 (0%)                                           | 0 (0%)              | 4 (12%)       |           |            |               |                                                 |                     |               |
| AMK/LVX                    |           |            |               |                                                  |                     |               | 1         | 1          | 0 (0%)        | 0 (0%)                                          | 0 (0%)              | 0 (0%)        |

| Antimicrobial combinations | CHBD      |            |               | CHBD: concentration at which synergy was present |                     |               | TKA       |            |               | TKA: concentration at which synergy was present |                     |               |
|----------------------------|-----------|------------|---------------|--------------------------------------------------|---------------------|---------------|-----------|------------|---------------|-------------------------------------------------|---------------------|---------------|
|                            | Studies N | Isolates n | Synergy n (%) | ≤ breakpoints n (%)                              | > breakpoints n (%) | Unclear n (%) | Studies N | Isolates n | Synergy n (%) | ≤ breakpoints n (%)                             | > breakpoints n (%) | Unclear n (%) |
| AMK/IMP                    | 2         | 4          | 3 (75%)       | 0 (0%)                                           | 2 (50%)             | 1 (25%)       |           |            |               |                                                 |                     |               |
| AMK/MEM                    | 4         | 47         | 16 (34%)      | 1 (2%)                                           | 2 (4%)              | 13 (28%)      |           |            |               |                                                 |                     |               |
| AMK/DOR                    | 1         | 4          | 1 (25%)       | 0 (0%)                                           | 0 (0%)              | 1 (25%)       | 1         | 2          | 2 (100%)      | 0 (0%)                                          | 2 (100%)            | 0 (0%)        |
| AMK/CST                    | 1         | 6          | 2 (33%)       | 0 (0%)                                           | 0 (0%)              | 2 (33%)       |           |            |               |                                                 |                     |               |
| AMK/TGC                    | 1         | 14         | 2 (14%)       | 1 (7%)                                           | 1 (7%)              | 0             | 1         | 1          | 1 (100%)      | 1 (100%)                                        | 0 (0%)              | 0 (0%)        |
| AMK/FOF                    | 2         | 29         | 26 (90%)      | 11 (38%)                                         | 15 (52%)            | 0 (0%)        |           |            |               |                                                 |                     |               |
| GEN-based                  |           |            |               |                                                  |                     |               |           |            |               |                                                 |                     |               |
| GEN/SUL                    | 1         | 10         | 8 (80%)       | 2 (20%)                                          | 6 (60%)             | 0 (0%)        |           |            |               |                                                 |                     |               |
| GEN/IMP                    |           |            |               |                                                  |                     |               | 1         | 2          | 0 (0%)        | 0 (0%)                                          | 0 (0%)              | 0 (0%)        |
| GEN/CST                    | 1         | 1          | 0 (0%)        | 0 (0%)                                           | 0 (0%)              | 0 (0%)        |           |            |               |                                                 |                     |               |
| GEN/FOF                    | 2         | 13         | 12 (92%)      | 3 (23%)                                          | 9 (69%)             | 0 (0%)        |           |            |               |                                                 |                     |               |
| TOB-based                  |           |            |               |                                                  |                     |               |           |            |               |                                                 |                     |               |
| TOB/CZA                    |           |            |               |                                                  |                     |               | 1         | 2          | 1 (50%)       | 0 (0%)                                          | 1 (50%)             | 0 (0%)        |
| TOB/FOF                    | 1         | 2          | 1 (50%)       | 0 (0%)                                           | 1 (50%)             | 0 (0%)        |           |            |               |                                                 |                     |               |
| PLZ-based                  |           |            |               |                                                  |                     |               |           |            |               |                                                 |                     |               |
| PLZ/IMP                    | 1         | 8          | 6 (75%)       | 0 (0%)                                           | 5 (63%)             | 1 (13%)       |           |            |               |                                                 |                     |               |
| PLZ/MEM                    | 1         | 4          | 2 (50%)       | 0 (0%)                                           | 2 (50%)             | 0 (0%)        |           |            |               |                                                 |                     |               |
| PLZ/FOF                    | 1         | 9          | 1 (11%)       | 0 (0%)                                           | 1 (11%)             | 0 (0%)        | 1         | 2          | 0 (0%)        | 0 (0%)                                          | 0 (0%)              | 0 (0%)        |
| CST-based                  |           |            |               |                                                  |                     |               |           |            |               |                                                 |                     |               |
| CST/AZM                    | 1         | 8          | 1 (13%)       | 0 (0%)                                           | 0 (0%)              | 1(13%)        |           |            |               |                                                 |                     |               |
| CST/ATM                    | 1         | 9          | 4 (44%)       | 0 (0%)                                           | 0 (0%)              | 4 (44%)       |           |            |               |                                                 |                     |               |
| CST/SUL                    |           |            |               |                                                  |                     |               | 1         | 6          | 2 (33%)       | 2 (33%)                                         | 0 (0%)              | 0 (0%)        |
| CST/SAM                    | 2         | 10         | 0 (0%)        | 0 (0%)                                           | 0 (0%)              | 0 (0%)        |           |            |               |                                                 |                     |               |
| CST/CFS                    | 1         | 3          | 0 (0%)        | 0 (0%)                                           | 0 (0%)              | 0 (0%)        |           |            |               |                                                 |                     |               |

| Antimicrobial combinations | CHBD      |            |               | CHBD: concentration at which synergy was present |                     |               | TKA       |            |               | TKA: concentration at which synergy was present |                     |               |
|----------------------------|-----------|------------|---------------|--------------------------------------------------|---------------------|---------------|-----------|------------|---------------|-------------------------------------------------|---------------------|---------------|
|                            | Studies N | Isolates n | Synergy n (%) | ≤ breakpoints n (%)                              | > breakpoints n (%) | Unclear n (%) | Studies N | Isolates n | Synergy n (%) | ≤ breakpoints n (%)                             | > breakpoints n (%) | Unclear n (%) |
| CST/CAZ                    | 1         | 9          | 4 (44%)       | 0 (0%)                                           | 0 (0%)              | 4 (44%)       |           |            |               |                                                 |                     |               |
| CST/LVX                    | 2         | 2          | 1 (50%)       | 1 (50%)                                          | 0 (0%)              | 0 (0%)        | 2         | 2          | 1 (50%)       | 0 (0%)                                          | 1 (50%)             | 0 (0%)        |
| CST/IMP                    | 2         | 10         | 9 (90%)       | 2 (20%)                                          | 7 (70%)             | 0 (0%)        | 1         | 2          | 0 (0%)        | 0 (0%)                                          | 0 (0%)              | 0 (0%)        |
| CST/MEM                    | 6         | 29         | 21 (72%)      | 5 (17%)                                          | 11 (38%)            | 5 (17%)       | 3         | 4          | 4 (100%)      | 0 (0%)                                          | 4 (100%)            | 0 (0%)        |
| CST/DOR                    | 3         | 6          | 2 (33%)       | 1 (17%)                                          | 1 (17%)             | 0 (0%)        | 5         | 33         | 23 (70%)      | 19 (58%)                                        | 4 (12%)             | 0 (0%)        |
| CST/CZA                    |           |            |               |                                                  |                     |               | 1         | 2          | 2 (100%)      | 0 (0%)                                          | 2 (100%)            | 0 (0%)        |
| CST/AMK                    | 1         | 6          | 2 (33%)       | 0 (0%)                                           | 0 (0%)              | 2 (33%)       |           |            |               |                                                 |                     |               |
| CST/GEN                    | 1         | 1          | 0 (0%)        | 0 (0%)                                           | 0 (0%)              | 0 (0%)        |           |            |               |                                                 |                     |               |
| CST/TGC                    | 2         | 10         | 0 (0%)        | 0 (0%)                                           | 0 (0%)              | 0 (0%)        | 1         | 12         | 7 (58%)       | 7 (58%)                                         | 0 (0%)              | 0 (0%)        |
| CST/ERV                    | 1         | 3          | 1 (33%)       | 0 (0%)                                           | 1 (33%)             | 0 (0%)        |           |            |               |                                                 |                     |               |
| CST/RIF                    | 5         | 40         | 31 (78%)      | 10 (25%)                                         | 10 (25%)            | 11 (28%)      | 3         | 7          | 7 (100%)      | 0 (0%)                                          | 6 (86%)             | 1 (14%)       |
| CST/RFB                    | 1         | 3          | 3 (100%)      | 0 (0%)                                           | 0 (0%)              | 3 (100%)      |           |            |               |                                                 |                     |               |
| CST/FOF                    | 2         | 9          | 0 (0%)        | 0 (0%)                                           | 0 (0%)              | 0 (0%)        |           |            |               |                                                 |                     |               |
| CST/TMP                    | 1         | 1          | 1 (100%)      | 0 (0%)                                           | 1 (100%)            | 0 (0%)        | 1         | 1          | 1 (100%)      | 0 (0%)                                          | 1 (100%)            | 0 (0%)        |
| CST/SXT                    | 2         | 8          | 2 (25%)       | 1 (13%)                                          | 0 (0%)              | 1 (13%)       | 1         | 1          | 1 (100%)      | 0 (0%)                                          | 1 (100%)            | 0 (0%)        |
| CST/CHL                    | 1         | 2          | 2 (100%)      | 1 (50%)                                          | 1 (50%)             | 0 (0%)        | 1         | 2          | 2 (100%)      | 0 (0%)                                          | 2 (100%)            | 0 (0%)        |
| CST/FA                     | 2         | 6          | 6 (100%)      | 1 (17%)                                          | 2 (33%)             | 3 (50%)       | 2         | 4          | 3 (75%)       | 0 (0%)                                          | 3 (75%)             | 0 (0%)        |
| CST/VAN                    | 7         | 33         | 29 (88%)      | 2 (6%)                                           | 2 (6%)              | 25 (76%)      | 6         | 20         | 16 (80%)      | 13 (65%)                                        | 3 (15%)             | 0 (0%)        |
| CST/TEC                    | 1         | 9          | 4 (44%)       | 0 (0%)                                           | 0 (0%)              | 4 (44%)       |           |            |               |                                                 |                     |               |
| CST/DAP                    |           |            |               |                                                  |                     |               | 2         | 5          | 0 (0%)        | 0 (0%)                                          | 0 (0%)              | 0 (0%)        |
| <b>PMB-based</b>           |           |            |               |                                                  |                     |               |           |            |               |                                                 |                     |               |
| PMB/SUL                    | 1         | 3          | 2 (67%)       | 2 (67%)                                          | 0 (0%)              | 0 (0%)        |           |            |               |                                                 |                     |               |
| PMB/SAM                    |           |            |               |                                                  |                     |               | 1         | 2          | 0 (0%)        | 0 (0%)                                          | 0 (0%)              | 0 (0%)        |
| PMB/IMP                    |           |            |               |                                                  |                     |               | 1         | 1          | 1 (100%)      | 0 (0%)                                          | 1 (100%)            | 0 (0%)        |

| Antimicrobial combinations | CHBD      |            |               | CHBD: concentration at which synergy was present |                     |               | TKA       |            |               | TKA: concentration at which synergy was present |                     |               |
|----------------------------|-----------|------------|---------------|--------------------------------------------------|---------------------|---------------|-----------|------------|---------------|-------------------------------------------------|---------------------|---------------|
|                            | Studies N | Isolates n | Synergy n (%) | ≤ breakpoints n (%)                              | > breakpoints n (%) | Unclear n (%) | Studies N | Isolates n | Synergy n (%) | ≤ breakpoints n (%)                             | > breakpoints n (%) | Unclear n (%) |
| PMB/MEM                    | 1         | 3          | 3 (100%)      | 3 (100%)                                         | 0 (0%)              | 0 (0%)        | 1         | 2          | 0 (0%)        | 0 (0%)                                          | 0 (0%)              | 0 (0%)        |
| PMB/TGC                    | 1         | 4          | 3 (75%)       | 0 (0%)                                           | 2 (50%)             | 1 (25%)       | 1         | 4          | 0 (0%)        | 0 (0%)                                          | 0 (0%)              | 0 (0%)        |
| PMB/RIF                    | 1         | 3          | 3 (100%)      | 1 (33%)                                          | 1 (33%)             | 1 (33%)       | 1         | 3          | 1 (33%)       | 1 (33%)                                         | 0 (0%)              | 0 (0%)        |
| PMB/FOF                    | 1         | 3          | 0 (0%)        | 0 (0%)                                           | 0 (0%)              | 0 (0%)        |           |            |               |                                                 |                     |               |
| PMB/VAN                    | 1         | 3          | 3 (100%)      | 3 (100%)                                         | 0 (0%)              | 0 (0%)        | 1         | 3          | 2 (67%)       | 0 (0%)                                          | 2 (67%)             | 0 (0%)        |
| TGC-based                  |           |            |               |                                                  |                     |               |           |            |               |                                                 |                     |               |
| TGC/SAM                    | 2         | 13         | 0 (0%)        | 0 (0%)                                           | 0 (0%)              | 0 (0%)        |           |            |               |                                                 |                     |               |
| TGC/TZP                    | 1         | 18         | 0 (0%)        | 0 (0%)                                           | 0 (0%)              | 0 (0%)        |           |            |               |                                                 |                     |               |
| TGC/LVX                    | 2         | 25         | 4 (16%)       | 0 (0%)                                           | 4 (16%)             | 0 (0%)        | 1         | 2          | 0 (0%)        | 0 (0%)                                          | 0 (0%)              | 0 (0%)        |
| TGC/IMP                    | 1         | 12         | 1 (8%)        | 0 (0%)                                           | 1 (8%)              | 0 (0%)        | 1         | 1          | 0 (0%)        | 0 (0%)                                          | 0 (0%)              | 0 (0%)        |
| TGC/MEM                    |           |            |               |                                                  |                     |               | 1         | 1          | 0 (0%)        | 0 (0%)                                          | 0 (0%)              | 0 (0%)        |
| TGC/DOR                    | 1         | 3          | 3 (100%)      | 1 (33%)                                          | 0 (0%)              | 2 (67%)       | 1         | 45         | 5 (11%)       | 5 (11%)                                         | 0 (0%)              | 0 (0%)        |
| TGC/CZA                    |           |            |               |                                                  |                     |               | 1         | 4          | 3 (75%)       | 0 (0%)                                          | 3 (75%)             | 0 (0%)        |
| TGC/AMK                    | 1         | 14         | 2 (14%)       | 1 (7%)                                           | 1 (7%)              | 0 (0%)        | 1         | 1          | 1 (100%)      | 1 (100%)                                        | 0 (0%)              | 0 (0%)        |
| TGC/CST                    | 2         | 10         | 0 (0%)        | 0 (0%)                                           | 0 (0%)              | 0 (0%)        | 1         | 12         | 7 (58%)       | 7 (58%)                                         | 0 (0%)              | 0 (0%)        |
| TGC/PMB                    | 1         | 4          | 3 (75%)       | 0 (0%)                                           | 2 (50%)             | 1 (25%)       | 1         | 4          | 0 (0%)        | 0 (0%)                                          | 0 (0%)              | 0 (0%)        |
| TGC/RIF                    | 2         | 16         | 1 (6%)        | 0 (0%)                                           | 1 (6%)              | 0 (0%)        | 2         | 4          | 1 (25%)       | 1 (25%)                                         | 0 (0%)              | 0 (0%)        |
| TGC/FOF                    | 1         | 4          | 3 (75%)       | 1 (25%)                                          | 2 (50%)             | 0 (0%)        | 1         | 1          | 1 (100%)      | 0 (0%)                                          | 1 (100%)            | 0 (0%)        |
| MIN-based                  |           |            |               |                                                  |                     |               |           |            |               |                                                 |                     |               |
| MIN/CFS                    | 1         | 2          | 0 (0%)        | 0 (0%)                                           | 0 (0%)              | 0 (0%)        | 1         | 2          | 1 (50%)       | 0 (0%)                                          | 1 (50%)             | 0 (0%)        |
| MIN/IMP                    |           |            |               |                                                  |                     |               | 1         | 1          | 0 (0%)        | 0 (0%)                                          | 0 (0%)              | 0 (0%)        |
| MIN/MEM                    | 1         | 3          | 0 (0%)        | 0 (0%)                                           | 0 (0%)              | 0 (0%)        | 1         | 3          | 0 (0%)        | 0 (0%)                                          | 0 (0%)              | 0 (0%)        |
| ERV-based                  |           |            |               |                                                  |                     |               |           |            |               |                                                 |                     |               |
| ERV/CST                    | 1         | 3          | 1 (33%)       | 0 (0%)                                           | 1 (33%)             | 0 (0%)        |           |            |               |                                                 |                     |               |

| Antimicrobial combinations | CHBD      |            |               | CHBD: concentration at which synergy was present |                     |               | TKA       |            |               | TKA: concentration at which synergy was present |                     |               |
|----------------------------|-----------|------------|---------------|--------------------------------------------------|---------------------|---------------|-----------|------------|---------------|-------------------------------------------------|---------------------|---------------|
|                            | Studies N | Isolates n | Synergy n (%) | ≤ breakpoints n (%)                              | > breakpoints n (%) | Unclear n (%) | Studies N | Isolates n | Synergy n (%) | ≤ breakpoints n (%)                             | > breakpoints n (%) | Unclear n (%) |
| <b>RIF-based</b>           |           |            |               |                                                  |                     |               |           |            |               |                                                 |                     |               |
| RIF/SUL                    | 1         | 50         | 10 (20%)      | 0 (0%)                                           | 0 (0%)              | 10 (20%)      | 2         | 6          | 3 (50%)       | 0 (0%)                                          | 3 (50%)             | 0 (0%)        |
| RIF/SAM                    | 1         | 7          | 7 (100%)      | 4 (57%)                                          | 1 (14%)             | 2 (29%)       |           |            |               |                                                 |                     |               |
| RIF/CFS                    | 1         | 7          | 2 (29%)       | 1 (14%)                                          | 0 (0%)              | 1 (14%)       |           |            |               |                                                 |                     |               |
| RIF/IMP                    | 2         | 28         | 16 (57%)      | 11 (39%)                                         | 3 (11%)             | 2 (7%)        | 5         | 13         | 6 (46%)       | 0 (0%)                                          | 6 (46%)             | 0 (0%)        |
| RIF/MEM                    | 1         | 50         | 10 (20%)      | 0 (0%)                                           | 0 (0%)              | 10 (20%)      | 1         | 2          | 2 (100%)      | 0 (0%)                                          | 2 (100%)            | 0 (0%)        |
| RIF/DOR                    | 1         | 1          | 0 (0%)        | 0 (0%)                                           | 0 (0%)              | 0 (0%)        | 1         | 5          | 2 (40%)       | 0 (0%)                                          | 1 (20%)             | 0 (0%)        |
| RIF/CST                    | 5         | 40         | 31 (78%)      | 10 (25%)                                         | 10 (25%)            | 11 (28%)      | 3         | 7          | 7 (100%)      | 0 (0%)                                          | 6 (86%)             | 1 (14%)       |
| RIF/PMB                    | 1         | 3          | 3 (100%)      | 1 (33%)                                          | 1 (33%)             | 1 (33%)       | 1         | 3          | 1 (33%)       | 1 (33%)                                         | 0 (0%)              | 0 (0%)        |
| RIF/TGC                    | 2         | 16         | 1 (6%)        | 0 (0%)                                           | 1 (6%)              | 0 (0%)        | 2         | 4          | 1 (25%)       | 1 (25%)                                         | 0 (0%)              | 0 (0%)        |
| RIF/FOF                    | 1         | 50         | 12 (24%)      | 0 (0%)                                           | 0 (0%)              | 12 (24%)      |           |            |               |                                                 |                     |               |
| RIF/LZD                    | 1         | 3          | 0 (0%)        | 0 (0%)                                           | 0 (0%)              | 0 (0%)        |           |            |               |                                                 |                     |               |
| <b>RFB-based</b>           |           |            |               |                                                  |                     |               |           |            |               |                                                 |                     |               |
| RFB/CST                    | 1         | 3          | 3 (100%)      | 0 (0%)                                           | 0 (0%)              | 3 (100%)      |           |            |               |                                                 |                     |               |
| <b>FOF-based</b>           |           |            |               |                                                  |                     |               |           |            |               |                                                 |                     |               |
| FOF/SUL                    | 2         | 56         | 41 (73%)      | 3 (5%)                                           | 37 (66%)            | 1 (2%)        | 2         | 10         | 7 (70%)       | 0 (0%)                                          | 7 (70%)             | 0 (0%)        |
| FOF/CIP                    | 1         | 2          | 1 (50%)       | 0 (0%)                                           | 1 (50%)             | 0 (0%)        | 1         | 1          | 0 (0%)        | 0 (0%)                                          | 0 (0%)              | 0 (0%)        |
| FOF/LVX                    | 1         | 1          | 0 (0%)        | 0 (0%)                                           | 0 (0%)              | 0 (0%)        |           |            |               |                                                 |                     |               |
| FOF/IMP                    | 3         | 45         | 26 (58%)      | 9 (20%)                                          | 10 (22%)            | 7 (16%)       | 1         | 9          | 8 (89%)       | 0 (0%)                                          | 8 (89%)             | 0 (0%)        |
| FOF/MEM                    | 4         | 79         | 15 (19%)      | 1 (1%)                                           | 14 (18%)            | 0 (0%)        |           |            |               |                                                 |                     |               |
| FOF/DOR                    | 1         | 3          | 3 (100%)      | 0 (0%)                                           | 3 (100%)            | 0 (0%)        | 1         | 1          | 0 (0%)        | 0 (0%)                                          | 0 (0%)              | 0 (0%)        |
| FOF/AMK                    | 2         | 29         | 26 (90%)      | 11 (38%)                                         | 15 (52%)            | 0 (0%)        |           |            |               |                                                 |                     |               |
| FOF/GEN                    | 2         | 13         | 12 (92%)      | 3 (23%)                                          | 9 (69%)             | 0 (0%)        |           |            |               |                                                 |                     |               |
| FOF/TOB                    | 1         | 2          | 1 (50%)       | 0 (0%)                                           | 1 (50%)             | 0 (0%)        |           |            |               |                                                 |                     |               |

[illegible]

| Antimicrobial combinations | CHBD      |            |               | CHBD: concentration at which synergy was present |                     |               | TKA       |            |               | TKA: concentration at which synergy was present |                     |               |
|----------------------------|-----------|------------|---------------|--------------------------------------------------|---------------------|---------------|-----------|------------|---------------|-------------------------------------------------|---------------------|---------------|
|                            | Studies N | Isolates n | Synergy n (%) | ≤ breakpoints n (%)                              | > breakpoints n (%) | Unclear n (%) | Studies N | Isolates n | Synergy n (%) | ≤ breakpoints n (%)                             | > breakpoints n (%) | Unclear n (%) |
| LZD/RIF                    | 1         | 3          | 0 (0%)        | 0 (0%)                                           | 0 (0%)              | 0 (0%)        |           |            |               |                                                 |                     |               |
| <b>Triple combinations</b> |           |            |               |                                                  |                     |               |           |            |               |                                                 |                     |               |
| PMB/FOF/MEM                | 1         | 3          | 3 (100%)      | 3 (100%)                                         | 0 (0%)              | 0 (0%)        |           |            |               |                                                 |                     |               |
| PMB/SUL/MEM                | 1         | 3          | 3 (100%)      | 3 (100%)                                         | 0 (0%)              | 0 (0%)        |           |            |               |                                                 |                     |               |
| PMB/SAM/MEM                |           |            |               |                                                  |                     |               | 2         | 2          | 1 (50%)       | 0 (0%)                                          | 1 (50%)             | 0 (0%)        |
| CST/DOR/SUL                |           |            |               |                                                  |                     |               | 1         | 6          | 6 (100%)      | 6 (100%)                                        | 0 (0%)              | 0 (0%)        |
| CST/VAN/DOR                |           |            |               |                                                  |                     |               | 1         | 3          | 3 (100%)      | 3 (100%)                                        | 0 (0%)              | 0 (0%)        |
| IMP/SUL/AMK                |           |            |               |                                                  |                     |               | 1         | 8          | 0 (0%)        | 0 (0%)                                          | 0 (0%)              | 0 (0%)        |
| IMP/TIM/AMK                |           |            |               |                                                  |                     |               | 1         | 8          | 0 (0%)        | 0 (0%)                                          | 0 (0%)              | 0 (0%)        |
| TZP/SUL/AMK                |           |            |               |                                                  |                     |               | 1         | 8          | 0 (0%)        | 0 (0%)                                          | 0 (0%)              | 0 (0%)        |
| TZP/TIM/AMK                |           |            |               |                                                  |                     |               | 1         | 8          | 0 (0%)        | 0 (0%)                                          | 0 (0%)              | 0 (0%)        |
| <b>Sum</b>                 | 139       | 1402       | 539 (39%)     | 112 (8%)                                         | 194 (14%)           | 233 (17%)     | 99        | 407        | 185 (46%)     | 65 (16%)                                        | 88 (22%)            | 32 (8%)       |

%= 100\*n/N

MCBT assay was used in only 1 study and is not shown in the Table. See Section 4.5 (Bae S, 2016 [32])

Highlighted in green= combinations shown to be synergistic at concentrations equal to or lower than established breakpoints of resistance.

## 4.2 Summary Table (sum of all studies): Proportion of synergy and clinically relevant synergy in gradient- and disk-based methods

| Antimicrobial combinations | Gradient methods* |            |               | Gradient methods*: concentration at which synergy was present |                     |               | Disk methods* |            |               | Disk methods*: concentration at which synergy was present |                     |               |
|----------------------------|-------------------|------------|---------------|---------------------------------------------------------------|---------------------|---------------|---------------|------------|---------------|-----------------------------------------------------------|---------------------|---------------|
|                            | Studies N         | Isolates n | Synergy n (%) | ≤ breakpoints n (%)                                           | > breakpoints n (%) | Unclear n (%) | Studies N     | Isolates n | Synergy n (%) | ≤ breakpoints n (%)                                       | > breakpoints n (%) | Unclear n (%) |
| <b>SUL-based</b>           |                   |            |               |                                                               |                     |               |               |            |               |                                                           |                     |               |
| SUL/MEM                    | 2                 | 61         | 23 (38%)      | 0 (0%)                                                        | 0 (0%)              | 23 (38%)      |               |            |               |                                                           |                     |               |
| <b>SAM-based</b>           |                   |            |               |                                                               |                     |               |               |            |               |                                                           |                     |               |
| SAM/RIF                    | 1                 | 7          | 0 (0%)        | 0 (0%)                                                        | 0 (0%)              | 0 (0%)        |               |            |               |                                                           |                     |               |
| <b>CSF-based</b>           |                   |            |               |                                                               |                     |               |               |            |               |                                                           |                     |               |
| CFS/MXF                    | 1                 | 80         | 2 (3%)        | 0 (0%)                                                        | 0 (0%)              | 2 (3%)        |               |            |               |                                                           |                     |               |
| CFS/IMP                    | 1                 | 19         | 9 (47%)       | 0 (0%)                                                        | 0 (0%)              | 9 (47%)       |               |            |               |                                                           |                     |               |
| CFS/MEM                    | 1                 | 19         | 10 (53%)      | 0 (0%)                                                        | 0 (0%)              | 10 (53%)      |               |            |               |                                                           |                     |               |
| CFS/DOR                    | 1                 | 19         | 4 (21%)       | 0 (0%)                                                        | 0 (0%)              | 4 (21%)       |               |            |               |                                                           |                     |               |
| CFS/RIF                    | 1                 | 7          | 0 (0%)        | 0 (0%)                                                        | 0 (0%)              | 0 (0%)        |               |            |               |                                                           |                     |               |
| <b>TZB-based</b>           |                   |            |               |                                                               |                     |               |               |            |               |                                                           |                     |               |
| TZB/MEM                    | 1                 | 54         | 19 (35%)      | 0 (0%)                                                        | 0 (0%)              | 19 (35%)      |               |            |               |                                                           |                     |               |
| <b>MXF-based</b>           |                   |            |               |                                                               |                     |               |               |            |               |                                                           |                     |               |
| MXF/CFS                    | 1                 | 80         | 2 (3%)        | 0 (0%)                                                        | 0 (0%)              | 2 (3%)        |               |            |               |                                                           |                     |               |
| MXF/IMP                    | 1                 | 21         | 1 (5%)        | 0 (0%)                                                        | 0 (0%)              | 1 (5%)        |               |            |               |                                                           |                     |               |
| MXF/MEM                    | 1                 | 21         | 0 (0%)        | 0 (0%)                                                        | 0 (0%)              | 0 (0%)        |               |            |               |                                                           |                     |               |
| MXF/DOR                    | 1                 | 21         | 0 (0%)        | 0 (0%)                                                        | 0 (0%)              | 0 (0%)        |               |            |               |                                                           |                     |               |
| <b>IMP-based</b>           |                   |            |               |                                                               |                     |               |               |            |               |                                                           |                     |               |
| IMP/CFS                    | 1                 | 19         | 9 (47%)       | 0 (0%)                                                        | 0 (0%)              | 9 (47%)       |               |            |               |                                                           |                     |               |
| IMP/MXF                    | 1                 | 21         | 1 (5%)        | 0 (0%)                                                        | 0 (0%)              | 1 (5%)        |               |            |               |                                                           |                     |               |

| Antimicrobial combinations | Gradient methods* |               |                  | Gradient methods*: concentration at which synergy was present |                        |                  | Disk methods* |               |                  | Disk methods*: concentration at which synergy was present |                        |                  |
|----------------------------|-------------------|---------------|------------------|---------------------------------------------------------------|------------------------|------------------|---------------|---------------|------------------|-----------------------------------------------------------|------------------------|------------------|
|                            | Studies<br>N      | Isolates<br>n | Synergy<br>n (%) | ≤ breakpoints<br>n (%)                                        | > breakpoints<br>n (%) | Unclear<br>n (%) | Studies<br>N  | Isolates<br>n | Synergy<br>n (%) | ≤ breakpoints<br>n (%)                                    | > breakpoints<br>n (%) | Unclear<br>n (%) |
| IMP/NET                    | 1                 | 21            | 0 (0%)           | 0 (0%)                                                        | 0 (0%)                 | 0 (0%)           |               |               |                  |                                                           |                        |                  |
| IMP/CST                    | 1                 | 41            | 19 (46%)         | 0 (0%)                                                        | 0 (0%)                 | 19 (46%)         |               |               |                  |                                                           |                        |                  |
| IMP/DOX                    | 1                 | 21            | 0 (0%)           | 0 (0%)                                                        | 0 (0%)                 | 0 (0%)           |               |               |                  |                                                           |                        |                  |
| IMP/RIF                    | 1                 | 17            | 0 (0%)           | 0 (0%)                                                        | 0 (0%)                 | 0 (0%)           | 1             | 1             | 1 (100%)         | 0 (0%)                                                    | 1(100%)                | 0 (0%)           |
| <b>MEM-based</b>           |                   |               |                  |                                                               |                        |                  |               |               |                  |                                                           |                        |                  |
| MEM/SUL                    | 2                 | 61            | 23 (38%)         | 0 (0%)                                                        | 0 (0%)                 | 23 (38%)         |               |               |                  |                                                           |                        |                  |
| MEM/CFS                    | 1                 | 19            | 10 (53%)         | 0 (0%)                                                        | 0 (0%)                 | 10 (53%)         |               |               |                  |                                                           |                        |                  |
| MEM/TZB                    | 1                 | 54            | 19 (35%)         | 0 (0%)                                                        | 0 (0%)                 | 19 (35%)         |               |               |                  |                                                           |                        |                  |
| MEM/MXF                    | 1                 | 21            | 0 (0%)           | 0 (0%)                                                        | 0 (0%)                 | 0 (0%)           |               |               |                  |                                                           |                        |                  |
| MEM/CZA                    |                   |               |                  |                                                               |                        |                  | 1             | 11            | 2 (18%)          | 0 (0%)                                                    | 0 (0%)                 | 2 (18%)          |
| MEM/NET                    | 1                 | 21            | 0 (0%)           | 0 (0%)                                                        | 0 (0%)                 | 0 (0%)           |               |               |                  |                                                           |                        |                  |
| MEM/CST                    | 1                 | 41            | 35 (85%)         | 2 (5%)                                                        | 0 (0%)                 | 33 (81%)         |               |               |                  |                                                           |                        |                  |
| MEM/DOX                    | 1                 | 21            | 0 (0%)           | 0 (0%)                                                        | 0 (0%)                 | 0 (0%)           |               |               |                  |                                                           |                        |                  |
| MEM/RIF                    | 1                 | 17            | 0 (0%)           | 0 (0%)                                                        | 0 (0%)                 | 0 (0%)           |               |               |                  |                                                           |                        |                  |
| <b>DOR-based</b>           |                   |               |                  |                                                               |                        |                  |               |               |                  |                                                           |                        |                  |
| DOR/CFS                    | 1                 | 19            | 4 (21%)          | 0 (0%)                                                        | 0 (0%)                 | 4 (21%)          |               |               |                  |                                                           |                        |                  |
| DOR/MXF                    | 1                 | 21            | 0 (0%)           | 0 (0%)                                                        | 0 (0%)                 | 0 (0%)           |               |               |                  |                                                           |                        |                  |
| DOR/NET                    | 1                 | 21            | 0 (0%)           | 0 (0%)                                                        | 0 (0%)                 | 0 (0%)           |               |               |                  |                                                           |                        |                  |
| DOR/DOX                    | 1                 | 21            | 0 (0%)           | 0 (0%)                                                        | 0 (0%)                 | 0 (0%)           |               |               |                  |                                                           |                        |                  |
| DOR/RIF                    | 1                 | 17            | 0 (0%)           | 0 (0%)                                                        | 0 (0%)                 | 0 (0%)           |               |               |                  |                                                           |                        |                  |
| <b>CZA- or AVI-based</b>   |                   |               |                  |                                                               |                        |                  |               |               |                  |                                                           |                        |                  |
| CZA/MEM                    |                   |               |                  |                                                               |                        |                  | 1             | 11            | 2 (18%)          | 0 (0%)                                                    | 0 (0%)                 | 2 (18%)          |
| <b>NET-based</b>           |                   |               |                  |                                                               |                        |                  |               |               |                  |                                                           |                        |                  |
| NET/IMP                    | 1                 | 21            | 0 (0%)           | 0 (0%)                                                        | 0 (0%)                 | 0 (0%)           |               |               |                  |                                                           |                        |                  |

| Antimicrobial combinations | Gradient methods* |               |                  | Gradient methods*: concentration at which synergy was present |                        |                  | Disk methods* |               |                  | Disk methods*: concentration at which synergy was present |                        |                  |
|----------------------------|-------------------|---------------|------------------|---------------------------------------------------------------|------------------------|------------------|---------------|---------------|------------------|-----------------------------------------------------------|------------------------|------------------|
|                            | Studies<br>N      | Isolates<br>n | Synergy<br>n (%) | ≤ breakpoints<br>n (%)                                        | > breakpoints<br>n (%) | Unclear<br>n (%) | Studies<br>N  | Isolates<br>n | Synergy<br>n (%) | ≤ breakpoints<br>n (%)                                    | > breakpoints<br>n (%) | Unclear<br>n (%) |
| NET/MEM                    | 1                 | 21            | 0 (0%)           | 0 (0%)                                                        | 0 (0%)                 | 0 (0%)           |               |               |                  |                                                           |                        |                  |
| NET/DOR                    | 1                 | 21            | 0 (0%)           | 0 (0%)                                                        | 0 (0%)                 | 0 (0%)           |               |               |                  |                                                           |                        |                  |
| <b>CST-based</b>           |                   |               |                  |                                                               |                        |                  |               |               |                  |                                                           |                        |                  |
| CST/IMP                    | 1                 | 41            | 19 (46%)         | 0 (0%)                                                        | 0 (0%)                 | 19 (46%)         |               |               |                  |                                                           |                        |                  |
| CST/MEM                    | 1                 | 41            | 35 (85%)         | 2 (5%)                                                        | 0 (0%)                 | 33 (81%)         |               |               |                  |                                                           |                        |                  |
| CST/RIF                    | 2                 | 45            | 37 (82%)         | 0 (0%)                                                        | 0 (0%)                 | 37 (82%)         |               |               |                  |                                                           |                        |                  |
| CST/FA                     |                   |               |                  |                                                               |                        |                  | 1             | 3             | 3 (100%)         | 0 (0%)                                                    | 3 (100%)               | 0 (0%)           |
| CST/DAP                    | 1                 | 4             | 0 (0%)           | 0 (0%)                                                        | 0 (0%)                 | 0 (0%)           |               |               |                  |                                                           |                        |                  |
| <b>PMB-based</b>           |                   |               |                  |                                                               |                        |                  |               |               |                  |                                                           |                        |                  |
| PMB/TGC                    | 1                 | 4             | 0 (0%)           | 0 (0%)                                                        | 0 (0%)                 | 0 (0%)           |               |               |                  |                                                           |                        |                  |
| PMB/RIF                    | 1                 | 3             | 1 (33%)          | 0 (0%)                                                        | 0 (0%)                 | 1 (33%)          |               |               |                  |                                                           |                        |                  |
| PMB/VAN                    | 1                 | 3             | 3 (100%)         | 3 (100%)                                                      | 0 (0%)                 | 0 (0%)           | 1             | 3             | 3 (100%)         | 3 (100%)                                                  | 0 (0%)                 | 0 (0%)           |
| <b>DOX-based</b>           |                   |               |                  |                                                               |                        |                  |               |               |                  |                                                           |                        |                  |
| DOX/IMP                    | 1                 | 21            | 0 (0%)           | 0 (0%)                                                        | 0 (0%)                 | 0 (0%)           |               |               |                  |                                                           |                        |                  |
| DOX/MEM                    | 1                 | 21            | 0 (0%)           | 0 (0%)                                                        | 0 (0%)                 | 0 (0%)           |               |               |                  |                                                           |                        |                  |
| DOX/DOR                    | 1                 | 21            | 0 (0%)           | 0 (0%)                                                        | 0 (0%)                 | 0 (0%)           |               |               |                  |                                                           |                        |                  |
| <b>TGC-based</b>           |                   |               |                  |                                                               |                        |                  |               |               |                  |                                                           |                        |                  |
| TGC/PMB                    | 1                 | 4             | 0 (0%)           | 0 (0%)                                                        | 0 (0%)                 | 0 (0%)           |               |               |                  |                                                           |                        |                  |
| TGC/RIF                    | 1                 | 3             | 1 (33%)          | 0 (0%)                                                        | 0 (0%)                 | 1 (33%)          |               |               |                  |                                                           |                        |                  |
| <b>RIF-based</b>           |                   |               |                  |                                                               |                        |                  |               |               |                  |                                                           |                        |                  |
| RIF/SAM                    | 1                 | 7             | 0 (0%)           | 0 (0%)                                                        | 0 (0%)                 | 0 (0%)           |               |               |                  |                                                           |                        |                  |
| RIF/CFS                    | 1                 | 7             | 0 (0%)           | 0 (0%)                                                        | 0 (0%)                 | 0 (0%)           |               |               |                  |                                                           |                        |                  |
| RIF/IMP                    | 1                 | 17            | 0 (0%)           | 0 (0%)                                                        | 0 (0%)                 | 0 (0%)           | 1             | 1             | 1 (100%)         | 0 (0%)                                                    | 1 (100%)               | 0 (0%)           |
| RIF/MEM                    | 1                 | 17            | 0 (0%)           | 0 (0%)                                                        | 0 (0%)                 | 0 (0%)           |               |               |                  |                                                           |                        |                  |
| RIF/DOR                    | 1                 | 17            | 0 (0%)           | 0 (0%)                                                        | 0 (0%)                 | 0 (0%)           |               |               |                  |                                                           |                        |                  |

| Antimicrobial combinations | Gradient methods* |            |               | Gradient methods*: concentration at which synergy was present |                     |               | Disk methods* |            |               | Disk methods*: concentration at which synergy was present |                     |               |
|----------------------------|-------------------|------------|---------------|---------------------------------------------------------------|---------------------|---------------|---------------|------------|---------------|-----------------------------------------------------------|---------------------|---------------|
|                            | Studies N         | Isolates n | Synergy n (%) | ≤ breakpoints n (%)                                           | > breakpoints n (%) | Unclear n (%) | Studies N     | Isolates n | Synergy n (%) | ≤ breakpoints n (%)                                       | > breakpoints n (%) | Unclear n (%) |
| RIF/CST                    | 2                 | 45         | 37 (82%)      | 0 (0%)                                                        | 0 (0%)              | 37 (82%)      |               |            |               |                                                           |                     |               |
| RIF/PMB                    | 1                 | 3          | 1 (33%)       | 0 (0%)                                                        | 0 (0%)              | 1 (33%)       |               |            |               |                                                           |                     |               |
| RIF/TGC                    | 1                 | 3          | 1 (33%)       | 0 (0%)                                                        | 0 (0%)              | 1 (33%)       |               |            |               |                                                           |                     |               |
| <b>FA-based</b>            |                   |            |               |                                                               |                     |               |               |            |               |                                                           |                     |               |
| FA/CST                     |                   |            |               |                                                               |                     |               | 1             | 3          | 3 (100%)      | 0 (0%)                                                    | 3 (100%)            | 0 (0%)        |
| <b>VAN-based</b>           |                   |            |               |                                                               |                     |               |               |            |               |                                                           |                     |               |
| VAN/PMB                    | 1                 | 3          | 3 (100%)      | 3 (100%)                                                      | 0 (0%)              | 0 (0%)        | 1             | 3          | 3 (100%)      | 3 (100%)                                                  | 0 (0%)              | 0 (0%)        |
| <b>DAP-based</b>           |                   |            |               |                                                               |                     |               |               |            |               |                                                           |                     |               |
| DAP/CST                    | 1                 | 4          | 0 (0%)        | 0 (0%)                                                        | 0 (0%)              | 0 (0%)        |               |            |               |                                                           |                     |               |
| <b>Sum</b>                 | 30                | 650        | 164 (25%)     | 5 (1%)                                                        | 0 (0%)              | 159 (24%)     | 4             | 18         | 9 (50%)       | 3 (17%)                                                   | 4 (22%)             | 2 (11%)       |

%= 100\*n/N

\* Including gradient/agar and disk/agar methods

Highlighted in green= combinations shown to be synergistic at concentrations equal to or lower than established breakpoints of resistance.

### 4.3 Summary Table (sum of all studies): Proportion of synergy and clinically relevant synergy in agar dilution and dynamic in vitro PK/PD models

| Antimicrobial combinations | Agar dilution |               |                  | Agar dilution: concentration at which synergy was present |                        |                  | Dynamic in vitro PK/PD studies |               |                  |
|----------------------------|---------------|---------------|------------------|-----------------------------------------------------------|------------------------|------------------|--------------------------------|---------------|------------------|
|                            | Studies<br>N  | Isolates<br>n | Synergy<br>n (%) | ≤ breakpoints<br>n (%)                                    | > breakpoints<br>n (%) | Unclear<br>n (%) | Studies<br>N                   | Isolates<br>n | Synergy<br>n (%) |
| <b>SUL-based</b>           |               |               |                  |                                                           |                        |                  |                                |               |                  |
| SUL/IMP                    | 1             | 4             | 4 (100%)         | 4 (100%)                                                  | 0 (0%)                 | 0 (0%)           |                                |               |                  |
| SUL/MEM                    | 1             | 4             | 4 (100%)         | 4 (100%)                                                  | 0 (0%)                 | 0 (0%)           |                                |               |                  |
| SUL/AVI                    | 1             | 38            | 35 (92%)         | 35 (92%)                                                  | 0 (0%)                 | 0 (0%)           |                                |               |                  |
| <b>SAM-based</b>           |               |               |                  |                                                           |                        |                  |                                |               |                  |
| SAM/MEM                    |               |               |                  |                                                           |                        |                  | 1                              | 1             | 0 (0%)           |
| SAM/DOR                    |               |               |                  |                                                           |                        |                  | 1                              | 3             | 0 (0%)           |
| SAM/PMB                    |               |               |                  |                                                           |                        |                  | 1                              | 1             | 0 (0%)           |
| SAM/TGC                    |               |               |                  |                                                           |                        |                  | 1                              | 1             | 0 (0%)           |
| <b>FEP-based</b>           |               |               |                  |                                                           |                        |                  |                                |               |                  |
| FEP/AMK                    |               |               |                  |                                                           |                        |                  | 1                              | 1             | 0 (0%)           |
| <b>LVX-based</b>           |               |               |                  |                                                           |                        |                  |                                |               |                  |
| LVX/AMK                    |               |               |                  |                                                           |                        |                  | 1                              | 1             | 0 (0%)           |
| <b>ETP-based</b>           |               |               |                  |                                                           |                        |                  |                                |               |                  |
| ETP/IMP                    |               |               |                  |                                                           |                        |                  | 1                              | 3             | 0 (0%)           |
| <b>IMP-based</b>           |               |               |                  |                                                           |                        |                  |                                |               |                  |
| IMP/SUL                    | 1             | 4             | 4 (100%)         | 4 (100%)                                                  | 0 (0%)                 | 0 (0%)           |                                |               |                  |
| IMP/ETP                    |               |               |                  |                                                           |                        |                  | 1                              | 3             | 0 (0%)           |
| IMP/CST                    |               |               |                  |                                                           |                        |                  | 1                              | 1             | 0 (0%)           |
| <b>MEM-based</b>           |               |               |                  |                                                           |                        |                  |                                |               |                  |
| MEM/SUL                    | 1             | 4             | 4 (100%)         | 4 (100%)                                                  | 0 (0%)                 | 0 (0%)           |                                |               |                  |

| Antimicrobial combinations | Agar dilution |            |               | Agar dilution: concentration at which synergy was present |                     |               | Dynamic in vitro PK/PD studies |            |               |
|----------------------------|---------------|------------|---------------|-----------------------------------------------------------|---------------------|---------------|--------------------------------|------------|---------------|
|                            | Studies N     | Isolates n | Synergy n (%) | ≤ breakpoints n (%)                                       | > breakpoints n (%) | Unclear n (%) | Studies N                      | Isolates n | Synergy n (%) |
| MEM/SAM                    |               |            |               |                                                           |                     |               | 1                              | 1          | 0 (0%)        |
| MEM/PMB                    |               |            |               |                                                           |                     |               | 1                              | 1          | 0 (0%)        |
| <b>DOR-based</b>           |               |            |               |                                                           |                     |               |                                |            |               |
| DOR/SAM                    |               |            |               |                                                           |                     |               | 1                              | 3          | 0 (0%)        |
| DOR/TGC                    |               |            |               |                                                           |                     |               | 1                              | 2          | 0 (0%)        |
| <b>CZA- or AVI-based</b>   |               |            |               |                                                           |                     |               |                                |            |               |
| AVI/SUL                    | 1             | 38         | 35 (92%)      | 35 (92%)                                                  | 0 (0%)              | 0 (0%)        |                                |            |               |
| <b>AMK-based</b>           |               |            |               |                                                           |                     |               |                                |            |               |
| AMK/FEP                    |               |            |               |                                                           |                     |               | 1                              | 1          | 0 (0%)        |
| AMK/LVX                    |               |            |               |                                                           |                     |               | 1                              | 1          | 0 (0%)        |
| <b>CST-based</b>           |               |            |               |                                                           |                     |               |                                |            |               |
| CST/IMP                    |               |            |               |                                                           |                     |               | 1                              | 1          | 0 (0%)        |
| CST/RIF                    |               |            |               |                                                           |                     |               | 1                              | 1          | 1 (100%)      |
| CST/DAP                    |               |            |               |                                                           |                     |               | 1                              | 1          | 0 (0%)        |
| <b>PMB-based</b>           |               |            |               |                                                           |                     |               |                                |            |               |
| PMB/SAM                    |               |            |               |                                                           |                     |               | 1                              | 1          | 0 (0%)        |
| PMB/MEM                    |               |            |               |                                                           |                     |               | 1                              | 1          | 0 (0%)        |
| <b>TGC-based</b>           |               |            |               |                                                           |                     |               |                                |            |               |
| TGC/SAM                    |               |            |               |                                                           |                     |               | 1                              | 1          | 0 (0%)        |
| TGC/DOR                    |               |            |               |                                                           |                     |               | 1                              | 2          | 0 (0%)        |
| <b>RIF-based</b>           |               |            |               |                                                           |                     |               |                                |            |               |
| RIF/CST                    |               |            |               |                                                           |                     |               | 1                              | 1          | 1 (100%)      |
| <b>DAP-based</b>           |               |            |               |                                                           |                     |               |                                |            |               |
| DAP/CST                    |               |            |               |                                                           |                     |               | 1                              | 1          | 0 (0%)        |

| Antimicrobial combinations | Agar dilution |               |                  | Agar dilution: concentration at which synergy was present |                        |                  | Dynamic in vitro PK/PD studies |               |                  |
|----------------------------|---------------|---------------|------------------|-----------------------------------------------------------|------------------------|------------------|--------------------------------|---------------|------------------|
|                            | Studies<br>N  | Isolates<br>n | Synergy<br>n (%) | ≤ breakpoints<br>n (%)                                    | > breakpoints<br>n (%) | Unclear<br>n (%) | Studies<br>N                   | Isolates<br>n | Synergy<br>n (%) |
| Triple combinations        |               |               |                  |                                                           |                        |                  |                                |               |                  |
| PMB/SAM/MEM                |               |               |                  |                                                           |                        |                  | 1                              | 1             | 1 (100%)         |
| Sum                        | 3             | 46            | 43 (94%)         | 43 (94%)                                                  | 0 (0%)                 | 0 (0%)           | 13                             | 18            | 2 (11%)          |

%= 100\*n/N

Highlighted in green= combinations shown to be synergistic at concentrations equal to or lower than established breakpoints of resistance, or active in dynamic in vitro PK/PD models.

#### 4.4 Proportion of synergy and assessment of clinical relevance of observed synergy in checkerboard assays (study level data)

| Study-combinations                                     | Synergy % (n/N) | Synergy at concentrations ≤ breakpoints % (n/N) | Synergy at concentrations > breakpoints % (n/N) | Synergy but unclear if at concentration ≤ breakpoints % (n/N) | Notes                                                                                                                                                                                                                                                                                                                      |
|--------------------------------------------------------|-----------------|-------------------------------------------------|-------------------------------------------------|---------------------------------------------------------------|----------------------------------------------------------------------------------------------------------------------------------------------------------------------------------------------------------------------------------------------------------------------------------------------------------------------------|
| Cebrero-Cangueiro T, 2021 [1] and Nordmann P, 2020 [2] |                 |                                                 |                                                 |                                                               |                                                                                                                                                                                                                                                                                                                            |
| MEM/IMP                                                | 29 (6/21)       | 0 (0/21)                                        | 29 (6/21)                                       | 0 (0/21)                                                      | Checkerboard: Based on reported FICIs synergy was present at the following MEM/IMP concentrations: 32/16, 16/8, 16/8, 32/32, 16/8, 16/4 mg/L<br>Animal model: Similar mortality and bacterial clearance comparing meropenem monotherapy to combination therapy. Decreased bacterial loads with combination vs monotherapy. |
| Cheng J 2021 [3]                                       |                 |                                                 |                                                 |                                                               |                                                                                                                                                                                                                                                                                                                            |
| CST/RFB                                                | 100 (3/3)       | 0 (0/3)                                         | 0 (0/3)                                         | 100 (3/3)                                                     | Concentrations at which synergy was observed are not reported                                                                                                                                                                                                                                                              |
| CST/RIF                                                | 100 (2/2)       | 0 (0/2)                                         | 0 (0/2)                                         | 100 (2/2)                                                     |                                                                                                                                                                                                                                                                                                                            |
| Nwabor OF 2021 [4]                                     |                 |                                                 |                                                 |                                                               |                                                                                                                                                                                                                                                                                                                            |
| FOF/IMP                                                | 0 (0/2)         | NA                                              | NA                                              | NA                                                            | No synergy                                                                                                                                                                                                                                                                                                                 |
| FOF/MEM                                                | 0 (0/1)         | NA                                              | NA                                              | NA                                                            | No synergy                                                                                                                                                                                                                                                                                                                 |
| FOF/DOR                                                | 100 (3/3)       | 0 (0/3)                                         | 100 (3/3)                                       | 0 (0/3)                                                       | Synergy at: 128/2, 128/4 and 512/4 mg/L.                                                                                                                                                                                                                                                                                   |
| FOF/TOB                                                | 50 (1/2)        | 0 (0/2)                                         | 50 (1/2)                                        | 0 (0/2)                                                       | Synergy at 128/2 mg/L.                                                                                                                                                                                                                                                                                                     |
| FOF/GEN                                                | 100 (2/2)       | 0 (0/2)                                         | 100 (2/2)                                       | 0 (0/2)                                                       | Synergy at 128/8 and 128/64 mg/L.                                                                                                                                                                                                                                                                                          |
| FOF/CIP                                                | 50 (1/2)        | 0 (0/2)                                         | 50 (1/2)                                        | 0 (0/2)                                                       | Synergy at 128/2 or 64/8 mg/L (2 possible MIC combinations based on the reported FICI).                                                                                                                                                                                                                                    |

| Study-combinations                                        | Synergy % (n/N) | Synergy at concentrations ≤ breakpoints % (n/N) | Synergy at concentrations > breakpoints % (n/N) | Synergy but unclear if at concentration ≤ breakpoints % (n/N) | Notes                                                                                                                                                                                                   |
|-----------------------------------------------------------|-----------------|-------------------------------------------------|-------------------------------------------------|---------------------------------------------------------------|---------------------------------------------------------------------------------------------------------------------------------------------------------------------------------------------------------|
| FOF/LVX                                                   | 0 (0/1)         | NA                                              | NA                                              | NA                                                            | No synergy                                                                                                                                                                                              |
| FOF/TGC                                                   | 75 (3/4)        | 25 (1/3)                                        | 50 (2/3)                                        | 0 (0/3)                                                       | Synergy at 128/0.5, 32/1 and 128/0.5 mg/L).                                                                                                                                                             |
| <b>Armengol E, 2020 [5]</b>                               |                 |                                                 |                                                 |                                                               |                                                                                                                                                                                                         |
| RIF/LZD                                                   | 0 (0/3)         | NA                                              | NA                                              | NA                                                            | No synergy                                                                                                                                                                                              |
| <b>Li J, 2020 [6]</b>                                     |                 |                                                 |                                                 |                                                               |                                                                                                                                                                                                         |
| CST/MEM                                                   | 80 (4/5)        | 40 (2/5)                                        | 20 (1/5)                                        | 20 (1/5)                                                      | Based on reported MICs and FICIs synergy at: AB075: 1/8 or 0.5/16 mg/L, AB084: 0.58 mg/L, AB118: 1/2 or 0.5/4 mg/L, AB133: 1/36 mg/L.                                                                   |
| CST/LVX                                                   | 100 (1/1)       | 100 (1/1)                                       | 0 (0/1)                                         | 0 (0/1)                                                       | Based on reported MICs and FICIs synergy at: AB075: 1/2 or 0.5/4 mg/L.                                                                                                                                  |
| <b>Limsrivanichakorn S, 2020 [7]</b>                      |                 |                                                 |                                                 |                                                               |                                                                                                                                                                                                         |
| CFS/MXF                                                   | 5 (4/80)        | 0 (0/80)                                        | 0 (0/80)                                        | 5 (4/80)                                                      | Unclear at which concentration synergy was present                                                                                                                                                      |
| <b>Mohd Sazlly Lim S 2020 [8], 2021 [9], 2021 [10,85]</b> |                 |                                                 |                                                 |                                                               |                                                                                                                                                                                                         |
| SUL/FOF                                                   | 74 (37/50)      | 2 (1/50)                                        | 72 (36/50)                                      | 0 (0/50)                                                      | Synergy at: 0.5/256 (n=1), 4/128 (n=1), 8/32 (n=3), 8/64 (n=1), 8/128 (n=3), 16/32 (n=7), 16/64 (n=6), 16/128 (n=1), 32/8 (n=3), 32/32 (n=2), 32/64 (n=6), 32/128 (n=1), 64/8 (n=1), 64/64 (n= 1) mg/L. |
| SUL/MEM                                                   | 56 (28/50)      | 0 (0/50)                                        | 56 (28/50)                                      | 0 (0/50)                                                      | Synergy at: 4/16 (n=1), 16/8 (n=2), 16/16 (n=1), 32/1 (n=1), 32/4 (n=1), 32/8 (n=2), 32/16 (n=4), 32/32 (n=5), 32/128 (n=1), 64/1 (n=2), 64/4 (n=1), 64/8 (n=2), 64/16                                  |

| Study-combinations                      | Synergy % (n/N) | Synergy at concentrations ≤ breakpoints % (n/N) | Synergy at concentrations > breakpoints % (n/N) | Synergy but unclear if at concentration ≤ breakpoints % (n/N) | Notes                                                                                                                                                                                  |
|-----------------------------------------|-----------------|-------------------------------------------------|-------------------------------------------------|---------------------------------------------------------------|----------------------------------------------------------------------------------------------------------------------------------------------------------------------------------------|
| FOF/MEM                                 | 28 (14/50)      | 0 (0/50)                                        | 28 (14/50)                                      | 0 (0/50)                                                      | (n=2), 64/32 (n=2), 64/128 (n=1).<br>Synergy at: 8/128 (n=2), 32/16 (n=2), 64/4 (n=1), 64/8 (n=1), 128/1 (n=1), 128/8 (n=2), 128/16 (n=1), 256/4 (n=1), 256/8 (n=2), 512/1 (n=1) mg/L. |
| FOF/RIF                                 | 24 (12/50)      | 0 (0/50)                                        | 0 (0/50)                                        | 24 (12/50)                                                    | Data not available. Combination MIC50 and MIC90 64/2 and 256/8 mg/L                                                                                                                    |
| MEM/RIF                                 | 20 (10/50)      | 0 (0/50)                                        | 0 (0/50)                                        | 20 (10/50)                                                    | Data not available. Combination MIC50 and MIC90 32/2 and 64/4mg/L                                                                                                                      |
| RIF/SUL                                 | 20 (10/50)      | 0 (0/50)                                        | 0 (0/50)                                        | 20 (10/50)                                                    | Data not available. Combination MIC50 and MIC90 2/32 and 4/64 mg/L                                                                                                                     |
| <b>Ghaith D, 2019 [13]</b>              |                 |                                                 |                                                 |                                                               |                                                                                                                                                                                        |
| CST/RIF                                 | 61 (14/23)      | 22 (5/23)                                       | 39 (9/23)                                       | 0 (0/23)                                                      | Synergy at the following concentrations: 4/2, 16/1, 1/0.5, 0.5/0.5, 16/1, 0.5/0.5, 0.5/0.5, 2/16, 8/2, 2/0.5, 0.5/16, 0.5/16, 0.5/8, and 4/2 mg/L                                      |
| <b>Mengucci TC 2019 [15], 2016 [16]</b> |                 |                                                 |                                                 |                                                               |                                                                                                                                                                                        |
| PMB/MEM                                 | 100 (3/3)       | 100 (3/3)                                       | 0 (0/3)                                         | 0 (0/3)                                                       | Synergy at; 0.5/0.5, 0.5/0.5 and 0.5/4 mg/L                                                                                                                                            |
| PMB/SUL                                 | 67 (2/3)        | 67 (2/3)                                        | 0 (0/3)                                         | 0 (0/3)                                                       | Synergy at; 2/2 and 0.5/4 mg/L                                                                                                                                                         |
| PMB/FOF                                 | 0 (0/3)         | NA                                              | NA                                              | NA                                                            | No synergy                                                                                                                                                                             |
| FOF/MEM                                 | 17 (1/6)        | 17 (1/6)                                        | 0 (0/6)                                         | 0 (0/6)                                                       | Synergy at 32/2 mg/L                                                                                                                                                                   |
| SUL/MEM                                 | 67 (4/6)        | 33 (2/6)                                        | 33 (2/6)                                        | 0 (0/6)                                                       | Synergy at 8/16, 4/8, 8/32 and 2/8 mg/L                                                                                                                                                |
| PMB/FOF/MEM                             | 100 (3/3)       | 100 (3/3)                                       | 0 (0/3)                                         | 0 (0/3)                                                       | Synergy at; 0.125/0.25/2, 0.125/4/8 and 0.125/1/16 mg/L                                                                                                                                |
| PMB/SUL/MEM                             | 100 (3/3)       | 100 (3/3)                                       | 0 (0/3)                                         | 0 (0/3)                                                       | Synergy at; 0.5/2/2, 0.5/2/8 and 0.5/2/4 mg/L                                                                                                                                          |

| Study-combinations                      | Synergy % (n/N) | Synergy at concentrations ≤ breakpoints % (n/N) | Synergy at concentrations > breakpoints % (n/N) | Synergy but unclear if at concentration ≤ breakpoints % (n/N) | Notes                                                                                                                                                                                                                                                                      |
|-----------------------------------------|-----------------|-------------------------------------------------|-------------------------------------------------|---------------------------------------------------------------|----------------------------------------------------------------------------------------------------------------------------------------------------------------------------------------------------------------------------------------------------------------------------|
| <b>Oliva A, 2019 [17]</b>               |                 |                                                 |                                                 |                                                               |                                                                                                                                                                                                                                                                            |
| CST/MEM                                 | 100 (1/1)       | 100 (1/1)                                       | 0 (0/1)                                         | 0 (0/1)                                                       | Synergy at 0.5/16mg/L                                                                                                                                                                                                                                                      |
| CST/RIF                                 | 100 (2/2)       | 50 (1/2)                                        | 50 (1/2)                                        | 0 (0/2)                                                       | Synergy at 0.5/0.5 and 0.5/64mg/L.                                                                                                                                                                                                                                         |
| CST/VAN                                 | 50 (1/2)        | 50 (1/2)                                        | 50 (1/2)                                        | 0 (0/2)                                                       | Synergy at 0.5/8 mg/L                                                                                                                                                                                                                                                      |
| <b>Ozger HS, 2019 [18]</b>              |                 |                                                 |                                                 |                                                               |                                                                                                                                                                                                                                                                            |
| CST/ERV                                 | 33 (1/3)        | 0 (0/3)                                         | 33 (1/3)                                        | 0 (0/3)                                                       | Synergy at 32/1 mg/L                                                                                                                                                                                                                                                       |
| <b>Phee LM, 2015 [19] and 2019 [20]</b> |                 |                                                 |                                                 |                                                               |                                                                                                                                                                                                                                                                            |
| CST/FA                                  | 100 (3/3)       | 33 (1/3)                                        | 67 (1/3)                                        | 0 (0/3)                                                       | Synergy against all 3 isolates: against 2 of the 3 isolates at CST concentration >2mg/l (growth inhibition probability was <20% in PK/PD modelling against 1 of these isolates) and at 0.0625/4 mg/L against the other isolate.                                            |
| <b>Shinohara DR, 2019 [22]</b>          |                 |                                                 |                                                 |                                                               |                                                                                                                                                                                                                                                                            |
| PMB/VAN                                 | 100 (3/3)       | 100 (3/3)                                       | 0 (3/3)                                         | 0 (3/3)                                                       | Synergy at 0.5/16, 4/2 and 0.5/8 mg/L                                                                                                                                                                                                                                      |
| <b>Wang J, 2019 [23]</b>                |                 |                                                 |                                                 |                                                               |                                                                                                                                                                                                                                                                            |
| MEM/VAN                                 | 60 (3/5)        | 20 (1/5)                                        | 0 (0/5)                                         | 40 (2/5)                                                      | Synergy present against 3 of 5 isolates, against 1 isolate at concentrations ≤ breakpoints, while against the other 2 isolates it was not possible to confirm whether synergy was present at concentrations ≤ breakpoints.<br>Based on reported FICIs and MICs synergy was |
| SAM/MEM                                 | 40 (2/5)        | 40 (2/5)                                        | 0 (0/5)                                         | 0 (0/5)                                                       |                                                                                                                                                                                                                                                                            |

| Study-combinations      | Synergy % (n/N) | Synergy at concentrations $\leq$ breakpoints % (n/N) | Synergy at concentrations $>$ breakpoints % (n/N) | Synergy but unclear if at concentration $\leq$ breakpoints % (n/N) | Notes                                                                                                                                                                                                                                         |
|-------------------------|-----------------|------------------------------------------------------|---------------------------------------------------|--------------------------------------------------------------------|-----------------------------------------------------------------------------------------------------------------------------------------------------------------------------------------------------------------------------------------------|
| MEM/TZB                 | 40 (2/5)        | 0 (0/5)                                              | 0 (0/5)                                           | 40 (2/5)                                                           | present at concentrations below breakpoints (exact concentrations not available).<br>Not possible to extract whether synergy was present at concentrations $\leq$ breakpoints.                                                                |
| CST/MEM                 | 80 (4/5)        | 40 (2/5)                                             | 0 (0/5)                                           | 40 (2/5)                                                           | Synergy in checkerboard against 4 of 5 isolates, against 2 isolates at concentrations $\leq$ breakpoints, while against the other 2 isolates it was not possible to confirm whether synergy was present at concentrations $\leq$ breakpoints. |
| Chen F, 2018 [24]       |                 |                                                      |                                                   |                                                                    |                                                                                                                                                                                                                                               |
| MEM/AMK                 | 35 (12/34)      | 0 (0/34)                                             | 0 (0/34)                                          | 35 (12/34)                                                         | Concentrations at which synergy was present are not reported                                                                                                                                                                                  |
| MEM/CIP                 | 9 (3/34)        | 0 (0/34)                                             | 0 (0/34)                                          | 9 (3/34)                                                           |                                                                                                                                                                                                                                               |
| AMK/CIP                 | 12 (4/34)       | 0 (0/34)                                             | 0 (0/34)                                          | 12 (4/34)                                                          |                                                                                                                                                                                                                                               |
| Singham-In U, 2018 [25] |                 |                                                      |                                                   |                                                                    |                                                                                                                                                                                                                                               |
| MEM/FOF                 | 0 (0/22)        | NA                                                   | NA                                                | NA                                                                 | No synergy                                                                                                                                                                                                                                    |
| MEM/AMK                 | 100 (2/2)       | 50 (1/2)                                             | 0 (0/2)                                           | 50 (1/2)                                                           | Synergy against both isolates, against one at concentrations $\leq$ breakpoints, against the other unclear if $\leq$ breakpoints                                                                                                              |
| IMP/FOF                 | 65 (15/23)      | 0 (0/23)                                             | 0 (0/23)                                          | 65 (15/23)                                                         | Concentrations at which synergy was present are not reported.                                                                                                                                                                                 |
| IMP/AMK                 | 50 (1/2)        | 0 (0/2)                                              | 0 (0/2)                                           | 50 (1/2)                                                           | Unclear if synergy was present at concetrations $\leq$ breakpoints                                                                                                                                                                            |
| Zhu W, 2018 [26]        |                 |                                                      |                                                   |                                                                    |                                                                                                                                                                                                                                               |

| Study-combinations       | Synergy % (n/N) | Synergy at concentrations ≤ breakpoints % (n/N) | Synergy at concentrations > breakpoints % (n/N) | Synergy but unclear if at concentration ≤ breakpoints % (n/N) | Notes                                                                                                                                                                                                   |
|--------------------------|-----------------|-------------------------------------------------|-------------------------------------------------|---------------------------------------------------------------|---------------------------------------------------------------------------------------------------------------------------------------------------------------------------------------------------------|
| CST/IMP                  | 67 (2/3)        | 67 (2/3)                                        | 0 (0/2)                                         | 0 (0/2)                                                       | Based on FICIs <0.5 and reported MICs synergy was present at <1/4 mg/L                                                                                                                                  |
| CST/DOR                  | 0 (0/2)         | NA                                              | NA                                              | NA                                                            | No synergy                                                                                                                                                                                              |
| CST/FOF                  | 0 (0/3)         | NA                                              | NA                                              | NA                                                            | No synergy                                                                                                                                                                                              |
| CST/CFS                  | 0 (0/3)         | NA                                              | NA                                              | NA                                                            | No synergy                                                                                                                                                                                              |
| CFS/IMP                  | 69 (11/16)      | 56 (9/16)                                       | 12.5 (2/16)                                     | 0 (0/16)                                                      | Based on reported FICIs and MICs synergy was present at: 14A: 64/4, 14B: <32/4, 14D: <8/4, 14F: 8/4, 14G: <32/4, 14H: 64/4, 14I: 16/4, 14J: <16/4, 14L: 16/4, 14N: <16/4, 14O: 32/4 mg/L.               |
| IMP/FOF                  | 55 (11/20)      | 25 (5/20)                                       | 25 (5/20)                                       | 5 (1/20)                                                      | Based on reported FICIs and MICs synergy was present at: 14B: <32/4, 14C: 64/4, 14D: 64/4, 14E: <64/4, 14G: 32/4, 14H: 32/4, 14I: 32/4, 14K: 32/4, 14L: 64/4, 14M: 64/4, 14O: 64/4 mg/L.                |
| <b>Wei W, 2017 [30]</b>  |                 |                                                 |                                                 |                                                               |                                                                                                                                                                                                         |
| CST/LVX                  | 0 (0/1)         | NA                                              | NA                                              | NA                                                            | No synergy                                                                                                                                                                                              |
| <b>Wei WJ, 2017 [31]</b> |                 |                                                 |                                                 |                                                               |                                                                                                                                                                                                         |
| CST/CHL                  | 100 (2/2)       | 50 (1/2)                                        | 50 (1/2)                                        | 0 (0/2)                                                       | Synergy at 0.5/64 and 0.5/2 mg/L                                                                                                                                                                        |
| <b>Bae S, 2016 [32]</b>  |                 |                                                 |                                                 |                                                               |                                                                                                                                                                                                         |
| CST/RIF                  | 100 (9/9)       | 22 (2/9)                                        | 0 (0/9)                                         | 78 (7/9)                                                      | Only presence (FICI≤0.5) or not of synergy is reported. Based on the available data it was possible to confirm synergy at concentrations below breakpoints in only few cases (CST/RIF 2/9, CST/MEM 1/9) |
| CST/TEC                  | 44 (4/9)        | 0 (0/9)                                         | 0 (0/9)                                         | 44 (4/9)                                                      |                                                                                                                                                                                                         |
| CST/VAN                  | 78 (7/9)        | 0 (0/9)                                         | 0 (0/9)                                         | 78 (7/9)                                                      |                                                                                                                                                                                                         |
| CST/MEM                  | 33 (3/9)        | 11 (1/9)                                        | 0 (0/9)                                         | 22 (2/9)                                                      |                                                                                                                                                                                                         |
| CST/ATM                  | 44 (4/9)        | 0 (0/9)                                         | 0 (0/9)                                         | 44 (4/9)                                                      |                                                                                                                                                                                                         |
| CST/CAZ                  | 44 (4/9)        | 0 (0/9)                                         | 0 (0/9)                                         | 44 (4/9)                                                      |                                                                                                                                                                                                         |
| CST/SAM                  | 0 (0/8)         | 0 (0/8)                                         | 0 (0/8)                                         | 0 (0/8)                                                       |                                                                                                                                                                                                         |

| Study-combinations    | Synergy % (n/N) | Synergy at concentrations ≤ breakpoints % (n/N) | Synergy at concentrations > breakpoints % (n/N) | Synergy but unclear if at concentration ≤ breakpoints % (n/N) | Notes                                                                                                                                    |
|-----------------------|-----------------|-------------------------------------------------|-------------------------------------------------|---------------------------------------------------------------|------------------------------------------------------------------------------------------------------------------------------------------|
| CST/SXT               | 13 (1/7)        | 0 (0/7)                                         | 0 (0/7)                                         | 13 (1/7)                                                      |                                                                                                                                          |
| CST/AMK               | 33 (3/6)        | 0 (0/6)                                         | 0 (0/6)                                         | 33 (3/6)                                                      |                                                                                                                                          |
| CST/AZM               | 13 (1/8)        | 0 (0/8)                                         | 0 (0/8)                                         | 13 (1/8)                                                      |                                                                                                                                          |
| CST/TGC               | 0 (0/9)         | NA                                              | NA                                              | NA                                                            |                                                                                                                                          |
| Bowler SL, 2016 [33]  |                 |                                                 |                                                 |                                                               |                                                                                                                                          |
| CST/FA                | 100 (3/3)       | 0 (0/3)                                         | 0 (0/3)                                         | 100 (3/3)                                                     | Only FICI range and MIC range are reported and it was not possible to extract if synergy was present at concentrations below breakpoints |
| Laishram S, 2016 [35] |                 |                                                 |                                                 |                                                               |                                                                                                                                          |
| SUL/MEM               | 32 (16/50)      | 0 (0/50)                                        | 0 (0/50)                                        | 32 (16/50)                                                    | Only FICI range and MIC range are reported and it was not possible to extract if synergy was present at concentrations below breakpoints |
| Leite GC, 2016 [36]   |                 |                                                 |                                                 |                                                               |                                                                                                                                          |
| CST/RIF               | 100 (4/4)       | 50 (2/4)                                        | 0 (0/4)                                         | 50 (2/4)                                                      |                                                                                                                                          |
| CST/VAN               | 100 (7/7)       | 0 (0/7)                                         | 0 (0/7)                                         | 100 (7/7)                                                     |                                                                                                                                          |
| CST/TGC               | 0 (0/1)         | NA                                              | NA                                              | NA                                                            |                                                                                                                                          |
| CST/FOF               | 0 (0/6)         | NA                                              | NA                                              | NA                                                            |                                                                                                                                          |
| CST/GEN               | 0 (0/1)         | NA                                              | NA                                              | NA                                                            | Based on reported MICs and FICIs                                                                                                         |
| CST/MEM               | 100 (7/7)       | 0 (0/7)                                         | 100 (7/7)                                       | 0 (0/7)                                                       |                                                                                                                                          |
| CST/IMP               | 100 (7/7)       | 0 (0/7)                                         | 100 (7/7)                                       | 0 (0/7)                                                       |                                                                                                                                          |
| FOF/GEN               | 91 (10/11)      | 27 (3/11)                                       | 64 (7/11)                                       | 0 (0/11)                                                      |                                                                                                                                          |
| FOF/AMK               | 96 (26/27)      | 41 (11/27)                                      | 55 (15/27)                                      | 0 (0/27)                                                      |                                                                                                                                          |
| Yang H, 2016 [38]     |                 |                                                 |                                                 |                                                               |                                                                                                                                          |
| CST/VAN               | 100 (1/1)       | 0 (0/1)                                         | 0 (0/1)                                         | 100 (1/1)                                                     | Based on a reported FICI of 0.188 synergy was                                                                                            |

| Study-combinations                  | Synergy % (n/N) | Synergy at concentrations ≤ breakpoints % (n/N) | Synergy at concentrations > breakpoints % (n/N) | Synergy but unclear if at concentration ≤ breakpoints % (n/N) | Notes                                                                                                                                    |
|-------------------------------------|-----------------|-------------------------------------------------|-------------------------------------------------|---------------------------------------------------------------|------------------------------------------------------------------------------------------------------------------------------------------|
|                                     |                 |                                                 |                                                 |                                                               | present at either 0.5/16 or 1/32 mg/L                                                                                                    |
| <b>Yang YS, 2016 [39]</b>           |                 |                                                 |                                                 |                                                               |                                                                                                                                          |
| MEM/MIN                             | 0 (0/3)         | NA                                              | NA                                              | NA                                                            | No synergy                                                                                                                               |
| CFS/MIN                             | 0 (0/2)         | NA                                              | NA                                              | NA                                                            | No synergy                                                                                                                               |
| <b>García-Salguero C, 2015 [42]</b> |                 |                                                 |                                                 |                                                               |                                                                                                                                          |
| AMK/IMP                             | 100 (2/2)       | 0 (0/2)                                         | 100 (2/2)                                       | 0 (0/2)                                                       | Synergy at: Ab26: 64/32 or 16/128 mg/L, Ab66: 128/128 mg/L                                                                               |
| AMK/MEM                             | 100 (2/2)       | 0 (0/2)                                         | 100 (2/2)                                       | 0 (0/2)                                                       | Synergy at: Ab26: 64/32 or 32/64 mg/L, Ab66: 128/16 mg/L                                                                                 |
| AMK/FOF                             | 0 (0/2)         | NA                                              | NA                                              | NA                                                            | No synergy                                                                                                                               |
| PLZ/IMP                             | 75 (6/8)        | 0 (0/8)                                         | 63 (5/8)                                        | 13 (1/8)                                                      | Synergy at: Ab2: 2/16 mg/L, AB26: 4/128 mg/L, Ab66: 4/64 or 2/128 mg/L, AB80: 8/2 or 2/8 mg/L, AB102: 2/16 mg/L, AB 113: 2/4 or 1/8 mg/L |
| PLZ/MEM                             | 50 (2/4)        | 0 (0/4)                                         | 50 (2/4)                                        | 0 (0/4)                                                       | Synergy at: Ab26: 4/64 mg/L, Ab125: 16/32 mg/L                                                                                           |
| PLZ/FOF                             | 11 (1/9)        | 0 (0/9)                                         | 11 (1/9)                                        | 0 (0/9)                                                       | Synergy at: Ab80: 8/16 mg/L                                                                                                              |
| <b>Marie MA, 2015 [43]</b>          |                 |                                                 |                                                 |                                                               |                                                                                                                                          |
| SUL/MEM                             | 44 (24/54)      | 0 (0/54)                                        | 0 (0/54)                                        | 44 (24/54)                                                    | Exact FICIs or combination MICs not reported.                                                                                            |
| MEM/TZB                             | 41 (22/54)      | 0 (0/54)                                        | 0 (0/54)                                        | 41 (22/54)                                                    | Exact FICIs or combination MICs not reported.                                                                                            |
| <b>Vourli S, 2015 [45]</b>          |                 |                                                 |                                                 |                                                               |                                                                                                                                          |
| CST/MEM                             | 100 (2/2)       | 0 (0/2)                                         | 100 (2/2)                                       | 0 (0/2)                                                       | Synergy at MEM concentrations 16-64mg/L and CST concentrations 0.0625-1.                                                                 |
| CST/SAM                             | 0 (0/2)         | NA                                              | NA                                              | NA                                                            | No synergy                                                                                                                               |
| SAM/MEM                             | 0 (0/5)         | NA                                              | NA                                              | NA                                                            | No synergy                                                                                                                               |
| <b>Majewski P, 2014</b>             |                 |                                                 |                                                 |                                                               |                                                                                                                                          |

| Study-combinations          | Synergy % (n/N) | Synergy at concentrations ≤ breakpoints % (n/N) | Synergy at concentrations > breakpoints % (n/N) | Synergy but unclear if at concentration ≤ breakpoints % (n/N) | Notes                                                                                                                                                                                                                         |
|-----------------------------|-----------------|-------------------------------------------------|-------------------------------------------------|---------------------------------------------------------------|-------------------------------------------------------------------------------------------------------------------------------------------------------------------------------------------------------------------------------|
| <b>[47]</b>                 |                 |                                                 |                                                 |                                                               |                                                                                                                                                                                                                               |
| IMP/RIF                     | 40 (4/10)       | 0 (0/10)                                        | 20 (2/10)                                       | 20 (2/10)                                                     | Synergy at: Isolate 12 (FICI=0.5): 16/1 mg/L, Isolate 34 (FICI=0.5): 16/1 mg/L, Isolate 53 (FICI=0.375): 8/0.5 or 4/1 mg/L, Isolate 91 : 8/0.5 or 4/1 mg/L,                                                                   |
| <b>Percin D, 2014 [50]</b>  |                 |                                                 |                                                 |                                                               |                                                                                                                                                                                                                               |
| CST/VAN                     | 90 (9/10)       | 0 (0/10)                                        | 0 (0/10)                                        | 90 (9/10)                                                     | MICs for each isolate not available.                                                                                                                                                                                          |
| <b>Sun Y, 2014 [51]</b>     |                 |                                                 |                                                 |                                                               |                                                                                                                                                                                                                               |
| CFS/MEM                     | 0 (0/11)        | NA                                              | NA                                              | NA                                                            | No synergy                                                                                                                                                                                                                    |
| MEM/AMK                     | 0 (0/9)         | NA                                              | NA                                              | NA                                                            | No synergy                                                                                                                                                                                                                    |
| MEM/CIP                     | 9 (1/11)        | 0 (0/11)                                        | 9 (1/11)                                        | 0 (0/11)                                                      | Synergy at 16/32 mg/L                                                                                                                                                                                                         |
| MEM/AZM                     | 0 (0/12)        | NA                                              | NA                                              | NA                                                            | No synergy                                                                                                                                                                                                                    |
| <b>Wang Y, 2014 [52]</b>    |                 |                                                 |                                                 |                                                               |                                                                                                                                                                                                                               |
| IMP/RIF                     | 67 (12/16)      | 61 (11/16)                                      | 6 (1/16)                                        | 0 (0/16)                                                      | Synergy at: 1/2, 2/2, 0.5/1, 2/1, 2/1, 4/4, 2/1, 2/1, 4/1, 8/4, 8/0.25, 1/1, 16/8, 8/1 and 16/2 mg/L                                                                                                                          |
| <b>Cetin ES, 2013 [53]</b>  |                 |                                                 |                                                 |                                                               |                                                                                                                                                                                                                               |
| RIF/SAM                     | 100 (7/7)       | 57 (4/7)                                        | 14 (1/7)                                        | 29 (2/7)                                                      | Synergy at: Isolate 5: 1/1 or 0.125/8 mg/L, Isolate 11: 0.5/4 mg/L, Isolate 12: 1/2 or 0.125/16 mg/L, Isolate 14: 4/4 or 0.5/32 mg/L, Isolate 15: 1/1 or 0.125/8 mg/L, Isolate 16: 1/2 or 0.125/16 mg/L, Isolate 20: 1/8 mg/L |
| RIF/CFS                     | 29 (2/7)        | 14 (1/7)                                        | 0 (0/7)                                         | 14 (1/7)                                                      | Synergy at: Isolate 11: 1/16 mg/L, isolate 20: 64/0.5 or 32/1 mg/L                                                                                                                                                            |
| <b>O'Hara JA, 2013 [56]</b> |                 |                                                 |                                                 |                                                               |                                                                                                                                                                                                                               |
| CST/DOR                     | 67 (2/3)        | 33 (1/3)                                        | 33 (1/3)                                        | 0 (0/3)                                                       | Synergy at: JA637 (FICI 0.31): 64/2 or 16/8 mg/L, JA566 (FICI 0.13): 0.25/2 mg/L                                                                                                                                              |
| CST/VAN                     | 100 (3/3)       | 0 (0/3)                                         | 67 (2/3)                                        | 33 (1/3)                                                      | Synergy at: JA637 (FICI 0.28): 64/8 or 8/64 mg/L,                                                                                                                                                                             |

| Study-combinations            | Synergy % (n/N) | Synergy at concentrations ≤ breakpoints % (n/N) | Synergy at concentrations > breakpoints % (n/N) | Synergy but unclear if at concentration ≤ breakpoints % (n/N) | Notes                                                                     |
|-------------------------------|-----------------|-------------------------------------------------|-------------------------------------------------|---------------------------------------------------------------|---------------------------------------------------------------------------|
|                               |                 |                                                 |                                                 |                                                               | JA566 (FICI 0.14): 0.5/4 or 0.0625/32 mg/L, JA942 (FICI 0.25): 32/32 mg/L |
| <b>Principe L, 2013 [57]</b>  |                 |                                                 |                                                 |                                                               | No synergy                                                                |
| DOR/VAN                       | 0 (0/3)         | NA                                              | NA                                              | NA                                                            |                                                                           |
| DOR/TGC                       | 100 (3/3)       | 33 (1/3)                                        | 0 (0/3)                                         | 67 (2/3)                                                      | Synergy at; ≤8/2, ≤16/2, ≤32/1.                                           |
| DOR/AMK                       | 25 (1/4)        | 0 (0/4)                                         | 0 (0/4)s                                        | 25 (1/4)                                                      | Synergy at ≤16/64 mg/L                                                    |
| DOR/CST                       | 0 (0/1)         | NA                                              | NA                                              | NA                                                            |                                                                           |
| SAM/DOR                       | 0 (0/1)         | NA                                              | NA                                              | NA                                                            |                                                                           |
| DOR/RIF                       | 0 (0/1)         | NA                                              | NA                                              | NA                                                            |                                                                           |
| <b>Deveci A, 2012 [59]</b>    |                 |                                                 |                                                 |                                                               |                                                                           |
| SUL/CAZ                       | 70 (7/10)       | 10 (1/10)                                       | 60 (6/10)                                       | 0 (0/10)                                                      | Synergy at: 16/32, 8/32, 32/2, 32/2, 64/4, 32/2 and 8/4 mg/L,             |
| SUL/MEM                       | 0 (0/9)         | NA                                              | NA                                              | NA                                                            |                                                                           |
| SUL/CRO                       | 40 (4/10)       | 0 (0/10)                                        | 40 (4/10)                                       | 0 (0/10)                                                      | Synergy at: 16/512, 256/64, 16/64, 32/128 mg/L                            |
| SUL/CIP                       | 80 (8/10)       | 20 (2/10)                                       | 60 (6/10)                                       | 0 (0/10)                                                      | Synergy at: 8/0.5, 16/2, 16/8, 128/1, 64/1, 128/0.5, 64/1, 8/1 mg/L       |
| SUL/GEN                       | 80 (8/10)       | 20 (2/10)                                       | 60 (6/10)                                       | 0 (0/10)                                                      | Synergy at: 8/16, 8/8, 8/64, 16/16, 32/8, 32/8, 32/8, 8/8 mg/L            |
| SUL/FEP                       | 44 (4/9)        | 0 (0/9)                                         | 44 (4/9)                                        | 0 (0/9)                                                       | Synergy at: 64/4, 64/4, 64/4, 32/4 mg/L                                   |
| <b>Vidaillac C, 2012 [61]</b> |                 |                                                 |                                                 |                                                               |                                                                           |
| CST/VAN                       | 100 (1/1)       | 100 (1/1)                                       | 0 (0/1)                                         | 0 (0/1)                                                       | FICI 0.18 → Synergy at: 1/8 or 0.5/16 mg/L                                |
| CST/TMP                       | 100 (1/1)       | 0 (0/1)                                         | 100 (1/1)                                       | 0 (0/1)                                                       | FICI 0.37 → Synergy at: 2/4 or 1/8 mg/L                                   |
| CST/SXT                       | 100 (1/1)       | 100 (1/1)                                       | 0 (0/1)                                         | 0 (0/1)                                                       | FICI 0.20 (?, <0.25) → Synergy at: <2/2/38 mg/L                           |
| <b>Santimaleeworagun</b>      |                 |                                                 |                                                 |                                                               |                                                                           |

| Study-combinations           | Synergy % (n/N) | Synergy at concentrations ≤ breakpoints % (n/N) | Synergy at concentrations > breakpoints % (n/N) | Synergy but unclear if at concentration ≤ breakpoints % (n/N) | Notes                                                                                                                                                                                                                              |
|------------------------------|-----------------|-------------------------------------------------|-------------------------------------------------|---------------------------------------------------------------|------------------------------------------------------------------------------------------------------------------------------------------------------------------------------------------------------------------------------------|
| <b>W, 2011 [62]</b>          |                 |                                                 |                                                 |                                                               |                                                                                                                                                                                                                                    |
| SUL/IMP                      | 0 (0/6)         | NA                                              | NA                                              | NA                                                            | No synergy                                                                                                                                                                                                                         |
| SUL/FOF                      | 67 (4/6)        | 33 (2/6)                                        | 17 (1/6)                                        | 17 (1/6)                                                      | Synergy at: AB164 (FICI 0.48<0.5): <8/32 mg/L, AB167 (FICI 0.37): 8/32 or 4/64 mg/L, AB198 (FICI 0.28): 8/4 or 1/32 mg/L, AB313 (FICI 0.47<0.5): <16/128 mg/L                                                                      |
| <b>Tan TY, 2011 [64]</b>     |                 |                                                 |                                                 |                                                               |                                                                                                                                                                                                                                    |
| PMB/TGC                      | 75 (3/4)        | 0 (0/4)                                         | 50 (2/4)                                        | 25 (1/4)                                                      | Based on reported FICIs and MICs synergy was present in CHBD at the following concentrations: For isolate 18351: 4/0.5 or 1/2 mg/dl. For isolate 9447: 4/1 mg/L. For isolate 11171: 4/1 mg/L. No synergy in TKA at 2/2 mg/L.       |
| PMB/RIF                      | 100 (3/3)       | 33 (1/3)                                        | 33 (1/3)                                        | 33 (1/3)                                                      | Based on reported FICIs and MICs synergy was present in CHBD at the following concentrations: For isolate 27640: 2/1 or 0.5/4 mg/L For isolate 9447: 1/1 or 0.5/2 mg/dl. For isolate 11171: 4/1 mg/L. For isolate 11171: 4/8 mg/L. |
| TGC/RIF                      | 33 (1/3)        | 0 (0/3)                                         | 33 (1/3)                                        | 0 (0/3)                                                       | Based on reported FICIs and MICs synergy was present in CHBD at 4/4 or 2/8 mg/L.                                                                                                                                                   |
| <b>Principe L, 2009 [73]</b> |                 |                                                 |                                                 |                                                               |                                                                                                                                                                                                                                    |
| TGC/LVX                      | 22 (4/18)       | 0 (0/18)                                        | 22 (4/18)                                       | 0 (0/18)                                                      | Synergy present in checkerboard at: 0.25/4 (isolate 5, 11 and 75), 2/4 (isolate 16).                                                                                                                                               |
| TGC/TZP                      | 0 (0/18)        | NA                                              | NA                                              | NA                                                            | No synergy                                                                                                                                                                                                                         |
| TGC/AMK                      | 14 (2/14)       | 7 (1/14)                                        | 7 (1/14)                                        | 0 (1/14)                                                      | Synergy present in checkerboard at: 1/16 (isolate 11) and 1/64 mg/L (isolate 71)                                                                                                                                                   |

| Study-combinations                   | Synergy % (n/N) | Synergy at concentrations ≤ breakpoints % (n/N) | Synergy at concentrations > breakpoints % (n/N) | Synergy but unclear if at concentration ≤ breakpoints % (n/N) | Notes                                          |
|--------------------------------------|-----------------|-------------------------------------------------|-------------------------------------------------|---------------------------------------------------------------|------------------------------------------------|
| TGC/IMP                              | 8 (1/12)        | 0 (0/12)                                        | 8 (1/12)                                        | 0 (0/12)                                                      | Synergy present in checkerboard at 0.25/8 mg/L |
| TGC/RIF                              | 0 (0/13)        | NA                                              | NA                                              | NA                                                            | No synergy                                     |
| SAM/TGC                              | 0 (0/6)         | NA                                              | NA                                              | NA                                                            | No synergy                                     |
| <b>Sader HS, 2005 [77]</b>           |                 |                                                 |                                                 |                                                               |                                                |
| SAM/FEP                              | 100 (2/2)       | 50 (1/2)                                        | 50 (1/2)                                        | 0 (0/2)                                                       | Combination MICs: 8/4/32 and 16/8/16 mg/L      |
| <b>Sader HS, 2005 [78]</b>           |                 |                                                 |                                                 |                                                               |                                                |
| ATM/FEP                              | 0 (0/3)         | NA                                              | NA                                              | NA                                                            | No synergy at 8/8 mg/L                         |
| ATM/CAZ                              | 0 (0/4)         | NA                                              | NA                                              | NA                                                            | No synergy at 8/8 mg/L                         |
| ATM/MEM                              | 0 (0/3)         | NA                                              | NA                                              | NA                                                            | No synergy at 8/4 mg/L                         |
| SAM/ATM                              | 0 (0/1)         | NA                                              | NA                                              | NA                                                            | No synergy at 8/4/8 mg/L                       |
| <b>Fernández-Cuenca F, 2003 [83]</b> |                 |                                                 |                                                 |                                                               |                                                |
| AZM/IMP                              | 0 (0/2)         | NA                                              | NA                                              | NA                                                            | No synergy                                     |
| AZM/CAZ                              | 33 (1/3)        | 0 (0/3)                                         | 33 (1/3)                                        | 0 (0/3)                                                       | Synergy at 64/128 mg/L                         |
| AZM/AMK                              | 0 (0/2)         | NA                                              | NA                                              | NA                                                            | No synergy                                     |
| AZM/CIP                              | 0 (0/3)         | NA                                              | NA                                              | NA                                                            | No synergy                                     |

#### 4.5 Proportion of synergy and assessment of clinical relevance of observed synergy in time-kill assays (study level data)

| Study-combinations                                        | Synergy % (n/N) | Synergy at concenstrations $\leq$ breakpoints % (n/N) | Synergy at concentrations $>$ breakpoints % (n/N) | Synergy but unclear if at concentration $\leq$ breakpoints % (n/N) | Concentrations at which synergy was evaluated                                                                                                                                                        |
|-----------------------------------------------------------|-----------------|-------------------------------------------------------|---------------------------------------------------|--------------------------------------------------------------------|------------------------------------------------------------------------------------------------------------------------------------------------------------------------------------------------------|
| <b>Nwabor OF 2021 [4]</b>                                 |                 |                                                       |                                                   |                                                                    | TKA conducted at the following concentrations: FOF 1xMIC, other at $\frac{1}{2}$ and $\frac{1}{4}$ x MIC                                                                                             |
| FOF/DOR                                                   |                 | NA                                                    | NA                                                | NA                                                                 | No synergy                                                                                                                                                                                           |
| FOF/CIP                                                   |                 | NA                                                    | NA                                                | NA                                                                 | No synergy                                                                                                                                                                                           |
| FOF/TGC                                                   |                 |                                                       |                                                   |                                                                    | Synergy at 128/2 and 128/1 mg/L                                                                                                                                                                      |
| <b>Li J, 2020 [6]</b>                                     |                 |                                                       |                                                   |                                                                    | TKA only conducted at 0.5x and 1x MIC                                                                                                                                                                |
| CST/MEM                                                   | 100 (1/1)       | 0 (0/1)                                               | 100 (1/1)                                         | 0 (0/1)                                                            | Synergy at: 4/32 and 4/16 mg/L.                                                                                                                                                                      |
| CST/LVX                                                   | 100 (1/1)       | 0 (0/1)                                               | 100 (1/1)                                         | 0 (0/1)                                                            | Synergy at: 4/16 and 4/8 mg/L.                                                                                                                                                                       |
| <b>Mohd Sazlly Lim S 2020 [8], 2021 [9], 2021 [10,85]</b> |                 |                                                       |                                                   |                                                                    |                                                                                                                                                                                                      |
| SUL/FOF                                                   | 50 (2/4)        | 0 (0/4)                                               | 50 (2/4)                                          | 0 (0/4)                                                            | Synergy at 128/128 (n=2) mg/L. Based on semi-mechanistic PK/PD modelling, the SUL/FOF regimen at best demonstrated a probability of target attainment of 2-log <sub>10</sub> kill at 24 h of 72%.    |
| SUL/MEM                                                   | 100 (2/2)       | 0 (0/2)                                               | 100 (2/2)                                         | 0 (0/2)                                                            | Synergy at 64/32 and 128/64 mg/L. Based on semi-mechanistic PK/PD modelling, the MEM/SUL regimen at best demonstrated a probability of target attainment of 2-log <sub>10</sub> kill at 24 h of 34%. |

| Study-combinations                      | Synergy % (n/N) | Synergy at concenstrations ≤ breakpoints % (n/N) | Synergy at concentrations > breakpoints % (n/N) | Synergy but unclear if at concentration ≤ breakpoints % (n/N) | Concentrations at which synergy was evaluated           |
|-----------------------------------------|-----------------|--------------------------------------------------|-------------------------------------------------|---------------------------------------------------------------|---------------------------------------------------------|
| <b>Rodriguez CH, 2020 [11]</b>          |                 |                                                  |                                                 |                                                               |                                                         |
| SUL/AVI                                 | 100 (1/1)       | 100 (1/1)                                        | 0 (0/1)                                         | 0 (0/1)                                                       | Bactericidal activity at SUL/AVI concentrations 8/4mg/L |
| <b>Gaudereto JJ, 2019 [12]</b>          |                 |                                                  |                                                 |                                                               |                                                         |
| CZA/MEM                                 | 0 (0/11)        | NA                                               | NA                                              | NA                                                            | TKA conducted at 1x and 0.5x MIC. No synergy.           |
| <b>Mataraci Kara E, 2019 [14]</b>       |                 |                                                  |                                                 |                                                               |                                                         |
| CST/CZA                                 | 100 (2/2)       | 0 (0/2)                                          | 100 (2/2)                                       | 0 (0/2)                                                       | Synergy assessed in TKA only 1x or 4x the MIC           |
| CZA/LVX                                 | 75 (3/4)        | 0 (0/4)                                          | 75 (3/4)                                        | 0 (0/4)                                                       |                                                         |
| CZA/TGC                                 | 75 (3/4)        | 0 (0/4)                                          | 75 (3/4)                                        | 0 (0/4)                                                       |                                                         |
| CZA/TOB                                 | 50 (1/2)        | 0 (0/2)                                          | 50 (1/2)                                        | 0 (0/2)                                                       |                                                         |
| CZA/MEM                                 | 75 (3/4)        | 0 (0/4)                                          | 75 (3/4)                                        | 0 (0/4)                                                       |                                                         |
| <b>Oliva A, 2019 [17]</b>               |                 |                                                  |                                                 |                                                               |                                                         |
| CST/MEM                                 | 100 (1/1)       | 0 (0/1)                                          | 100 (1/1)                                       | 0 (0/1)                                                       | Synergy at 4/64 mg/L                                    |
| CST/RIF                                 | 100 (2/2)       | 0 (0/2)                                          | 100 (2/2)                                       | 0 (0/2)                                                       | Synergy at 4/2 and 4/256 mg/L                           |
| CST/VAN                                 | 100 (2/2)       | 0 (0/2)                                          | 100 (2/2)                                       | 0 (0/2)                                                       | Synergy at at 4/16 and 256/16 mg/L                      |
| <b>Phee LM, 2015 [19] and 2019 [20]</b> |                 |                                                  |                                                 |                                                               |                                                         |
| CST/FA                                  | 100 (1/1)       | 0 (0/1)                                          | 100 (1/1)                                       | 0 (0/1)                                                       | Synergy at 2/16 mg/L                                    |
| <b>Poulakou G, 2019 [21]</b>            |                 |                                                  |                                                 |                                                               |                                                         |
| CST/DAP                                 | 0 (0/1)         | NA                                               | NA                                              | NA                                                            | No synergy                                              |

| Study-combinations              | Synergy % (n/N) | Synergy at concenstrations ≤ breakpoints % (n/N) | Synergy at concentrations > breakpoints % (n/N) | Synergy but unclear if at concentration ≤ breakpoints % (n/N) | Concentrations at which synergy was evaluated                    |
|---------------------------------|-----------------|--------------------------------------------------|-------------------------------------------------|---------------------------------------------------------------|------------------------------------------------------------------|
| <b>Shinohara DR, 2019 [22]</b>  |                 |                                                  |                                                 |                                                               |                                                                  |
| PMB/VAN                         | 67 (2/3)        | 0 (0/3)                                          | 67 (2/3)                                        | 0 (0/3)                                                       | TKA only conducted at 0.5 x MIC (8/128, 8/128 and 2/128 mg/L)    |
| <b>Wang J, 2019 [23]</b>        |                 |                                                  |                                                 |                                                               |                                                                  |
| CST/MEM                         | 100 (2/2)       | 0 (0/2)                                          | 100 (2/2)                                       | 0 (0/2)                                                       | Synergy only assessed at 4/16 and 8/16mg/L.                      |
| <b>Singham-In U, 2018 [25]</b>  |                 |                                                  |                                                 |                                                               |                                                                  |
| IMP/FOF                         | 89 (8/9)        | 0 (0/9)                                          | 89 (8/9)                                        | 0 (0/9)                                                       | Concentrations used in TKA were above breakpoints                |
| <b>Lenhard JR, 2017 [27,28]</b> |                 |                                                  |                                                 |                                                               |                                                                  |
| PMB/MEM                         | 0 (0/2)         | NA                                               | NA                                              | NA                                                            | TKA conducted at: SAM 132/70 mg/L, MEM 55mg/L, PMB 1.5 mg/L      |
| PMB/SAM                         | 0 (0/2)         | NA                                               | NA                                              | NA                                                            |                                                                  |
| MEM/SAM                         | 0 (0/2)         | NA                                               | NA                                              | NA                                                            |                                                                  |
| PMB/MEM/SAM                     | 50 (1/2)        | 0 (0/2)                                          | 50 (1/2)                                        | 0 (0/2)                                                       |                                                                  |
| <b>Wei W, 2017 [30]</b>         |                 |                                                  |                                                 |                                                               |                                                                  |
| CST/LVX                         | 0 (0/1)         | NA                                               | NA                                              | NA                                                            | No synergy                                                       |
| <b>Wei WJ, 2017 [31]</b>        |                 |                                                  |                                                 |                                                               |                                                                  |
| CST/CHL                         | 100 (2/2)       | 0 (0/2)                                          | 100 (2/2)                                       | 0 (0/2)                                                       | Synergy at 2/32mg/L                                              |
| <b>Bowler SL, 2016 [33]</b>     |                 |                                                  |                                                 |                                                               |                                                                  |
| CST/FA                          | 67 (2/3)        | 0 (0/3)                                          | 67 (2/3)                                        | 0 (0/3)                                                       | TKA conducted at; CST 2 mg/L, VAN 20 mg/L, DOR 8 mg/L, FA 8 mg/L |
| CST/VAN                         | 33 (1/3)        | 33 (1/3)                                         | 0 (0/3)                                         | 0 (0/3)                                                       |                                                                  |

| Study-combinations                  | Synergy % (n/N) | Synergy at concenstrations ≤ breakpoints % (n/N) | Synergy at concentrations > breakpoints % (n/N) | Synergy but unclear if at concentration ≤ breakpoints % (n/N) | Concentrations at which synergy was evaluated                                                                                           |
|-------------------------------------|-----------------|--------------------------------------------------|-------------------------------------------------|---------------------------------------------------------------|-----------------------------------------------------------------------------------------------------------------------------------------|
| CST/DOR                             | 33 (1/3)        | 33 (1/3)                                         | 0 (0/3)                                         | 0 (0/3)                                                       |                                                                                                                                         |
| <b>Laishram S, 2016 [35]</b>        |                 |                                                  |                                                 |                                                               |                                                                                                                                         |
| SUL/MEM                             | 58 (29/50)      | 0 (0/50)                                         | 8 (4/50)                                        | 50 (25/50)                                                    | Based on concentrations used (0.5x MIC) and reported MIC50 synergy was present at above breakpoints in TKA against at least 4 isolates. |
| <b>Park GC, 2016 [37]</b>           |                 |                                                  |                                                 |                                                               |                                                                                                                                         |
| CST/DOR                             | 59 (10/17)      | 59 (10/17)                                       | 0 (0/17)                                        | 0 (0/17)                                                      | TKA assays were conducted at the following concentrations: CST 2mg/L, TGC 2mg/L, DOR 8mg/L                                              |
| CST/TGC                             | 58 (7/12)       | 58 (7/12)                                        | 0 (0/12)                                        | 0 (0/12)                                                      |                                                                                                                                         |
| TGC/DOR                             | 11 (5/46)       | 11 (5/46)                                        | 0 (0/46)                                        | 0 (0/46)                                                      |                                                                                                                                         |
| <b>Yang H, 2016 [38]</b>            |                 |                                                  |                                                 |                                                               |                                                                                                                                         |
| CST/VAN                             | 0 (0/1)         | 0 (0/1)                                          | 0 (0/1)                                         | 0 (0/1)                                                       | No synergy at 2/20 mg/L                                                                                                                 |
| <b>Yang YS, 2016 [39]</b>           |                 |                                                  |                                                 |                                                               |                                                                                                                                         |
| MEM/MIN                             | 0 (0/3)         | NA                                               | NA                                              | NA                                                            | No synergy at                                                                                                                           |
| CFS/MIN                             | 50 (1/2)        | 0 (0/2)                                          | 50 (1/2)                                        | 0 (0/2)                                                       | Synergy at 16/16/16 mg/L                                                                                                                |
| <b>García-Salguero C, 2015 [42]</b> |                 |                                                  |                                                 |                                                               |                                                                                                                                         |
| PLZ/FOF                             | 0 (0/2)         | NA                                               | NA                                              | NA                                                            | No synergy at 4/64 mg/L. Regrowth at 24 hours, despite initial bactericidal killing                                                     |
| <b>Rodriguez CH, 2015 [44]</b>      |                 |                                                  |                                                 |                                                               |                                                                                                                                         |
| IMP/MIN                             | 0 (0/1)         | NA                                               | NA                                              | NA                                                            | TKA conducted at the following concentrations: IMP 8mg/L, MIN 4 mg/L, RIF 4 mg/L                                                        |
| IMP/RIF                             | 0 (0/1)         | NA                                               | NA                                              | NA                                                            |                                                                                                                                         |

| Study-combinations            | Synergy % (n/N) | Synergy at concenstrations ≤ breakpoints % (n/N) | Synergy at concentrations > breakpoints % (n/N) | Synergy but unclear if at concentration ≤ breakpoints % (n/N) | Concentrations at which synergy was evaluated                                                                |
|-------------------------------|-----------------|--------------------------------------------------|-------------------------------------------------|---------------------------------------------------------------|--------------------------------------------------------------------------------------------------------------|
| <b>Galani I, 2014 [46]</b>    |                 |                                                  |                                                 |                                                               |                                                                                                              |
| CST/DAP                       | 0 (0/4)         | NA                                               | NA                                              | NA                                                            | TKA conducted at 0.25, 0.5 and 1x MIC                                                                        |
| <b>Nastro M, 2014 [48]</b>    |                 |                                                  |                                                 |                                                               |                                                                                                              |
| CST/RIF                       | 100 (4/4)       | 0 (0/4)                                          | 100 (4/4)                                       | 0 (0/4)                                                       | Synergy at RIF 4 mg/L, CST 2 mg/L                                                                            |
| <b>Oleksium LM, 2014 [49]</b> |                 |                                                  |                                                 |                                                               |                                                                                                              |
| CST/DOR                       | 83 (5/6)        | 83 (5/6)                                         | 0 (0/6)                                         | 0 (0/6)                                                       | TKA conducted at the following concentrations: CST 2mg/L, DOR 8mg/L, SUL 4mg/L                               |
| CST/SUL                       | 33 (2/6)        | 33 (2/6)                                         | 0 (0/6)                                         | 0 (0/6)                                                       |                                                                                                              |
| CST/DOR/SUL                   | 100 (6/6)       | 100 (6/6)                                        | 0 (0/6)                                         | 0 (0/6)                                                       |                                                                                                              |
| SUL/DOR                       | 24 (4/17)       | 24 (4/17)                                        | 0 (0/17)                                        | 0 (0/17)                                                      |                                                                                                              |
| <b>Percin D, 2014 [50]</b>    |                 |                                                  |                                                 |                                                               |                                                                                                              |
| CST/VAN                       | 100 (10/10)     | 100 (10/10)                                      | 0 (0/10)                                        | 0 (0/10)                                                      | TKA was conducted at VAN 20 mg/L and CST 2 mg/L.                                                             |
| <b>O'Hara JA, 2013 [56]</b>   |                 |                                                  |                                                 |                                                               |                                                                                                              |
| CST/DOR                       | 100 (3/3)       | 100 (3/3)                                        | 0 (0/3)                                         | 0 (0/3)                                                       | TKA conducted at: CST 2mg/L, DOR 8mg/L, VAN 20 mg/L.                                                         |
| CST/VAN                       | 67 (2/3)        | 67 (2/3)                                         | 0 (0/3)                                         | 0 (0/3)                                                       |                                                                                                              |
| DOR/VAN                       | 0 (0/3)         | NA                                               | NA                                              | NA                                                            |                                                                                                              |
| CST/VAN/DOR                   | 100 (3/3)       | 100 (3/3)                                        | 0 (0/3)                                         | 0 (0/3)                                                       |                                                                                                              |
| <b>Queenan AM, 2013 [58]</b>  |                 |                                                  |                                                 |                                                               |                                                                                                              |
| DOR/CIP                       | 0 (0/1)         | NA                                               | NA                                              | NA                                                            | TKA conducted at maximum clinically achievable concentrations (DOR 18.8 mg/L, CIP 4.56 mg/L, LVX 11.5 mg/L). |
| DOR/LVX                       | 0 (0/1)         | NA                                               | NA                                              | NA                                                            |                                                                                                              |
| <b>Peck KR, 2012 [60]</b>     |                 |                                                  |                                                 |                                                               |                                                                                                              |

| Study-combinations                    | Synergy % (n/N) | Synergy at concenstrations ≤ breakpoints % (n/N) | Synergy at concentrations > breakpoints % (n/N) | Synergy but unclear if at concentration ≤ breakpoints % (n/N) | Concentrations at which synergy was evaluated                                                                                                                                                             |
|---------------------------------------|-----------------|--------------------------------------------------|-------------------------------------------------|---------------------------------------------------------------|-----------------------------------------------------------------------------------------------------------------------------------------------------------------------------------------------------------|
| CST/IMP                               | 0 (0/2)         | NA                                               | NA                                              | NA                                                            | TKA only conducted at 0.5x and 1xMIC. Graphs available only for CST/IMP. Discordant results comparing the table to the TKA curves (reported synergy in the table but no synergy examining the TKA curve). |
| CST/RIF                               | 100 (1/1)       | 0 (0/1)                                          | 0 (0/1)                                         | 100 (1/1)                                                     |                                                                                                                                                                                                           |
| SAM/IMP                               | 100 (6/6)       | 0 (0/6)                                          | 0 (0/6)                                         | 100 (6/6)                                                     |                                                                                                                                                                                                           |
| <b>Vidaillac C, 2012 [61]</b>         |                 |                                                  |                                                 |                                                               |                                                                                                                                                                                                           |
| CST/VAN                               | 100 (1/1)       | 0 (0/1)                                          | 100 (1/1)                                       | 0 (0/1)                                                       | TKA conducted only at 0.25x (CST 2 mg/L, VAN 32 mg/L, TMP 8 mg/L and SXT 4/76.5 mg/L) and 0.5x (CST 8 mg/L, VAN 64 mg/L, TMP 16 mg/L and SXT 8/153 mg/L) the MIC                                          |
| CST/TMP                               | 100 (1/1)       | 0 (0/1)                                          | 100 (1/1)                                       | 0 (0/1)                                                       |                                                                                                                                                                                                           |
| CST/SXT                               | 100 (1/1)       | 0 (0/1)                                          | 100 (1/1)                                       | 0 (0/1)                                                       |                                                                                                                                                                                                           |
| <b>Pachón-Ibáñez ME, 2011 [63]</b>    |                 |                                                  |                                                 |                                                               |                                                                                                                                                                                                           |
| RIF/IMP                               | 100 (2/2)       | 0 (0/2)                                          | 100 (2/2)                                       | 0 (0/2)                                                       | TKA conducted only at 1x MIC and at Cmax (i.e. at concentrations > breakpoints)                                                                                                                           |
| RIF/SUL                               | 100 (2/2)       | 0 (0/2)                                          | 100 (2/2)                                       | 0 (0/2)                                                       |                                                                                                                                                                                                           |
| <b>Santimaleeworagun W, 2011 [62]</b> |                 |                                                  |                                                 |                                                               |                                                                                                                                                                                                           |
| SUL/FOF                               | 83 (5/6)        | 0 (0/6)                                          | 83 (5/6)                                        | 0 (0/6)                                                       | TKA was only conducted at SUL 1xMIC (i.e. above breakpoints of resistance).                                                                                                                               |
| <b>Tan TY, 2011 [64]</b>              |                 |                                                  |                                                 |                                                               |                                                                                                                                                                                                           |
| PMB/TGC                               | 0 (0/4)         | NA                                               | NA                                              | NA                                                            | 2/2 mg/L                                                                                                                                                                                                  |
| PMB/RIF                               | 33 (1/3)        | 33 (1/3)                                         | 0 (0/3)                                         | 0 (0/3)                                                       | 2/2 mg/L                                                                                                                                                                                                  |

| Study-combinations                             | Synergy % (n/N) | Synergy at concenstrations ≤ breakpoints % (n/N) | Synergy at concentrations > breakpoints % (n/N) | Synergy but unclear if at concentration ≤ breakpoints % (n/N) | Concentrations at which synergy was evaluated                                                                                                                                     |
|------------------------------------------------|-----------------|--------------------------------------------------|-------------------------------------------------|---------------------------------------------------------------|-----------------------------------------------------------------------------------------------------------------------------------------------------------------------------------|
| TGC/RIF                                        | 0 (0/3)         | NA                                               | NA                                              | NA                                                            | 2/2 mg/L                                                                                                                                                                          |
| <b>Pankuch GA, 2010 [67]</b>                   |                 |                                                  |                                                 |                                                               |                                                                                                                                                                                   |
| DOR/LVX                                        | 60 (3/5)        | 0 (0/5)                                          | 60 (3/5)                                        | 0 (0/5)                                                       | Synergy at 4/16, 8/16 and 16/18 mg/L                                                                                                                                              |
| DOR/AMK                                        | 100 (2/2)       | 0 (0/2)                                          | 100 (2/2)                                       | 0 (0/2)                                                       | Synergy at 32/64 and 8/512 mg/L                                                                                                                                                   |
| DOR/CST                                        | 100 (4/4)       | 0 (0/4)                                          | 100 (4/4)                                       | 0 (0/4)                                                       | Synergy at 4/2, 4/8, 8/4 and 8/2 mg/L                                                                                                                                             |
| <b>Rodriguez CH, 2010 [68]</b>                 |                 |                                                  |                                                 |                                                               |                                                                                                                                                                                   |
| IMP/RIF                                        | 0 (0/4)         | NA                                               | NA                                              | NA                                                            | 8/4 mg/L.                                                                                                                                                                         |
| IMP/GEN                                        | 0 (0/2)         | NA                                               | NA                                              | NA                                                            | 8/4 mg/L.                                                                                                                                                                         |
| <b>Urban C, 2010 [69]</b>                      |                 |                                                  |                                                 |                                                               |                                                                                                                                                                                   |
| DOR/RIF                                        | 40 (2/5)        | 20 (1/5)                                         | 20 (1/5)                                        | 0 (0/5)                                                       | TKA conducted at 1/4 x MIC. Synergy at: 2/8 and 4/8 mg/L                                                                                                                          |
| <b>Yuan Z, 2010 [70] and Lim TP, 2008 [71]</b> |                 |                                                  |                                                 |                                                               |                                                                                                                                                                                   |
| AMK/LVX                                        | 0 (0/1)         | NA                                               | NA                                              | NA                                                            |                                                                                                                                                                                   |
| AMK/FEP                                        | 100 (1/1)       | 0 (0/1)                                          | 100 (1/1)                                       |                                                               | Synergy was defined based on the interactive index method. Based on the available graphs it seems that >2 log CFU/ml reduction were only observed at concentrations > breakpoints |
| FEP/LVX                                        | 100 (1/1)       | 0 (0/1)                                          | 100 (1/1)                                       |                                                               |                                                                                                                                                                                   |
| <b>Lim TP, 2009 [72]</b>                       |                 |                                                  |                                                 |                                                               |                                                                                                                                                                                   |
| MEM/RIF                                        | 100 (2/2)       | 0 (0/2)                                          | 100 (2/2)                                       | 0 (0/2)                                                       | Synergy at 64/2 mg/L                                                                                                                                                              |
| TGC/MEM                                        | 0 (0/1)         | NA                                               | NA                                              | NA                                                            | No synergy at 2/64 mg/L                                                                                                                                                           |

| Study-combinations           | Synergy % (n/N) | Synergy at concenstrations ≤ breakpoints % (n/N) | Synergy at concentrations > breakpoints % (n/N) | Synergy but unclear if at concentration ≤ breakpoints % (n/N) | Concentrations at which synergy was evaluated                                                                                                                   |
|------------------------------|-----------------|--------------------------------------------------|-------------------------------------------------|---------------------------------------------------------------|-----------------------------------------------------------------------------------------------------------------------------------------------------------------|
| TGC/RIF                      | 100 (1/1)       | 100 (1/1)                                        | 0 (0/1)                                         | 0 (0/1)                                                       | Synergy at 2/2 mg/L                                                                                                                                             |
| <b>Principe L, 2009 [73]</b> |                 |                                                  |                                                 |                                                               |                                                                                                                                                                 |
| TGC/LVX                      | 0 (0/2)         | NA                                               | NA                                              | NA                                                            | Regrowth in TKA at 0.25/4 mg/L                                                                                                                                  |
| TGC/AMK                      | 100 (1/1)       | 100 (1/1)                                        | 0 (0/1)                                         | 0 (0/1)                                                       | Synergy in TKA at 1/64 mg/L                                                                                                                                     |
| TGC/IMP                      | 0 (0/1)         | NA                                               | NA                                              | NA                                                            | Regrowth in TKA at 0.25/8 mg/L                                                                                                                                  |
| <b>Lee CH, 2008 [75]</b>     |                 |                                                  |                                                 |                                                               |                                                                                                                                                                 |
| SUL/MEM                      | 50 (1/2)        | 0 (0/2)                                          | 50 (1/2)                                        | 0 (0/2)                                                       | TKA conducted only at 1xMIC. Synergy at 16/64 mg/L                                                                                                              |
| <b>Lee NY, 2007 [76]</b>     |                 |                                                  |                                                 |                                                               |                                                                                                                                                                 |
| SUL/IMP                      | 0 (0/4)         | NA                                               | NA                                              | NA                                                            | Although only partial synergy (FICIs 0.56-0.75) is reported in checkerboard the combination MIC in agar dilution were ≤ breakpoints; 8/0.5, 8/2, 8/2, 8/2 mg/L. |
| SUL/MEM                      | 0 (0/4)         | NA                                               | NA                                              | NA                                                            | Although only partial synergy (FICIs 0.56-0.75) is reported in checkerboard the combination MIC in agar dilution were ≤ breakpointss; 8/1, 8/4, 8/4, 8/4 mg/L.  |
| <b>Choi JY, 2004 [79]</b>    |                 |                                                  |                                                 |                                                               |                                                                                                                                                                 |
| SUL/IMP                      | 100 (1/1)       | 0 (0/1)                                          | 100 (1/1)                                       | 0 (0/1)                                                       | TKA conducted at 0.5x and 1x MIC. Synergy at 32/8 mg/L                                                                                                          |
| <b>Jung R, 2004 [80]</b>     |                 |                                                  |                                                 |                                                               |                                                                                                                                                                 |
| FEP/MXF                      | 100 (2/2)       | 0 (0/2)                                          | 100 (2/2)                                       | 0 (0/2)                                                       | TKA conducted at 0.5x and 1x MIC. Synergy at 32/8 and 32/4 mg/L.                                                                                                |
| <b>Montero A, 2004 [81]</b>  |                 |                                                  |                                                 |                                                               |                                                                                                                                                                 |

| Study-combinations                    | Synergy % (n/N) | Synergy at concenstrations ≤ breakpoints % (n/N) | Synergy at concentrations > breakpoints % (n/N) | Synergy but unclear if at concentration ≤ breakpoints % (n/N) | Concentrations at which synergy was evaluated                                                                                                                                                                                                                                                                                              |
|---------------------------------------|-----------------|--------------------------------------------------|-------------------------------------------------|---------------------------------------------------------------|--------------------------------------------------------------------------------------------------------------------------------------------------------------------------------------------------------------------------------------------------------------------------------------------------------------------------------------------|
| IMP/RIF                               | 100 (2/2)       | 0 (0/2)                                          | 100 (2/2)                                       | 0 (0/2)                                                       | TKA conducted at 1/2 to 1/32 x MIC. Synergy at 2/4 mg/L (strain D) and 32/2mg/L (Strain E). Strain D: No differences compared to monotherapy in the mouse model. Strain E: Significantly reduced lung bacterial counts, no significant reduction of bacteraemia, similar survival (100% with the combination + 100% with RIF monotherapy). |
| IMP/SUL                               | 0 (0/1)         | NA                                               | NA                                              | NA                                                            | TKA conducted at 1/2 to 1/32 x MIC. No synergy in TKA. Not evaluated in the animal model.                                                                                                                                                                                                                                                  |
| <b>Yoon J, 2004 [82]</b>              |                 |                                                  |                                                 |                                                               |                                                                                                                                                                                                                                                                                                                                            |
| PMB/IMP                               | 100 (1/1)       | 0 (0/1)                                          | 100 (1/1)                                       | 0 (0/1)                                                       | Synergy at 2/8 mg/L                                                                                                                                                                                                                                                                                                                        |
| <b>Roussel-Delvallez M, 1996 [84]</b> |                 |                                                  |                                                 |                                                               |                                                                                                                                                                                                                                                                                                                                            |
| IMP/SUL/AMK                           | 0 (0/8)         | NA                                               | NA                                              | NA                                                            | TKA was conducted at following concentrations: TIM 112 mg/L, TZP 100 mg/L, IMP 25 mg/L, AMK 15 mg/L. Only mean killing is reported. Initial bactericidal killing was observed with some combinations-strains but "regrowth was observed for all strains at 24 hours".                                                                      |
| IMP/TIM/AMK                           | 0 (0/8)         | NA                                               | NA                                              | NA                                                            |                                                                                                                                                                                                                                                                                                                                            |
| TZP/SUL/AMK                           | 0 (0/8)         | NA                                               | NA                                              | NA                                                            |                                                                                                                                                                                                                                                                                                                                            |
| TZP/TIM/AMK                           | 0 (0/8)         | NA                                               | NA                                              | NA                                                            |                                                                                                                                                                                                                                                                                                                                            |

#### 4.6 Proportion of synergy and assessment of clinical relevance of observed synergy in studies using dynamic in vitro PK/PD models (study level data)

| Study-combinations                             | Method                             | Synergy % (n/N) | Comments                                                                                                                                                               |
|------------------------------------------------|------------------------------------|-----------------|------------------------------------------------------------------------------------------------------------------------------------------------------------------------|
| <b>Lenhard JR, 2017 [27,28]</b>                |                                    |                 |                                                                                                                                                                        |
| PMB/MEM                                        | HFIM                               | 0 (0/1)         | Doses simulating human regimens were used (PMB 3.33mg/kg then 1.43mg/kg every 12 hours, MEM 2gr every 8 hour as 3h-infusions, SAM 8/4g every 8 hours as 3h-infusions). |
| PMB/SAM                                        |                                    | 0 (0/1)         |                                                                                                                                                                        |
| MEM/SAM                                        |                                    | 0 (0/1)         |                                                                                                                                                                        |
| PMB/MEM/SAM                                    |                                    | 100 (1/1)       |                                                                                                                                                                        |
| <b>Yuan Z, 2010 [70] and Lim TP, 2008 [71]</b> |                                    |                 |                                                                                                                                                                        |
| AMK/LVX                                        | HFIM                               | 0 (0/1)         | Regrowth despite initial killing at 4 hours.                                                                                                                           |
| AMK/FEP                                        |                                    | 0 (0/1)         | Regrowth despite initial killing at 4 hours.                                                                                                                           |
| <b>Córdoba J, 2015 [41]</b>                    |                                    |                 |                                                                                                                                                                        |
| CST/IMP                                        | Other dynamic in vitro PK/PD model | 0 (0/1)         | Simulation of human treatment regimens                                                                                                                                 |
| CST/DAP                                        |                                    | 100 (1/1)       |                                                                                                                                                                        |
| IMP/ETP                                        |                                    | 0 (0/3)         |                                                                                                                                                                        |
| RIF/CFS                                        |                                    | 0 (0/7)         |                                                                                                                                                                        |
| <b>Housman ST, 2013 [54]</b>                   |                                    |                 | Simulated regimens: SAM 9g q8h (3h inf), DOR 2gr q8h (4h inf), TGC 200mg q12h (0.5h inf).                                                                              |
| TGC/DOR                                        | Other dynamic in vitro PK/PD model | 0 (0/2)         | No synergy.                                                                                                                                                            |
| SAM/DOR                                        |                                    | 0 (0/3)         | Increased killing with SAM/DOR vs monotherapies against all 3 strains but with regrowth by 24 hours.                                                                   |
| SAM/TGC                                        |                                    | 0 (0/1)         | No synergy.                                                                                                                                                            |
| <b>Lee HJ, 2013 [55]</b>                       |                                    |                 |                                                                                                                                                                        |
| CST/RIF                                        | Other dynamic in vitro PK/PD model | 100 (1/1)       | Regimens mimicking human serum concentration after usual doses in critically-ill patients.                                                                             |

#### 4.7 Proportion of synergy and assessment of clinical relevance of observed synergy in studies using animal models (study level data)

| Study-combinations                                            | Method                                                 | Outcomes assessed                                    | Synergy % (n/N) | Comments                                                                                                                                                                                                                                              |
|---------------------------------------------------------------|--------------------------------------------------------|------------------------------------------------------|-----------------|-------------------------------------------------------------------------------------------------------------------------------------------------------------------------------------------------------------------------------------------------------|
| <b>Cebrero-Cangueiro T, 2021 [1] and Nordmann P, 2020 [2]</b> |                                                        |                                                      |                 |                                                                                                                                                                                                                                                       |
| MEM/IMP                                                       | Intraperitoneal infection mouse model                  | Survival, sterilization of cultures, bacterial loads | 0 (0/2)         | Decreased bacterial loads with combination vs monotherapy. But similar mortality and bacterial clearance comparing meropenem monotherapy to combination therapy.                                                                                      |
| <b>Poulakou G, 2019 [21]</b>                                  |                                                        |                                                      |                 |                                                                                                                                                                                                                                                       |
| CST/DAP                                                       | Intraperitoneal infection mouse model                  | Survival and bacterial loads                         | 100 (1/1)       | The combination significantly improved survival and reduced bacterial loads in tissues compared to monotherapies.                                                                                                                                     |
| <b>Wei W, 2017 [30]</b>                                       |                                                        |                                                      |                 |                                                                                                                                                                                                                                                       |
| CST/LVX                                                       | <i>G. mellonella</i> model                             | Survival                                             | 0 (0/1)         | Same survival comparing combination therapy to monotherapy                                                                                                                                                                                            |
| <b>Yang H, 2016 [38]</b>                                      |                                                        |                                                      |                 |                                                                                                                                                                                                                                                       |
| CST/VAN                                                       | <i>G. mellonella</i> model                             | Survival                                             | 100 (1/1)       | Survival rate in <i>G. mellonella</i> model higher than monotherapies, but high survival even with monotherapies.                                                                                                                                     |
| <b>O'Hara JA, 2013 [56]</b>                                   |                                                        |                                                      |                 |                                                                                                                                                                                                                                                       |
| CST/DOR                                                       | <i>G. mellonella</i> model (simulation of human doses) | Survival                                             | 0 (0/3)         | No synergy                                                                                                                                                                                                                                            |
| CST/VAN                                                       |                                                        |                                                      | 0 (0/3)         |                                                                                                                                                                                                                                                       |
| DOR/VAN                                                       |                                                        |                                                      | 100 (3/3)       | The clinical relevance of the <i>G. mellonella</i> model is unclear because of mechanisms of action likely not relevant to humans; high survival even with DOR and VAN monotherapies, and high survival with DOR/VAN despite lack of in vitro synergy |
| CST/VAN/DOR                                                   |                                                        |                                                      | 100 (3/3)       |                                                                                                                                                                                                                                                       |
| <b>Queenan AM, 2013 [58]</b>                                  |                                                        |                                                      |                 |                                                                                                                                                                                                                                                       |

| Study-combinations                             | Method                                | Outcomes assessed                                    | Synergy % (n/N) | Comments                                                                                                                                                                                                                                                      |
|------------------------------------------------|---------------------------------------|------------------------------------------------------|-----------------|---------------------------------------------------------------------------------------------------------------------------------------------------------------------------------------------------------------------------------------------------------------|
| DOR/CIP                                        | intraperitoneal infection mouse model | Survival                                             | 0 (0/1)         | No synergy                                                                                                                                                                                                                                                    |
| DOR/LVX                                        |                                       |                                                      | 100 (1/1)       | Improved survival in the mouse model (the isolate had relatively low MICs: DOR 16 mg/L and LVX 8 mg/L).                                                                                                                                                       |
| <b>Pachón-Ibáñez ME, 2011 [63]</b>             |                                       |                                                      |                 |                                                                                                                                                                                                                                                               |
| RIF/IMP                                        | Pneumonia mouse model                 | Survival, sterilization of cultures, bacterial loads | 0 (0/2)         | In the animal model survival with RIF/IMP (80 and 33%) and RIF/SUL (60 and 53%) did not differ significantly compared to RIF monotherapy (73 and 40%). Lung clearance and blood culture sterilization was higher against one of the two strains with RIF/SUL. |
| RIF/SUL                                        |                                       |                                                      | 50 (1/2)        |                                                                                                                                                                                                                                                               |
| <b>Pachón-Ibáñez ME, 2010 [66]</b>             |                                       |                                                      |                 |                                                                                                                                                                                                                                                               |
| SUL/IMP                                        | Pneumonia and meningitis mouse models | Survival, sterilization of cultures, bacterial loads | 100 (1/1)       | Higher survival and bacterial clearance in animal model compared to monotherapies.                                                                                                                                                                            |
| RIF/IMP                                        |                                       |                                                      | 0 (0/1)         | Survival not improved comparing RIF monotherapy (71%) to combination therapy (60%), despite improved bacterial clearance.                                                                                                                                     |
| RIF/SUL                                        |                                       |                                                      | 0 (0/1)         | Survival not improved comparing RIF monotherapy (71%) to combination therapy (47%), despite improved bacterial clearance.                                                                                                                                     |
| <b>Yuan Z, 2010 [70] and Lim TP, 2008 [71]</b> |                                       |                                                      |                 |                                                                                                                                                                                                                                                               |
| AMK/LVX                                        | Pneumonia mouse model                 | Survival, bacterial loads                            | 0 (0/1)         | Similar survival with AMK monotherapy.                                                                                                                                                                                                                        |
| AMK/FEP                                        |                                       |                                                      | 1 (1/1)         | Improved survival and reduction of tissue bacterial burden in the mouse model.                                                                                                                                                                                |
| FEP/LVX                                        |                                       |                                                      | 0 (0/1)         | Similar survival with FEP monotherapy.                                                                                                                                                                                                                        |
| <b>Song YC, 2009 [74]</b>                      |                                       |                                                      |                 |                                                                                                                                                                                                                                                               |
| IMP/RIF                                        | Pneumonia mouse model                 | Survival, sterilization of cultures,                 | 100 (3/3)       | Synergistic ( $\geq 2\Delta$ log reduction in lung bacterial loads compared to RIF monotherapy) against all 3 strains, but                                                                                                                                    |

| Study-combinations          | Method                | Outcomes assessed                                    | Synergy % (n/N) | Comments                                                                                                                                                                                                                                          |
|-----------------------------|-----------------------|------------------------------------------------------|-----------------|---------------------------------------------------------------------------------------------------------------------------------------------------------------------------------------------------------------------------------------------------|
|                             |                       | bacterial loads                                      |                 | 100% survival with both monotherapy and combination.                                                                                                                                                                                              |
| RIF/AMK                     |                       |                                                      | 0 (0/1)         | Not better than monotherapy                                                                                                                                                                                                                       |
| IMP/AMK                     |                       |                                                      | 0 (0/1)         | Not better than monotherapy                                                                                                                                                                                                                       |
| <b>Montero A, 2004 [81]</b> |                       |                                                      |                 |                                                                                                                                                                                                                                                   |
| IMP/RIF                     | Mouse pneumonia model | Survival, sterilization of cultures, bacterial loads | 50 (1/2)        | Strain D: No differences compared to monotherapy in the mouse model.<br>Strain E: Significantly reduced lung bacterial counts, no significant reduction of bacteraemia, similar survival (100% with the combination + 100% with RIF monotherapy). |

#### 4.8 Proportion of synergy and assessment of clinical relevance of observed synergy in other methods (study level data)

| Study-combinations                   | Method                    | Synergy % (n/N) | Synergy at concentrations $\leq$ breakpoints % (n/N) | Synergy at concentrations $>$ breakpoints % (n/N) | Synergy but unclear if at concentration $\leq$ breakpoints % (n/N) | Concentrations at which synergy was evaluated                                                                         |
|--------------------------------------|---------------------------|-----------------|------------------------------------------------------|---------------------------------------------------|--------------------------------------------------------------------|-----------------------------------------------------------------------------------------------------------------------|
| <b>Limsrivanichakorn S, 2020 [7]</b> |                           |                 |                                                      |                                                   |                                                                    |                                                                                                                       |
| CFS/MXF                              | E-test fixed ratio method | 2.5 (2/80)      | 0 (0/80)                                             | 0 (0/80)                                          | 2.5 (2/80)                                                         | Unclear at which concentration synergy was present                                                                    |
| <b>Rodriguez CH, 2020 [11]</b>       |                           |                 |                                                      |                                                   |                                                                    |                                                                                                                       |
| SUL/AVI                              | Agar dilution             | 92 (35/38)      | 92 (35/38)                                           | 0 (0/38)                                          | 0 (0/38)                                                           | Avibactam at a fixed concentration of 4mg/L reduced the MIC of SUL to $\leq$ 4mg/L in 35 of the 38 eligible isolates. |
| <b>Gaudereto JJ, 2019 [12]</b>       |                           |                 |                                                      |                                                   |                                                                    |                                                                                                                       |
| CZA/MEM                              | DDST                      | 1.8 (2/11)      | 0 (0/11)                                             | 0 (0/11)                                          | 1.8 (2/11)                                                         |                                                                                                                       |
| <b>Shinohara DR, 2019 [22]</b>       |                           |                 |                                                      |                                                   |                                                                    |                                                                                                                       |
| PMB/VAN                              | Agar/disk                 | 100 (3/3)       | 100 (3/3)                                            | 0 (0/3)                                           | 0 (0/3)                                                            | Agar containing CST at 0.5 x MIC (8, 8 and 4 mg/L)                                                                    |
| PMB/VAN                              | Agar/gradient             | 100 (3/3)       | 100 (3/3)                                            | 0 (0/3)                                           | 0 (0/3)                                                            |                                                                                                                       |
| <b>Madadi-Goli N, 2017 [29]</b>      |                           |                 |                                                      |                                                   |                                                                    |                                                                                                                       |
| TGC/LVX                              | Fixed-ratio E-test method | 0 (0/7)         | NA                                                   | NA                                                | NA                                                                 | No synergy                                                                                                            |
| SAM/LVX                              |                           | 100 (7/7)       | 71 (5/7)                                             | 29 (2/7)                                          | 0 (0/7)                                                            | Combination MICs: 3/3, 4/4, 4/4, 4/4, 4/4, 6/6, 6/6 mg/L                                                              |

| Study-combinations      | Method | Synergy % (n/N) | Synergy at concentrations ≤ breakpoints % (n/N) | Synergy at concentrations > breakpoints % (n/N) | Synergy but unclear if at concentration ≤ breakpoints % (n/N) | Concentrations at which synergy was evaluated                                                                                                                                                                                                                                              |
|-------------------------|--------|-----------------|-------------------------------------------------|-------------------------------------------------|---------------------------------------------------------------|--------------------------------------------------------------------------------------------------------------------------------------------------------------------------------------------------------------------------------------------------------------------------------------------|
| SAM/TGC                 |        | 0 (0/7)         | NA                                              | NA                                              | NA                                                            | No synergy                                                                                                                                                                                                                                                                                 |
| <b>Bae S, 2016 [32]</b> |        |                 |                                                 |                                                 |                                                               | MCBT conducted at concentrations equal to the breakpoints of resistance; concentrations: CST at 2 mg/L, SAM at 16/8 mg/L, AMK at 16 mg/L, AZM at 4 mg/L, ATM at 16 mg/L, CAZ at 16 mg/L, MEM at 8 mg/L, RIF at 2 mg/L, TGC at 2 mg/L, SXT at 4/76 mg/L, VAN at 4 mg/L, and TEC at 16 mg/L. |
| SAM/RIF                 | MCBT   | 13 (1/8)        | 13 (1/8)                                        | 0 (0/8)                                         | 0 (0/8)                                                       |                                                                                                                                                                                                                                                                                            |
| SAM/SXT                 |        | 14 (1/7)        | 14 (1/7)                                        | 0 (0/7)                                         | 0 (0/7)                                                       |                                                                                                                                                                                                                                                                                            |
| SAM/TEC                 |        | 13 (1/8)        | 13 (1/8)                                        | 0 (0/8)                                         | 0 (0/8)                                                       |                                                                                                                                                                                                                                                                                            |
| AMK/CAZ                 |        | 17 (1/6)        | 17 (1/6)                                        | 0 (0/6)                                         | 0 (0/6)                                                       |                                                                                                                                                                                                                                                                                            |
| AMK/SXT                 |        | 17 (1/6)        | 17 (1/6)                                        | 0 (0/6)                                         | 0 (0/6)                                                       |                                                                                                                                                                                                                                                                                            |
| AZM/CAZ                 |        | 13 (1/8)        | 13 (1/8)                                        | 0 (0/8)                                         | 0 (0/8)                                                       |                                                                                                                                                                                                                                                                                            |
| AZM/SXT                 |        | 17 (1/6)        | 17 (1/6)                                        | 0 (0/6)                                         | 0 (0/6)                                                       |                                                                                                                                                                                                                                                                                            |
| AZM/TEC                 |        | 13 (1/8)        | 13 (1/8)                                        | 0 (0/8)                                         | 0 (0/8)                                                       |                                                                                                                                                                                                                                                                                            |
| ATM/CAZ                 |        | 11 (1/9)        | 11 (1/9)                                        | 0 (0/9)                                         | 0 (0/9)                                                       |                                                                                                                                                                                                                                                                                            |
| ATM/SXT                 |        | 14 (1/7)        | 14 (1/7)                                        | 0 (0/7)                                         | 0 (0/7)                                                       |                                                                                                                                                                                                                                                                                            |
| ATM/TEC                 |        | 11 (1/9)        | 11 (1/9)                                        | 0 (0/9)                                         | 0 (0/9)                                                       |                                                                                                                                                                                                                                                                                            |
| CAZ/MEM                 |        | 11 (1/9)        | 11 (1/9)                                        | 0 (0/9)                                         | 0 (0/9)                                                       |                                                                                                                                                                                                                                                                                            |
| CAZ/RIF                 |        | 11 (1/9)        | 11 (1/9)                                        | 0 (0/9)                                         | 0 (0/9)                                                       |                                                                                                                                                                                                                                                                                            |
| CAZ/TGC                 |        | 11 (1/9)        | 11 (1/9)                                        | 0 (0/9)                                         | 0 (0/9)                                                       |                                                                                                                                                                                                                                                                                            |
| CAZ/SXT                 |        | 14 (1/7)        | 14 (1/7)                                        | 0 (0/7)                                         | 0 (0/7)                                                       |                                                                                                                                                                                                                                                                                            |
| CAZ/VAN                 |        | 11 (1/9)        | 11 (1/9)                                        | 0 (0/9)                                         | 0 (0/9)                                                       |                                                                                                                                                                                                                                                                                            |
| MEM/RIF                 |        | 11 (1/9)        | 11 (1/9)                                        | 0 (0/9)                                         | 0 (0/9)                                                       |                                                                                                                                                                                                                                                                                            |
| MEM/SXT                 |        | 14 (1/7)        | 14 (1/7)                                        | 0 (0/7)                                         | 0 (0/7)                                                       |                                                                                                                                                                                                                                                                                            |
| MEM/TEC                 |        | 11 (1/9)        | 11 (1/9)                                        | 0 (0/9)                                         | 0 (0/9)                                                       |                                                                                                                                                                                                                                                                                            |
| RIF/SXT                 |        | 14 (1/7)        | 14 (1/7)                                        | 0 (0/7)                                         | 0 (0/7)                                                       |                                                                                                                                                                                                                                                                                            |
| SXT/VAN                 |        | 14 (1/7)        | 14 (1/7)                                        | 0 (0/7)                                         | 0 (0/7)                                                       |                                                                                                                                                                                                                                                                                            |
| AMK/RIF                 |        | 33 (2/6)        | 33 (2/6)                                        | 0 (0/6)                                         | 0 (0/6)                                                       |                                                                                                                                                                                                                                                                                            |

| Study-combinations         | Method                    | Synergy % (n/N) | Synergy at concentrations ≤ breakpoints % (n/N) | Synergy at concentrations > breakpoints % (n/N) | Synergy but unclear if at concentration ≤ breakpoints % (n/N) | Concentrations at which synergy was evaluated                                                                                                            |
|----------------------------|---------------------------|-----------------|-------------------------------------------------|-------------------------------------------------|---------------------------------------------------------------|----------------------------------------------------------------------------------------------------------------------------------------------------------|
| CAZ/TEC                    |                           | 22 (2/9)        | 22 (2/9)                                        | 0 (0/9)                                         | 0 (0/9)                                                       |                                                                                                                                                          |
| CST/RIF                    |                           | 100 (9/9)       | 100 (9/9)                                       | 0 (0/9)                                         | 0 (0/9)                                                       |                                                                                                                                                          |
| CST/TEC                    |                           | 100 (9/9)       | 100 (9/9)                                       | 0 (0/9)                                         | 0 (0/9)                                                       |                                                                                                                                                          |
| CST/VAN                    |                           | 89 (9/9)        | 89 (9/9)                                        | 0 (0/9)                                         | 0 (0/9)                                                       |                                                                                                                                                          |
| CST/MEM                    |                           | 89 (9/9)        | 89 (9/9)                                        | 0 (0/9)                                         | 0 (0/9)                                                       |                                                                                                                                                          |
| CST/ATM                    |                           | 89 (9/9)        | 89 (9/9)                                        | 0 (0/9)                                         | 0 (0/9)                                                       |                                                                                                                                                          |
| CST/CAZ                    |                           | 67 (6/9)        | 67 (6/9)                                        | 0 (0/9)                                         | 0 (0/9)                                                       |                                                                                                                                                          |
| CST/SAM                    |                           | 63 (5/8)        | 63 (5/8)                                        | 0 (0/8)                                         | 0 (0/8)                                                       |                                                                                                                                                          |
| CST/SXT                    |                           | 38 (3/8)        | 38 (3/8)                                        | 0 (0/8)                                         | 0 (0/8)                                                       |                                                                                                                                                          |
| CST/AMK                    |                           | 67 (4/7)        | 67 (4/7)                                        | 0 (0/7)                                         | 0 (0/7)                                                       |                                                                                                                                                          |
| CST/AZM                    |                           | 50 (4/8)        | 50 (4/8)                                        | 0 (0/8)                                         | 0 (0/8)                                                       |                                                                                                                                                          |
| CST/TGC                    |                           | 0 (0/9)         | NA                                              | NA                                              | NA                                                            |                                                                                                                                                          |
| <b>Hong DJ, 2016 [34]</b>  |                           |                 |                                                 |                                                 |                                                               |                                                                                                                                                          |
| CST/MEM                    | Fixed-ratio E-test method | 85 (35/41)      | 5 (2/41)                                        | 0 (0/41)                                        | 81 (33/41)                                                    | Based on reported MICs and FICIs ≤ 0.5 it was possible to confirm synergy at concentrations ≤ breakpoints in only 2 cases (with the CST/MEM combination) |
| CST/IMP                    |                           | 46 (19/41)      | 0 (0/41)                                        | 0 (0/41)                                        | 46 (19/41)                                                    |                                                                                                                                                          |
| CST/RIF                    |                           | 81 (33/41)      | 0 (0/41)                                        | 0 (0/41)                                        | 81 (33/41)                                                    |                                                                                                                                                          |
| <b>Yavaş S, 2016 [40]</b>  |                           |                 |                                                 |                                                 |                                                               |                                                                                                                                                          |
| SUL/MEM                    | Fixed-ratio E-test method | 14 (1/7)        | 0 (0/7)                                         | 0 (0/7)                                         | 14 (1/7)                                                      | FICI=0.5 but MICs not reported for the specific isolate                                                                                                  |
| <b>Marie MA, 2015 [43]</b> |                           |                 |                                                 |                                                 |                                                               |                                                                                                                                                          |

| Study-combinations         | Method              | Synergy % (n/N) | Synergy at concentrations ≤ breakpoints % (n/N) | Synergy at concentrations > breakpoints % (n/N) | Synergy but unclear if at concentration ≤ breakpoints % (n/N) | Concentrations at which synergy was evaluated                                                                                         |
|----------------------------|---------------------|-----------------|-------------------------------------------------|-------------------------------------------------|---------------------------------------------------------------|---------------------------------------------------------------------------------------------------------------------------------------|
| SUL/MEM                    | E-test/agar method  | 41 (22/54)      | 0 (0/54)                                        | 0 (0/54)                                        | 41 (22/54)                                                    | Exact FICIs or combination MICs not reported. Agar contained SUL or TZB at ½ x MIC.                                                   |
| MEM/TZB                    |                     | 35 (19/54)      | 0 (0/54)                                        | 0 (0/54)                                        | 35 (19/54)                                                    |                                                                                                                                       |
| <b>Phee LM, 2015 [19]</b>  |                     |                 |                                                 |                                                 |                                                               |                                                                                                                                       |
| CST/FA                     | Disk/agar method    | 100 (3/3)       | 0 (0/3)                                         | 100 (3/3)                                       | 0 (0/3)                                                       | Agar containing CST at 0.5 xMIC i.e. 256 (FA zone diameter 21.5mm), 2 (FA zone diameter 16mm) and 256 mg/L (FA zone diameter 21.5mm). |
| <b>Galani I, 2014 [46]</b> |                     |                 |                                                 |                                                 |                                                               |                                                                                                                                       |
| CST/DAP                    | E-test/agar method  | 0 (0/4)         | NA                                              | NA                                              | NA                                                            | Daptomycin MIC determined by E-test in agar containing CST at 0.25 and 0.5 x MIC.                                                     |
| <b>Nastro M, 2014 [48]</b> |                     |                 |                                                 |                                                 |                                                               |                                                                                                                                       |
| CST/RIF                    | E-test/agar method  | 100 (4/4)       | 0 (0/4)                                         | 100 (4/4)                                       | 0 (0/4)                                                       | CST MIC determined by E-test in agar containing RIF at 4 mg/L.                                                                        |
| <b>Wang Y, 2014 [52]</b>   |                     |                 |                                                 |                                                 |                                                               |                                                                                                                                       |
| IMP/RIF                    | double-disk synergy | 100 (1/1)       | 0 (0/1)                                         | 100 (1/1)                                       | 0 (0/1)                                                       | The sizes of the inhibition zones increased to 13.6 mm when 4 ml/L imipenem (6.2 mm) was combined with 4 mg/L of rifampicin (9.0 mm)  |
| <b>Cetin ES, 2013 [53]</b> |                     |                 |                                                 |                                                 |                                                               |                                                                                                                                       |
| RIF/SAM                    | Perpendicular       | 0 (0/7)         | NA                                              | NA                                              | NA                                                            | No synergy                                                                                                                            |
| RIF/CFS                    | E-test method       | 0 (0/7)         | NA                                              | NA                                              | NA                                                            |                                                                                                                                       |

| Study-combinations            | Method                      | Synergy % (n/N) | Synergy at concentrations ≤ breakpoints % (n/N) | Synergy at concentrations > breakpoints % (n/N) | Synergy but unclear if at concentration ≤ breakpoints % (n/N) | Concentrations at which synergy was evaluated                                                                                |
|-------------------------------|-----------------------------|-----------------|-------------------------------------------------|-------------------------------------------------|---------------------------------------------------------------|------------------------------------------------------------------------------------------------------------------------------|
| <b>Tan TY, 2011 [64]</b>      |                             |                 |                                                 |                                                 |                                                               |                                                                                                                              |
| PMB/TGC                       | Perpendicular E-test method | 0 (0/4)         | NA                                              | NA                                              | NA                                                            | No synergy                                                                                                                   |
| PMB/RIF                       |                             | 33 (1/3)        | 0 (0/3)                                         | 0 (0/3)                                         | 33 (1/3)                                                      | Clinical relevance with the perpendicular E-test method difficult to judge (not possible to estimate exact combination MICs) |
| TGC/RIF                       |                             | 33 (1/3)        | 0 (0/3)                                         | 0 (0/3)                                         | 33 (1/3)                                                      |                                                                                                                              |
| <b>Kiratisin P, 2010 [65]</b> |                             |                 |                                                 |                                                 |                                                               |                                                                                                                              |
| CFS/DOR                       | Perpendicular E-test method | 21 (4/19)       | 0 (0/19)                                        | 0 (0/19)                                        | 21 (4/19)                                                     | Clinical relevance with the perpendicular E-test method difficult to judge (not possible to estimate exact combination MICs) |
| DOR/DOX                       |                             | 0 (0/21)        | NA                                              | NA                                              | NA                                                            |                                                                                                                              |
| DOR/RIF                       |                             | 0 (0/17)        | NA                                              | NA                                              | NA                                                            |                                                                                                                              |
| DOR/NET                       |                             | 0 (0/21)        | NA                                              | NA                                              | NA                                                            |                                                                                                                              |
| DOR/MXF                       |                             | 0 (0/21)        | NA                                              | NA                                              | NA                                                            |                                                                                                                              |
| CFS/IMP                       |                             | 47 (9/19)       | 0 (0/19)                                        | 0 (0/19)                                        | 47 (9/19)                                                     |                                                                                                                              |
| IMP/DOX                       |                             | 0 (0/21)        | NA                                              | NA                                              | NA                                                            |                                                                                                                              |
| IMP/RIF                       |                             | 0 (0/17)        | NA                                              | NA                                              | NA                                                            |                                                                                                                              |
| IMP/NET                       |                             | 0 (0/21)        | NA                                              | NA                                              | NA                                                            |                                                                                                                              |
| IMP/MXF                       |                             | 5 (1/21)        | 0 (0/21)                                        | 0 (0/21)                                        | 5 (1/21)                                                      |                                                                                                                              |
| CFS/MEM                       |                             | 53 (10/19)      | 0 (0/19)                                        | 0 (0/19)                                        | 53 (10/19)                                                    |                                                                                                                              |
| MEM/DOX                       |                             | 0 (0/21)        | NA                                              | NA                                              | NA                                                            |                                                                                                                              |
| MEM/RIF                       |                             | 0 (0/17)        | NA                                              | NA                                              | NA                                                            |                                                                                                                              |
| MEM/NET                       |                             | 0 (0/21)        | NA                                              | NA                                              | NA                                                            |                                                                                                                              |
| MEM/MXF                       |                             | 0 (0/21)        | NA                                              | NA                                              | NA                                                            |                                                                                                                              |

| Study-combinations | Method        | Synergy % (n/N) | Synergy at concentrations ≤ breakpoints % (n/N) | Synergy at concentrations > breakpoints % (n/N) | Synergy but unclear if at concentration ≤ breakpoints % (n/N) | Concentrations at which synergy was evaluated |
|--------------------|---------------|-----------------|-------------------------------------------------|-------------------------------------------------|---------------------------------------------------------------|-----------------------------------------------|
| Lee NY, 2007 [76]  |               |                 |                                                 |                                                 |                                                               |                                               |
| SUL/IMP            | Agar dilution | 100 (4/4)       | 100 (4/4)                                       | 0 (0/4)                                         | 0 (0/4)                                                       | Combined MIC: 8/0.5, 8/2, 8/2, 8/2 mg/L       |
| SUL/MEM            |               | 100 (4/4)       | 100 (4/4)                                       | 0 (0/4)                                         | 0 (0/4)                                                       | Combined MIC: 8/1, 8/4, 8/4, 8/4 mg/L         |

## 5 Explanations for articles excluded as irrelevant

Following a reviewer's suggestion, reasons for retrieval of irrelevant articles by the search strategy used are discussed here.

Specifically, the search terms (synerg\* [ti] OR combin\* [ti] OR "Drug Combinations"[Mesh] OR "Drug Synergism"[Mesh] OR "Drug Therapy, Combination"[Mesh]), resulted in retrieval of the following types of non-relevant articles:

- 1) Irrelevant articles containing the term "synerg\*" in the title, e.g.
  - a. Articles evaluating synergistic interactions between different bacterial species (e.g. PMID: 25467269)
  - b. "Synergistic effect of thermophilic temperature and biosurfactant produced by *Acinetobacter calcoaceticus* BU03 on the biodegradation of phenanthrene in bioslurry system." (PMID: 21530078)
  - c. "Distinct effector-binding sites enable synergistic transcriptional activation by BenM, a LysR-type regulator." (PMID: 17291527)
- 2) Irrelevant articles containing the term "combin\*" in the title, e.g.
  - a. "Combined microbial degradation of crude oil under alkaline conditions by *Acinetobacter baumannii* and *Talaromyces* sp." (PMID: 33485133)
  - b. "Combined Effects Of Low Incubation Temperature, Minimal Growth Medium, And Low Hydrodynamics Optimize *Acinetobacter baumannii* Biofilm Formation" (PMID: 31814741)
- 3) Articles evaluating beta-lactam/ beta-lactamase combinations (e.g. PMID: 27312582)
- 4) Articles evaluating the combination trimethoprim/sulfamethoxazole (e.g. PMID: 31427295)
- 5) Articles evaluating the effect of combination therapy on metabolomics (e.g. PMID: 33387481)
- 6) Articles evaluating the effect of combination therapy on persistence (e.g. PMID: 31818819)

## 6 List of potentially relevant non-English articles excluded

### Chinese:

- 1) Mao HB, He M, He SN. [Significance of Lipopolysaccharide Lipid A Gene Mutation of Extensively Drug-resistant *Acinetobacter baumannii* on Polymyxin Resistance and Its Influence on Treatment]. **Sichuan Da Xue Xue Bao Yi Xue Ban**. 2021 Jan;52(1):124-128. doi: 10.12182/20210160208.
- 2) Lu Y, Zhang Y, Zhou H, Yu F, Sun S, Rui Y. [Combined drug sensitivity test of 50 strains of extensively drug-resistant *Acinetobacter baumannii*]. **Nan Fang Yi Ke Da Xue Xue Bao**. 2014 Nov;34(11):1697-701.
- 3) Zhao C, Xie W, Zhang W, Ye Z, Wu H. [Mechanism of drug resistance of carbapenems-resistant *Acinetobacter baumannii* and the application of a combination of drugs in vitro]. **Zhonghua Shao Shang Za Zhi**. 2014 Apr;30(2):166-70.
- 4) Ai Y, Dou SS, Lu SJ. Study on in vitro drug sensitivity of minocycline combined with 11 antibiotics against Multidrug resistant *Acinetobacter baumannii*. **Chinese Journal of New Drugs**. 2018 - Volume 27, Issue 6, pp. 702-707
- 5) Ke Q, Lü Y, Wang F. In vitro activity of meropenem in combination with sulbactam or cefoperazone-sulbactam against multidrug resistant *acinetobacter baumannii*. **Chinese Journal of Infection and Chemotherapy**. 2015 - Volume 15, Issue 6, pp. 548-551
- 6) Bai Y, Sun Y, Wang J, Liu X, Wen K, Niu H, Cao J, Tang MJ, Wang R. In vitro antibacterial activity of colistin in combination with other antibacterials against the 73 strains of multidrug-resistant *acinetobacter baumannii*. **Chinese Pharmaceutical Journal**. 2015 - Volume 50, Issue 5, pp. 427-430
- 7) Wang TS, Su JR. Combined antimicrobial susceptibility test against pan-drug-resistant *Acinetobacter baumannii* with E-test and microdilution checkerboard assay. **Chinese Journal of Microbiology and Immunology (China)**, 2013 - Volume 33, Issue 2, pp. 144-147
- 8) Wang TS, Su JR. Different activities of antimicrobial combinations against multidrug resistant *Acinetobacter baumannii* in vitro. **Chinese Journal of Microbiology and Immunology (China)**. 2011 - Volume 31, Issue 10, pp. 898-902
- 9) Xie F, Ding YJ, Zhou SD. Effect of two antibiotics combination on multi-drug resistant *acinetobacter calcoaceticus-baumannii*. **Chinese Pharmaceutical Journal**. 2010 - Volume 45, Issue 6, pp. 476-478

### Turkish:

- 1) Akyüz S, Parlak M, Güdücüoğlu H. [In-vitro Activity of Ceftolozane-Tazobactam in Combination with Various Antibiotics Against Multidrug-resistant *Acinetobacter baumannii* Isolated from Intensive Care Patients]. **Mikrobiyol Bul**. 2020 Jan;54(1):154-162. doi: 10.5578/mb.68981.
- 2) Zarakolu P, Ayaz ÇM, Metan G. [Various antibiotic combinations against carbapenem resistant *Acinetobacter baumannii* infections and in vitro synergy test results (2002-2016)]. **Mikrobiyol Bul**. 2018 Apr;52(2):190-197. doi: 10.5578/mb.61903.

- 3) Çetinkol Y, Telli M, Altunçekiç Yıldırım A, Çalgın MK. [Evaluation of the efficacy of colistin/sulbactam combination on carbapenem-resistant *Acinetobacter baumannii* strains]. **Mikrobiyol Bul.** 2016 Jul;50(3):460-5. doi: 10.5578/mb.26289.
- 4) Turk Dagi H, Kus H, Arslan U, Tuncer I. [In vitro synergistic activity of sulbactam in combination with imipenem, meropenem and cefoperazone against carbapenem-resistant *Acinetobacter baumannii* isolates]. **Mikrobiyol Bul.** 2014 Apr;48(2):311-5. doi: 10.5578/mb.7104.
- 5) Cıkman A, Ceylan MR, Parlak M, Karahocagil MK, Berktaş M. [Evaluation of Colistin-Ampicillin/Sulbactam Combination Efficacy in Imipenem-Resistant *Acinetobacter baumannii* Strains]. **Mikrobiyol Bul.** 2013 Jan;47(1):147-51. doi: 10.5578/mb.4523.
- 6) Ozseven AG, Sesli Çetin E, Ozseven L. [Do different interpretative methods used for evaluation of checkerboard synergy test affect the results?]. **Mikrobiyol Bul.** 2012 Jul;46(3):410-20.

#### **French:**

- 1) Elkhaili H, Pompei D, Linger L, Kamili N, Monteil H, Jehl F. [Kinetics of bactericidal activity of cefepime and ceftiofime alone or combined with gentamicin, amikacin or ciprofloxacin against *Acinetobacter baumannii*, *Stenotrophomonas maltophilia* and *Enterobacter cloacae* hyperproductive in cephalosporinase]. **Pathol Biol (Paris).** 1996 May;44(5):367-73.
- 2) Hercouet H, Bousser J, Donnio PY, Avril JL. [In vitro effect of antibiotics against hospital strains of *Acinetobacter baumannii*]. **Pathol Biol (Paris).** 1989 Jun;37(5 Pt 2):612-6.
- 3) Le Noc P, Croize J, Bryskier A, Le Noc D. [In vitro antibacterial activity of ceftiofime in combination with 4 aminoglycosides and 2 fluoroquinolones]. **Pathol Biol (Paris).** 1988 Jun;36(5 Pt 2):762-7.
- 4) Berardi-Grassias L, Bigel ML, Macheboeuf F, Boisivon A, Chauvière P, Guiomar C. [In vitro study of the pefloxacin-ceftiofime combination against 18 strains of *Acinetobacter*]. **Pathol Biol (Paris).** 1986 May;34(5):436-9.
- 5) Kitzis MD, Goldstein FW, Labia R, Acar JF. [Activity of sulbactam and clavulanic acid, alone and combined, on *Acinetobacter calcoaceticus*]. **Ann Microbiol (Paris).** 1983 Mar-Apr 1983;134A(2):163-8.

#### **Korean:**

- 1) Sung H, Choi SJ, Yoo S, Kim MN. [In vitro antimicrobial synergy against imipenem-resistant *Acinetobacter baumannii*]. **Korean J Lab Med.** 2007 Apr;27(2):111-7. doi: 10.3343/kjlm.2007.27.2.111.
- 2) Hang JJ, Kim MN, Lee K, Hong SB, Lim CM, Koh Y. The comparative efficacy of colistin monotherapy and combination therapy based on in vitro antimicrobial synergy in ventilator-associated pneumonia caused by multi-drug resistant *Acinetobacter baumannii*. **Tuberculosis and Respiratory Diseases.** 2009 - Volume 67, Issue 3, pp. 212-220

## Japanese:

- 1) Deguchi K. [Investigation in vitro synergism on ampicillin with cloxacillin and dibekacin against glucose non-fermenting gram-negative bacilli and Serratia (author's transl)]. **Jpn J Antibiot.** 1978 Oct;31(10):610-3.

## 7 References

1. Cebrero-Cangueiro, T.; Nordmann, P.; Carretero-Ledesma, M.; Pachón, J.; Pachón-Ibáñez, M.E. Efficacy of dual carbapenem treatment in a murine sepsis model of infection due to carbapenemase-producing *Acinetobacter baumannii*. *J. Antimicrob. Chemother.* **2021**, *76*, 680-683, doi:10.1093/jac/dkaa487.
2. Nordmann, P.; Perler, J.; Kieffer, N.; Poirel, L. In-vitro evaluation of a dual carbapenem combination against carbapenemase-producing *Acinetobacter baumannii*. *J. Infect.* **2020**, *80*, 121-142, doi:10.1016/j.jinf.2019.10.003.
3. Cheng, J.; Yan, J.; Reyna, Z.; Slarve, M.; Lu, P.; Spellberg, B.; Luna, B. Synergistic Rifabutin and Colistin Reduce Emergence of Resistance When Treating *Acinetobacter baumannii*. *Antimicrob. Agents Chemother.* **2021**, *65*, doi:10.1128/aac.02204-20.
4. Nwabor, O.F.; Terbtthakun, P.; Voravuthikunchai, S.P.; Chusri, S. Evaluation of the Synergistic Antibacterial Effects of Fosfomycin in Combination with Selected Antibiotics against Carbapenem-Resistant *Acinetobacter baumannii*. *Pharmaceuticals* **2021**, *14*, 185.
5. Armengol, E.; Asunción, T.; Viñas, M.; Sierra, J.M. When Combined with Colistin, an Otherwise Ineffective Rifampicin-Linezolid Combination Becomes Active in *Escherichia coli*, *Pseudomonas aeruginosa*, and *Acinetobacter baumannii*. *Microorganisms* **2020**, *8*, doi:10.3390/microorganisms8010086.
6. Li, J.; Fu, Y.; Zhang, J.; Zhao, Y.; Fan, X.; Yu, L.; Wang, Y.; Zhang, X.; Li, C. The efficacy of colistin monotherapy versus combination therapy with other antimicrobials against carbapenem-resistant *Acinetobacter baumannii* ST2 isolates. *J. Chemother.* **2020**, *32*, 359-367, doi:10.1080/1120009x.2020.1764282.
7. Limsrivanichakorn, S.; Ngamskulrungroj, P.; Leelaporn, A. Activity of Antimicrobial Combinations Against Extensively Drug-Resistant *Acinetobacter baumannii* as Determined by Checkerboard Method and E-test. *Siriraj Medical Journal* **2020**, *72*, 214-218, doi:<https://doi.org/10.33192/Smj.2020.29>.
8. Mohd Sazlly Lim, S.; Naicker, S.; Ayfan, A.K.; Zowawi, H.; Roberts, J.A.; Sime, F.B. Non-polymyxin-based combinations as potential alternatives in treatment against carbapenem-resistant *Acinetobacter baumannii* infections. *Int. J. Antimicrob. Agents* **2020**, *56*, 106115, doi:10.1016/j.ijantimicag.2020.106115.
9. Mohd Sazlly Lim, S.; Heffernan, A.J.; Roberts, J.A.; Sime, F.B. Semi-mechanistic PK/PD modelling of fosfomycin and sulbactam combination against carbapenem-resistant *Acinetobacter baumannii*. *Antimicrob. Agents Chemother.* **2021**, doi:10.1128/aac.02472-20.
10. Mohd Sazlly Lim, S.; Heffernan, A.J.; Roberts, J.A.; Sime, F.B. Pharmacodynamic Analysis of Meropenem and Fosfomycin Combination Against Carbapenem-Resistant *Acinetobacter baumannii* in Patients with Normal Renal Clearance: Can It Be a Treatment Option? *Microb Drug Resist* **2021**, *27*, 546-552, doi:10.1089/mdr.2020.0197.
11. Rodriguez, C.H.; Brune, A.; Nastro, M.; Vay, C.; Famiglietti, A. In vitro synergistic activity of the sulbactam/avibactam combination against extensively drug-resistant

- Acinetobacter baumannii. *J. Med. Microbiol.* **2020**, *69*, 928-931, doi:<https://doi.org/10.1099/jmm.0.001211>.
12. Gaudereto, J.J.; Perdigão Neto, L.V.; Leite, G.C.; Ruedas Martins, R.; Boas do Prado, G.V.; Rossi, F.; Guimarães, T.; Levin, A.S.; Costa, S.F. Synergistic Effect of Ceftazidime-Avibactam with Meropenem against Panresistant, Carbapenemase-Harboring *Acinetobacter baumannii* and *Serratia marcescens* Investigated Using Time-Kill and Disk Approximation Assays. *Antimicrob. Agents Chemother.* **2019**, *63*, doi:10.1128/aac.02367-18.
  13. Ghaith, D.; Hassan, R.; Dawoud, M.E.E.; Eweis, M.; Metwally, R.; Zafer, M. Effect of rifampicin-colistin combination against XDR *Acinetobacter baumannii* harbouring bla(OXA 23)-like gene and showed reduced susceptibility to colistin at Cairo University Hospital, Cairo, Egypt. *Infect Dis (Lond)* **2019**, *51*, 308-311, doi:10.1080/23744235.2018.1558369.
  14. Mataracı Kara, E.; Yilmaz, M.; Özbek Çelik, B. In vitro activities of ceftazidime/avibactam alone or in combination with antibiotics against multidrug-resistant *Acinetobacter baumannii* isolates. *J Glob Antimicrob Resist* **2019**, *17*, 137-141, doi:10.1016/j.jgar.2018.12.004.
  15. Menegucci, T.C.; Fedrigo, N.H.; Lodi, F.G.; Albiero, J.; Nishiyama, S.A.B.; Mazucheli, J.; Carrara-Marroni, F.E.; Voelkner, N.M.F.; Gong, H.; Sy, S.K.B.; et al. Pharmacodynamic Effects of Sulbactam/Meropenem/Polymyxin-B Combination Against Extremely Drug Resistant *Acinetobacter baumannii* Using Checkerboard Information. *Microb Drug Resist* **2019**, *25*, 1266-1274, doi:10.1089/mdr.2018.0283.
  16. Menegucci, T.C.; Albiero, J.; Migliorini, L.B.; Alves, J.L.; Viana, G.F.; Mazucheli, J.; Carrara-Marroni, F.E.; Cardoso, C.L.; Tognim, M.C. Strategies for the treatment of polymyxin B-resistant *Acinetobacter baumannii* infections. *Int. J. Antimicrob. Agents* **2016**, *47*, 380-385, doi:10.1016/j.ijantimicag.2016.02.007.
  17. Oliva, A.; Garzoli, S.; De Angelis, M.; Marzuillo, C.; Vullo, V.; Mastroianni, C.M.; Ragno, R. In-Vitro Evaluation of Different Antimicrobial Combinations with and without Colistin Against Carbapenem-Resistant *Acinetobacter Baumannii*. *Molecules* **2019**, *24*, doi:10.3390/molecules24050886.
  18. Ozger, H.S.; Cuhadar, T.; Yildiz, S.S.; Demirbas Gulmez, Z.; Dizbay, M.; Guzel Tunccan, O.; Kalkanci, A.; Simsek, H.; Unaldi, O. In vitro activity of eravacycline in combination with colistin against carbapenem-resistant *A. baumannii* isolates. *J. Antibiot. (Tokyo)* **2019**, *72*, 600-604, doi:10.1038/s41429-019-0188-6.
  19. Phee, L.M.; Betts, J.W.; Bharathan, B.; Wareham, D.W. Colistin and Fusidic Acid, a Novel Potent Synergistic Combination for Treatment of Multidrug-Resistant *Acinetobacter baumannii* Infections. *Antimicrob. Agents Chemother.* **2015**, *59*, 4544-4550, doi:10.1128/aac.00753-15.
  20. Phee, L.M.; Klopogge, F.; Morris, R.; Barrett, J.; Wareham, D.W.; Standing, J.F. Pharmacokinetic-pharmacodynamic modelling to investigate in vitro synergy between colistin and fusidic acid against MDR *Acinetobacter baumannii*. *J. Antimicrob. Chemother.* **2019**, *74*, 961-969, doi:10.1093/jac/dky524.
  21. Poulakou, G.; Renieris, G.; Sabrakos, L.; Zarkotou, O.; Themeli-Digalaki, K.; Perivolioti, E.; Kraniotaki, E.; Giamarellos-Bourboulis, E.J.; Zavras, N. Daptomycin as adjunctive treatment for experimental infection by *Acinetobacter baumannii* with resistance to colistin. *Int. J. Antimicrob. Agents* **2018**, doi:10.1016/j.ijantimicag.2018.10.024.

22. Shinohara, D.R.; Menegucci, T.C.; Fedrigo, N.H.; Migliorini, L.B.; Carrara-Marroni, F.E.; Maria Dos Anjos, M.; Cardoso, C.L.; Nishiyama, S.A.B.; Tognim, M.C.B. Synergistic activity of polymyxin B combined with vancomycin against carbapenem-resistant and polymyxin-resistant *Acinetobacter baumannii*: first in vitro study. *J. Med. Microbiol.* **2019**, *68*, 309-315, doi:10.1099/jmm.0.000920.
23. Wang, J.; Ning, Y.; Li, S.; Wang, Y.; Liang, J.; Jin, C.; Yan, H.; Huang, Y. Multidrug-resistant *Acinetobacter baumannii* strains with NDM-1: Molecular characterization and in vitro efficacy of meropenem-based combinations. *Exp. Ther. Med.* **2019**, *18*, 2924-2932, doi:10.3892/etm.2019.7927.
24. Chen, F.; Wang, L.; Wang, M.; Xie, Y.; Xia, X.; Li, X.; Liu, Y.; Cao, W.; Zhang, T.; Li, P.; et al. Genetic characterization and in vitro activity of antimicrobial combinations of multidrug-resistant *Acinetobacter baumannii* from a general hospital in China. *Oncol. Lett.* **2018**, *15*, 2305-2315, doi:10.3892/ol.2017.7600.
25. Singkham-In, U.; Chatsuwat, T. In vitro activities of carbapenems in combination with amikacin, colistin, or fosfomycin against carbapenem-resistant *Acinetobacter baumannii* clinical isolates. *Diagn. Microbiol. Infect. Dis.* **2018**, *91*, 169-174, doi:10.1016/j.diagmicrobio.2018.01.008.
26. Zhu, W.; Wang, Y.; Cao, W.; Cao, S.; Zhang, J. In vitro evaluation of antimicrobial combinations against imipenem-resistant *Acinetobacter baumannii* of different MICs. *J. Infect Public Health* **2018**, *11*, 856-860, doi:10.1016/j.jiph.2018.07.006.
27. Lenhard, J.R.; Thamlikitkul, V.; Silveira, F.P.; Garonzik, S.M.; Tao, X.; Forrest, A.; Soo Shin, B.; Kaye, K.S.; Bulitta, J.B.; Nation, R.L.; et al. Polymyxin-resistant, carbapenem-resistant *Acinetobacter baumannii* is eradicated by a triple combination of agents that lack individual activity. *J. Antimicrob. Chemother.* **2017**, *72*, 1415-1420, doi:10.1093/jac/dkx002.
28. Lenhard, J.R.; Smith, N.M.; Bulman, Z.P.; Tao, X.; Thamlikitkul, V.; Shin, B.S.; Nation, R.L.; Li, J.; Bulitta, J.B.; Tsuji, B.T. High-Dose Ampicillin-Sulbactam Combinations Combat Polymyxin-Resistant *Acinetobacter baumannii* in a Hollow-Fiber Infection Model. *Antimicrob. Agents Chemother.* **2017**, *61*, e01268-01216, doi:10.1128/aac.01268-16.
29. Madadi-Goli, N.; Moniri, R.; Bagheri-Josheghani, S.; Dasteh-Goli, N. Sensitivity of levofloxacin in combination with ampicillin-sulbactam and tigecycline against multidrug-resistant *Acinetobacter baumannii*. *Iran J Microbiol* **2017**, *9*, 19-25.
30. Wei, W.; Yang, H.; Hu, L.; Ye, Y.; Li, J. Activity of levofloxacin in combination with colistin against *Acinetobacter baumannii*: In vitro and in a *Galleria mellonella* model. *J. Microbiol. Immunol. Infect.* **2017**, *50*, 821-830, doi:10.1016/j.jmii.2015.10.010.
31. Wei, W.J.; Yang, H.F. Synergy against extensively drug-resistant *Acinetobacter baumannii* in vitro by two old antibiotics: colistin and chloramphenicol. *Int. J. Antimicrob. Agents* **2017**, *49*, 321-326, doi:10.1016/j.ijantimicag.2016.11.031.
32. Bae, S.; Kim, M.-C.; Park, S.-J.; Kim, H.S.; Sung, H.; Kim, M.-N.; Kim, S.-H.; Lee, S.-O.; Choi, S.-H.; Woo, J.H.; et al. In Vitro Synergistic Activity of Antimicrobial Agents in Combination against Clinical Isolates of Colistin-Resistant *Acinetobacter baumannii*. *Antimicrob. Agents Chemother.* **2016**, *60*, 6774-6779, doi:10.1128/AAC.00839-16.
33. Bowler, S.L.; Spychala, C.N.; McElheny, C.L.; Mettus, R.T.; Doi, Y. In Vitro Activity of Fusidic Acid-Containing Combinations against Carbapenem-Resistant *Acinetobacter*

- baumannii Clinical Strains. *Antimicrob. Agents Chemother.* **2016**, *60*, 5101, doi:10.1128/aac.01124-16.
34. Hong, D.J.; Kim, J.O.; Lee, H.; Yoon, E.J.; Jeong, S.H.; Yong, D.; Lee, K. In vitro antimicrobial synergy of colistin with rifampicin and carbapenems against colistin-resistant *Acinetobacter baumannii* clinical isolates. *Diagn. Microbiol. Infect. Dis.* **2016**, *86*, 184-189, doi:10.1016/j.diagmicrobio.2016.07.017.
  35. Laishram, S.; Anandan, S.; Devi, B.Y.; Elakkiya, M.; Priyanka, B.; Bhuvaneshwari, T.; Peter, J.V.; Subramani, K.; Balaji, V. Determination of synergy between sulbactam, meropenem and colistin in carbapenem-resistant *Klebsiella pneumoniae* and *Acinetobacter baumannii* isolates and correlation with the molecular mechanism of resistance. *J. Chemother.* **2016**, *28*, 297-303, doi:10.1080/1120009x.2016.1143261.
  36. Leite, G.C.; Oliveira, M.S.; Perdigao-Neto, L.V.; Rocha, C.K.; Guimaraes, T.; Rizek, C.; Levin, A.S.; Costa, S.F. Antimicrobial Combinations against Pan-Resistant *Acinetobacter baumannii* Isolates with Different Resistance Mechanisms. *PLoS One* **2016**, *11*, e0151270, doi:10.1371/journal.pone.0151270.
  37. Park, G.C.; Choi, J.A.; Jang, S.J.; Jeong, S.H.; Kim, C.M.; Choi, I.S.; Kang, S.H.; Park, G.; Moon, D.S. In Vitro Interactions of Antibiotic Combinations of Colistin, Tigecycline, and Doripenem Against Extensively Drug-Resistant and Multidrug-Resistant *Acinetobacter baumannii*. *Ann. Lab. Med.* **2016**, *36*, 124-130, doi:10.3343/alm.2016.36.2.124.
  38. Yang, H.; Lv, N.; Hu, L.; Liu, Y.; Cheng, J.; Ye, Y.; Li, J. In vivo activity of vancomycin combined with colistin against multidrug-resistant strains of *Acinetobacter baumannii* in a *Galleria mellonella* model. *Infect Dis (Lond)* **2016**, *48*, 189-194, doi:10.3109/23744235.2015.1103894.
  39. Yang, Y.S.; Lee, Y.; Tseng, K.C.; Huang, W.C.; Chuang, M.F.; Kuo, S.C.; Lauderdale, T.L.; Chen, T.L. In Vivo and In Vitro Efficacy of Minocycline-Based Combination Therapy for Minocycline-Resistant *Acinetobacter baumannii*. *Antimicrob. Agents Chemother.* **2016**, *60*, 4047-4054, doi:10.1128/aac.02994-15.
  40. Yavaş, S.; Yetkin, M.A.; Kayaaslan, B.; Baştuğ, A.; Aslaner, H.; But, A.; Kanyilmaz, D.; Sari, B.; Akinci, E.; Bodur, H. Investigating the in vitro synergistic activities of several antibiotic combinations against carbapenem-resistant *Acinetobacter baumannii* isolates. *Turk J Med Sci* **2016**, *46*, 892-896, doi:10.3906/sag-1408-14.
  41. Córdoba, J.; Coronado-Álvarez, N.M.; Parra, D.; Parra-Ruiz, J. In Vitro Activities of Novel Antimicrobial Combinations against Extensively Drug-Resistant *Acinetobacter baumannii*. *Antimicrob. Agents Chemother.* **2015**, *59*, 7316-7319, doi:10.1128/aac.00493-15.
  42. García-Salguero, C.; Rodríguez-Avial, I.; Picazo, J.J.; Culebras, E. Can Plazomicin Alone or in Combination Be a Therapeutic Option against Carbapenem-Resistant *Acinetobacter baumannii*? *Antimicrob. Agents Chemother.* **2015**, *59*, 5959-5966, doi:10.1128/AAC.00873-15.
  43. Marie, M.A.; Krishnappa, L.G.; Alzahrani, A.J.; Mubarak, M.A.; Alyousef, A.A. A prospective evaluation of synergistic effect of sulbactam and tazobactam combination with meropenem or colistin against multidrug resistant *Acinetobacter baumannii*. *Bosn. J. Basic Med. Sci.* **2015**, *15*, 24-29, doi:10.17305/bjbm.2015.526.
  44. Rodríguez, C.H.; Nastro, M.; Vay, C.; Famiglietti, A. In vitro activity of minocycline alone or in combination in multidrug-resistant *Acinetobacter baumannii* isolates. *J. Med. Microbiol.* **2015**, *64*, 1196-1200, doi:10.1099/jmm.0.000147.

45. Vourli, S.; Frantzeskaki, F.; Meletiadis, J.; Stournara, L.; Armaganidis, A.; Zerva, L.; Dimopoulos, G. Synergistic interactions between colistin and meropenem against extensively drug-resistant and pandrug-resistant *Acinetobacter baumannii* isolated from ICU patients. *Int. J. Antimicrob. Agents* **2015**, *45*, 670-671, doi:<https://doi.org/10.1016/j.ijantimicag.2015.02.005>.
46. Galani, I.; Orlandou, K.; Moraitou, H.; Petrikkos, G.; Souli, M. Colistin/daptomycin: an unconventional antimicrobial combination synergistic in vitro against multidrug-resistant *Acinetobacter baumannii*. *Int. J. Antimicrob. Agents* **2014**, *43*, 370-374, doi:10.1016/j.ijantimicag.2013.12.010.
47. Majewski, P.; Wieczorek, P.; Ojdana, D.; Sacha, P.T.; Wieczorek, A.; Tryniszewska, E.A. In vitro activity of rifampicin alone and in combination with imipenem against multidrug-resistant *Acinetobacter baumannii* harboring the blaOXA-72 resistance gene. *Scand. J. Infect. Dis.* **2014**, *46*, 260-264, doi:10.3109/00365548.2013.865141.
48. Nastro, M.; Rodríguez, C.H.; Monge, R.; Zintgraff, J.; Neira, L.; Rebollo, M.; Vay, C.; Famiglietti, A. Activity of the colistin-rifampicin combination against colistin-resistant, carbapenemase-producing Gram-negative bacteria. *J. Chemother.* **2014**, *26*, 211-216, doi:10.1179/1973947813y.0000000136.
49. Oleksiuk, L.M.; Nguyen, M.H.; Press, E.G.; Updike, C.L.; O'Hara, J.A.; Doi, Y.; Clancy, C.J.; Shields, R.K. In vitro responses of *Acinetobacter baumannii* to two- and three-drug combinations following exposure to colistin and doripenem. *Antimicrob. Agents Chemother.* **2014**, *58*, 1195-1199, doi:10.1128/aac.01779-13.
50. Percin, D.; Akyol, S.; Kalin, G. In vitro synergism of combinations of colistin with selected antibiotics against colistin-resistant *Acinetobacter baumannii*. *GMS Hyg Infect Control* **2014**, *9*, Doc14, doi:10.3205/dgkh000234.
51. Sun, Y.; Wang, L.; Li, J.; Zhao, C.; Zhao, J.; Liu, M.; Wang, S.; Lu, C.; Shang, G.; Jia, Y.; et al. Synergistic efficacy of meropenem and rifampicin in a murine model of sepsis caused by multidrug-resistant *Acinetobacter baumannii*. *Eur. J. Pharmacol.* **2014**, *729*, 116-122, doi:10.1016/j.ejphar.2014.02.015.
52. Wang, Y.; Bao, W.; Guo, N.; Chen, H.; Cheng, W.; Jin, K.; Shen, F.; Xu, J.; Zhang, Q.; Wang, C.; et al. Antimicrobial activity of the imipenem/rifampicin combination against clinical isolates of *Acinetobacter baumannii* grown in planktonic and biofilm cultures. *World J. Microbiol. Biotechnol.* **2014**, *30*, 3015-3025, doi:10.1007/s11274-014-1728-7.
53. Cetin, E.S.; Tekeli, A.; Ozseven, A.G.; Us, E.; Aridogan, B.C. Determination of in vitro activities of polymyxin B and rifampin in combination with ampicillin/sulbactam or cefoperazone/sulbactam against multidrug-resistant *Acinetobacter baumannii* by the E-test and checkerboard methods. *Jpn. J. Infect. Dis.* **2013**, *66*, 463-468, doi:10.7883/yoken.66.463.
54. Housman, S.T.; Hagihara, M.; Nicolau, D.P.; Kuti, J.L. In vitro pharmacodynamics of human-simulated exposures of ampicillin/sulbactam, doripenem and tigecycline alone and in combination against multidrug-resistant *Acinetobacter baumannii*. *J. Antimicrob. Chemother.* **2013**, *68*, 2296-2304, doi:10.1093/jac/dkt197.
55. Lee, H.J.; Bergen, P.J.; Bulitta, J.B.; Tsuji, B.; Forrest, A.; Nation, R.L.; Li, J. Synergistic activity of colistin and rifampin combination against multidrug-resistant *Acinetobacter baumannii* in an in vitro pharmacokinetic/pharmacodynamic model. *Antimicrob. Agents Chemother.* **2013**, *57*, 3738-3745, doi:10.1128/aac.00703-13.

56. O'Hara, J.A.; Ambe, L.A.; Casella, L.G.; Townsend, B.M.; Pelletier, M.R.; Ernst, R.K.; Shanks, R.M.Q.; Doi, Y. Activities of vancomycin-containing regimens against colistin-resistant *Acinetobacter baumannii* clinical strains. *Antimicrob. Agents Chemother.* **2013**, *57*, 2103-2108, doi:10.1128/AAC.02501-12.
57. Principe, L.; Capone, A.; Mazzarelli, A.; D'Arezzo, S.; Bordini, E.; Di Caro, A.; Petrosillo, N. In vitro activity of doripenem in combination with various antimicrobials against multidrug-resistant *Acinetobacter baumannii*: possible options for the treatment of complicated infection. *Microb Drug Resist* **2013**, *19*, 407-414, doi:10.1089/mdr.2012.0250.
58. Queenan, A.M.; Davies, T.A.; He, W.; Lynch, A.S. Assessment of the combination of doripenem plus a fluoroquinolone against non-susceptible *Acinetobacter baumannii* isolates from nosocomial pneumonia patients. *J. Chemother.* **2013**, *25*, 141-147, doi:10.1179/1973947813y.0000000074.
59. Deveci, A.; Coban, A.Y.; Acicbe, O.; Tanyel, E.; Yaman, G.; Durupinar, B. In vitro effects of sulbactam combinations with different antibiotic groups against clinical *Acinetobacter baumannii* isolates. *J. Chemother.* **2012**, *24*, 247-252, doi:10.1179/1973947812y.0000000029.
60. Peck, K.R.; Kim, M.J.; Choi, J.Y.; Kim, H.S.; Kang, C.I.; Cho, Y.K.; Park, D.W.; Lee, H.J.; Lee, M.S.; Ko, K.S. In vitro time-kill studies of antimicrobial agents against blood isolates of imipenem-resistant *Acinetobacter baumannii*, including colistin- or tigecycline-resistant isolates. *J. Med. Microbiol.* **2012**, *61*, 353-360, doi:10.1099/jmm.0.036939-0.
61. Vidaillac, C.; Benichou, L.; Duval, R.E. In vitro synergy of colistin combinations against colistin-resistant *Acinetobacter baumannii*, *Pseudomonas aeruginosa*, and *Klebsiella pneumoniae* isolates. *Antimicrob. Agents Chemother.* **2012**, *56*, 4856-4861, doi:10.1128/aac.05996-11.
62. Santimaleeworagun, W.; Wongpoowarak, P.; Chayakul, P.; Pattharachayakul, S.; Tansakul, P.; Garey, K.W. In vitro activity of colistin or sulbactam in combination with fosfomycin or imipenem against clinical isolates of carbapenem-resistant *Acinetobacter baumannii* producing OXA-23 carbapenemases. *Southeast Asian J. Trop. Med. Public Health* **2011**, *42*, 890-900.
63. Pachón-Ibáñez, M.E.; Docobo-Pérez, F.; Jiménez-Mejías, M.E.; Ibáñez-Martínez, J.; García-Curiel, A.; Pichardo, C.; Pachón, J. Efficacy of rifampin, in monotherapy and in combinations, in an experimental murine pneumonia model caused by panresistant *Acinetobacter baumannii* strains. *Eur. J. Clin. Microbiol. Infect. Dis.* **2011**, *30*, 895-901, doi:10.1007/s10096-011-1173-6.
64. Tan, T.Y.; Lim, T.P.; Lee, W.H.; Sasikala, S.; Hsu, L.Y.; Kwa, A.L. In vitro antibiotic synergy in extensively drug-resistant *Acinetobacter baumannii*: the effect of testing by time-kill, checkerboard, and Etest methods. *Antimicrob. Agents Chemother.* **2011**, *55*, 436-438, doi:10.1128/aac.00850-10.
65. Kiratisin, P.; Apisarnthanarak, A.; Kaewdaeng, S. Synergistic activities between carbapenems and other antimicrobial agents against *Acinetobacter baumannii* including multidrug-resistant and extensively drug-resistant isolates. *Int. J. Antimicrob. Agents* **2010**, *36*, 243-246, doi:10.1016/j.ijantimicag.2010.04.011.
66. Pachón-Ibáñez, M.E.; Docobo-Pérez, F.; López-Rojas, R.; Domínguez-Herrera, J.; Jiménez-Mejías, M.E.; García-Curiel, A.; Pichardo, C.; Jiménez, L.; Pachón, J. Efficacy of rifampin and its combinations with imipenem, sulbactam, and colistin in experimental models of

- infection caused by imipenem-resistant *Acinetobacter baumannii*. *Antimicrob. Agents Chemother.* **2010**, *54*, 1165-1172, doi:10.1128/aac.00367-09.
67. Pankuch, G.A.; Seifert, H.; Appelbaum, P.C. Activity of doripenem with and without levofloxacin, amikacin, and colistin against *Pseudomonas aeruginosa* and *Acinetobacter baumannii*. *Diagn. Microbiol. Infect. Dis.* **2010**, *67*, 191-197, doi:10.1016/j.diagmicrobio.2010.01.004.
  68. Rodriguez, C.H.; De Ambrosio, A.; Bajuk, M.; Spinozzi, M.; Nastro, M.; Bombicino, K.; Radice, M.; Gutkind, G.; Vay, C.; Famiglietti, A. In vitro antimicrobials activity against endemic *Acinetobacter baumannii* multiresistant clones. *J Infect Dev Ctries* **2010**, *4*, 164-167, doi:10.3855/jidc.604.
  69. Urban, C.; Mariano, N.; Rahal, J.J. In vitro double and triple bactericidal activities of doripenem, polymyxin B, and rifampin against multidrug-resistant *Acinetobacter baumannii*, *Pseudomonas aeruginosa*, *Klebsiella pneumoniae*, and *Escherichia coli*. *Antimicrob. Agents Chemother.* **2010**, *54*, 2732-2734, doi:10.1128/aac.01768-09.
  70. Yuan, Z.; Ledesma, K.R.; Singh, R.; Hou, J.; Prince, R.A.; Tam, V.H. Quantitative assessment of combination antimicrobial therapy against multidrug-resistant bacteria in a murine pneumonia model. *J. Infect. Dis.* **2010**, *201*, 889-897, doi:10.1086/651024.
  71. Lim, T.P.; Ledesma, K.R.; Chang, K.T.; Hou, J.G.; Kwa, A.L.; Nikolaou, M.; Quinn, J.P.; Prince, R.A.; Tam, V.H. Quantitative assessment of combination antimicrobial therapy against multidrug-resistant *Acinetobacter baumannii*. *Antimicrob. Agents Chemother.* **2008**, *52*, 2898-2904, doi:10.1128/aac.01309-07.
  72. Lim, T.P.; Tan, T.Y.; Lee, W.; Sasikala, S.; Tan, T.T.; Hsu, L.Y.; Kwa, A.L. In vitro activity of various combinations of antimicrobials against carbapenem-resistant *Acinetobacter* species in Singapore. *J. Antibiot. (Tokyo)* **2009**, *62*, 675-679, doi:10.1038/ja.2009.99.
  73. Principe, L.; D'Arezzo, S.; Capone, A.; Petrosillo, N.; Visca, P. In vitro activity of tigecycline in combination with various antimicrobials against multidrug resistant *Acinetobacter baumannii*. *Ann. Clin. Microbiol. Antimicrob.* **2009**, *8*, 18, doi:10.1186/1476-0711-8-18.
  74. Song, J.Y.; Cheong, H.J.; Lee, J.; Sung, A.K.; Kim, W.J. Efficacy of monotherapy and combined antibiotic therapy for carbapenem-resistant *Acinetobacter baumannii* pneumonia in an immunosuppressed mouse model. *Int. J. Antimicrob. Agents* **2009**, *33*, 33-39, doi:10.1016/j.ijantimicag.2008.07.008.
  75. Lee, C.H.; Tang, Y.F.; Su, L.H.; Chien, C.C.; Liu, J.W. Antimicrobial effects of varied combinations of meropenem, sulbactam, and colistin on a multidrug-resistant *Acinetobacter baumannii* isolate that caused meningitis and bacteremia. *Microb Drug Resist* **2008**, *14*, 233-237, doi:10.1089/mdr.2008.0840.
  76. Lee, N.Y.; Wang, C.L.; Chuang, Y.C.; Yu, W.L.; Lee, H.C.; Chang, C.M.; Wang, L.R.; Ko, W.C. Combination carbapenem-sulbactam therapy for critically ill patients with multidrug-resistant *Acinetobacter baumannii* bacteremia: four case reports and an in vitro combination synergy study. *Pharmacotherapy* **2007**, *27*, 1506-1511, doi:10.1592/phco.27.11.1506.
  77. Sader, H.S.; Jones, R.N. Comprehensive in vitro evaluation of cefepime combined with aztreonam or ampicillin/sulbactam against multi-drug resistant *Pseudomonas aeruginosa* and *Acinetobacter* spp. *Int. J. Antimicrob. Agents* **2005**, *25*, 380-384, doi:10.1016/j.ijantimicag.2005.01.011.

78. Sader, H.S.; Rhomberg, P.R.; Jones, R.N. In vitro activity of beta-lactam antimicrobial agents in combination with aztreonam tested against metallo-beta-lactamase-producing *Pseudomonas aeruginosa* and *Acinetobacter baumannii*. *J. Chemother.* **2005**, *17*, 622-627, doi:10.1179/joc.2005.17.6.622.
79. Choi, J.Y.; Park, Y.S.; Cho, C.H.; Park, Y.S.; Shin, S.Y.; Song, Y.G.; Yong, D.; Lee, K.; Kim, J.M. Synergic in-vitro activity of imipenem and sulbactam against *Acinetobacter baumannii*. *Clin. Microbiol. Infect.* **2004**, *10*, 1098-1101, doi:10.1111/j.1469-0691.2004.00987.x.
80. Jung, R.; Husain, M.; Choi, M.K.; Fish, D.N. Synergistic activities of moxifloxacin combined with piperacillin-tazobactam or cefepime against *Klebsiella pneumoniae*, *Enterobacter cloacae*, and *Acinetobacter baumannii* clinical isolates. *Antimicrob. Agents Chemother.* **2004**, *48*, 1055-1057, doi:10.1128/aac.48.3.1055-1057.2004.
81. Montero, A.; Ariza, J.; Corbella, X.; Doménech, A.; Cabellos, C.; Ayats, J.; Tubau, F.; Borraz, C.; Gudiol, F. Antibiotic combinations for serious infections caused by carbapenem-resistant *Acinetobacter baumannii* in a mouse pneumonia model. *J. Antimicrob. Chemother.* **2004**, *54*, 1085-1091, doi:10.1093/jac/dkh485.
82. Yoon, J.; Urban, C.; Terzian, C.; Mariano, N.; Rahal, J.J. In vitro double and triple synergistic activities of Polymyxin B, imipenem, and rifampin against multidrug-resistant *Acinetobacter baumannii*. *Antimicrob. Agents Chemother.* **2004**, *48*, 753-757, doi:10.1128/aac.48.3.753-757.2004.
83. Fernández-Cuenca, F.; Martínez-Martínez, L.; Pascual, A.; Perea, E.J. In vitro activity of azithromycin in combination with amikacin, ceftazidime, ciprofloxacin or imipenem against clinical isolates of *Acinetobacter baumannii*. *Chemotherapy* **2003**, *49*, 24-26, doi:10.1159/000069774.
84. Roussel-Delvallez, M.; Wallet, F.; Delpierre, F.; Courcol, R.J. In vitro bactericidal effect of a beta-lactam+aminoglycoside combination against multiresistant *Pseudomonas aeruginosa* and *Acinetobacter baumannii*. *J. Chemother.* **1996**, *8*, 365-368, doi:10.1179/joc.1996.8.5.365.
85. Mohd Sazlly Lim, S.; Heffernan, A.J.; Zowawi, H.M.; Roberts, J.A.; Sime, F.B. Semi-mechanistic PK/PD modelling of meropenem and sulbactam combination against carbapenem-resistant strains of *Acinetobacter baumannii*. *Eur. J. Clin. Microbiol. Infect. Dis.* **2021**, *40*, 1943-1952, doi:10.1007/s10096-021-04252-z.
